# Supplementary material for: Clinical Significance and Molecular Annotation of Cellular Morphometric Subtypes in Lower Grade Gliomas discovered by Machine Learning: a retrospective multicentric study
Source: Research Square preprint supplement (doi:10.21203/rs.3.rs-770415/v2), 2021-08-16
Supplement: Supplementary file 1 [file 06061286a356fe78b59c56c4.xlsx]

## Sheet: Sheet1
Supplementary Table 20. Defferentially expressed genes between Subtype 2 and Subtype 1 patients.
ID	Gene	logFC	logCPM	LR	PValue	FDR
ENSG00000007908.14	SELE	1.6581	-0.291645	34.1359	5.14e-09	2.57e-06
ENSG00000009709.10	PAX7	1.80634	-0.459771	51.9949	5.56e-13	5.43e-10
ENSG00000011083.7	SLC6A7	-1.12773	2.34135	14.9295	0.000111601	0.00525743
ENSG00000014257.14	ACPP	1.21307	-0.917542	48.047	4.16e-12	3.76e-09
ENSG00000016490.14	CLCA1	1.06164	-4.88093	15.3968	8.71e-05	0.00446675
ENSG00000019169.10	MARCO	-1.04293	0.192844	14.306	0.000155373	0.00656101
ENSG00000034971.13	MYOC	-2.20038	-2.06211	33.5702	6.87e-09	3.25e-06
ENSG00000046604.11	DSG2	1.43805	0.235723	26.5972	2.51e-07	6.59e-05
ENSG00000047936.9	ROS1	-1.31388	-2.02083	16.8325	4.08e-05	0.00269604
ENSG00000052850.5	ALX4	1.74791	-0.0161662	94.0264	3.11e-22	9.42e-19
ENSG00000055732.11	MCOLN3	1.3264	-1.93674	43.5045	4.23e-11	3.32e-08
ENSG00000060566.12	CREB3L3	-1.02055	-2.87221	14.0066	0.00018217	0.00726612
ENSG00000070748.16	CHAT	2.03071	-3.04661	33.8774	5.87e-09	2.82e-06
ENSG00000073734.8	ABCB11	1.16484	-3.57967	21.219	4.1e-06	0.000542258
ENSG00000073756.10	PTGS2	1.04683	1.8815	32.939	9.51e-09	4.32e-06
ENSG00000075891.20	PAX2	2.5913	-1.16939	136.153	1.85e-31	1.12e-27
ENSG00000077274.8	CAPN6	1.53299	-3.30023	40.0459	2.48e-10	1.72e-07
ENSG00000079689.12	SCGN	-1.19559	-0.100056	14.9094	0.000112802	0.0052964
ENSG00000088386.14	SLC15A1	1.40771	-4.16715	30.2348	3.83e-08	1.47e-05
ENSG00000091181.18	IL5RA	1.73629	-1.60567	31.5373	1.96e-08	8.28e-06
ENSG00000091482.5	SMPX	-1.16846	-2.65641	17.335	3.13e-05	0.00226077
ENSG00000094796.4	KRT31	-1.82668	-2.46605	37.1198	1.11e-09	6.93e-07
ENSG00000095596.10	CYP26A1	-1.03457	-1.51937	34.7855	3.68e-09	1.97e-06
ENSG00000101076.15	HNF4A	-1.05624	-3.09277	13.5073	0.000237638	0.00848739
ENSG00000101292.7	PROKR2	-1.13174	-2.50926	15.3555	8.91e-05	0.00453456
ENSG00000101825.7	MXRA5	1.01774	2.80451	32.3027	1.32e-08	5.78e-06
ENSG00000102195.8	GPR50	2.40886	-2.77709	81.031	2.22e-19	4.8e-16
ENSG00000104321.9	TRPA1	1.84164	-2.93372	62.9187	2.15e-15	3.1e-12
ENSG00000104415.12	WISP1	1.601	0.672508	59.8813	1.01e-14	1.3e-11
ENSG00000104722.12	NEFM	-1.15988	5.33047	17.4644	2.93e-05	0.00216732
ENSG00000104938.15	CLEC4M	-1.08609	-4.10157	12.1652	0.000486899	0.0134666
ENSG00000105198.9	LGALS13	-3.23882	-4.47543	19.2252	1.16e-05	0.00116336
ENSG00000105398.3	SULT2A1	-1.21535	-4.86789	11.9959	0.00053318	0.0142155
ENSG00000105825.10	TFPI2	1.13253	-1.05841	34.0395	5.4e-09	2.66e-06
ENSG00000105877.16	DNAH11	1.03829	0.160678	24.3137	8.19e-07	0.000166151
ENSG00000105976.13	MET	-1.37644	2.93001	24.2961	8.26e-07	0.000167115
ENSG00000106178.5	CCL24	2.2504	-2.97669	29.1192	6.81e-08	2.41e-05
ENSG00000106927.10	AMBP	-1.41739	-3.41776	26.3626	2.83e-07	7.16e-05
ENSG00000108342.11	CSF3	2.23801	-1.7274	71.8415	2.33e-17	4.7e-14
ENSG00000109132.6	PHOX2B	1.26918	-4.8861	13.3004	0.000265353	0.0091513
ENSG00000109182.10	CWH43	1.53746	-4.28929	20.8362	5e-06	0.000630425
ENSG00000109851.6	DBX1	2.02833	-4.59778	48.0147	4.23e-12	3.76e-09
ENSG00000110245.10	APOC3	-2.9637	-4.12407	19.2124	1.17e-05	0.0011635
ENSG00000111536.4	IL26	-1.39008	-4.72407	16.0355	6.22e-05	0.00354401
ENSG00000111863.11	ADTRP	-1.11398	-1.37172	27.0509	1.98e-07	5.74e-05
ENSG00000112238.11	PRDM13	1.47629	-2.67921	13.9246	0.000190288	0.00744512
ENSG00000112619.7	PRPH2	-1.07231	-0.0151706	26.6035	2.5e-07	6.59e-05
ENSG00000113430.8	IRX4	1.21828	-3.88809	22.8255	1.77e-06	0.000290801
ENSG00000113889.10	KNG1	-1.25722	-3.43606	15.0946	0.000102253	0.00500462
ENSG00000115705.19	TPO	-1.24132	-3.57979	27.7407	1.39e-07	4.26e-05
ENSG00000116690.10	PRG4	-1.50327	-0.672488	42.9509	5.61e-11	4.35e-08
ENSG00000118194.17	TNNT2	-1.09911	0.744902	13.9598	0.000186763	0.00734997
ENSG00000120057.4	SFRP5	-1.09472	-0.297965	17.8841	2.35e-05	0.00188428
ENSG00000120093.10	HOXB3	1.00687	1.02692	12.3034	0.000452134	0.0128277
ENSG00000120337.8	TNFSF18	1.05882	1.10803	28.421	9.76e-08	3.28e-05
ENSG00000121742.14	GJB6	-1.12789	2.83309	14.768	0.000121584	0.00555887
ENSG00000122787.13	AKR1D1	3.15568	-4.10432	174.097	9.43e-40	1.14e-35
ENSG00000122852.13	SFTPA1	1.01489	-4.58341	19.4505	1.03e-05	0.00107021
ENSG00000123427.14	METTL21B	1.13386	2.87387	81.2333	2.01e-19	4.49e-16
ENSG00000124134.7	KCNS1	-1.04892	2.53294	12.1418	0.000493042	0.0135745
ENSG00000124157.6	SEMG2	-5.26287	-3.01816	23.0074	1.61e-06	0.000272668
ENSG00000124233.11	SEMG1	-5.40496	-2.37056	21.41	3.71e-06	0.000502932
ENSG00000124490.12	CRISP2	1.07581	-5.1337	11.6278	0.000649738	0.0161864
ENSG00000124875.8	CXCL6	-2.09187	-1.21009	33.3993	7.51e-09	3.5e-06
ENSG00000125522.3	NPBWR2	-1.43981	-3.76907	13.165	0.000285232	0.00952158
ENSG00000125726.9	CD70	1.72198	-2.69648	47.8644	4.57e-12	4e-09
ENSG00000125816.4	NKX2-4	-1.56515	-3.91197	19.1493	1.21e-05	0.00119473
ENSG00000125999.9	BPIFB1	-1.70042	-3.65877	21.76	3.09e-06	0.000451423
ENSG00000126545.12	CSN1S1	3.15506	-3.93839	84.162	4.56e-20	1.1e-16
ENSG00000127318.9	IL22	-1.81277	-5.10044	11.526	0.000686283	0.0167384
ENSG00000127329.13	PTPRB	1.75334	5.17123	209.968	1.4e-47	2.81e-43
ENSG00000128422.14	KRT17	-1.97204	0.673319	51.0864	8.84e-13	8.35e-10
ENSG00000130182.6	ZSCAN10	-1.27611	-2.16568	27.1125	1.92e-07	5.58e-05
ENSG00000130368.5	MAS1	-1.17027	0.129362	14.4304	0.000145437	0.00627473
ENSG00000130600.14	H19	1.69501	2.51874	24.8426	6.22e-07	0.000133435
ENSG00000131126.17	TEX101	-1.2126	-3.73182	13.8703	0.000195864	0.00758479
ENSG00000131668.12	BARX1	1.68046	-2.41715	37.1705	1.08e-09	6.82e-07
ENSG00000131738.8	KRT33B	-1.45526	-4.33049	19.5352	9.88e-06	0.00103356
ENSG00000131864.9	USP29	1.71143	-4.46166	31.4863	2.01e-08	8.38e-06
ENSG00000132693.11	CRP	-2.67062	-4.5065	13.8638	0.000196547	0.00760634
ENSG00000133048.11	CHI3L1	1.10195	8.042	13.3651	0.000256352	0.00893214
ENSG00000133110.13	POSTN	1.63988	4.38985	22.6067	1.99e-06	0.000319262
ENSG00000133392.15	MYH11	1.08748	3.69066	31.8702	1.65e-08	7.12e-06
ENSG00000133488.13	SEC14L4	-1.38531	-2.56203	26.7474	2.32e-07	6.23e-05
ENSG00000133636.9	NTS	3.86163	0.67068	116.275	4.14e-27	1.67e-23
ENSG00000133640.17	LRRIQ1	1.22465	-0.378137	24.3245	8.14e-07	0.000165779
ENSG00000134389.9	CFHR5	-1.4202	-4.70496	12.7971	0.00034716	0.0107522
ENSG00000134538.2	SLCO1B1	-2.36503	-2.97739	22.2503	2.39e-06	0.000374055
ENSG00000134757.4	DSG3	-1.18797	-3.35653	10.9088	0.000957111	0.0208701
ENSG00000135426.13	TESPA1	-1.06287	3.43697	11.0435	0.000890004	0.0198725
ENSG00000136244.10	IL6	1.28234	0.190009	29.5799	5.37e-08	1.96e-05
ENSG00000136535.13	TBR1	-1.03751	2.87109	17.4727	2.91e-05	0.00216732
ENSG00000136542.7	GALNT5	1.07501	-0.823477	11.8775	0.000568167	0.0148199
ENSG00000137392.8	CLPS	-1.07338	-4.55006	12.0532	0.000517048	0.0139904
ENSG00000138083.4	SIX3	1.40065	-1.80322	32.7184	1.07e-08	4.77e-06
ENSG00000138472.9	GUCA1C	-1.51548	-4.19505	14.8102	0.000118894	0.00550124
ENSG00000139151.13	PLCZ1	1.45432	-4.17009	36.4535	1.56e-09	9.27e-07
ENSG00000139219.16	COL2A1	1.72454	0.858063	52.2251	4.95e-13	4.91e-10
ENSG00000139304.11	PTPRQ	1.08429	-2.75082	25.5128	4.39e-07	0.000103031
ENSG00000139330.5	KERA	1.43668	-4.52887	18.5351	1.67e-05	0.00147082
ENSG00000140285.8	FGF7	-1.2403	-1.7076	26.8513	2.2e-07	6.07e-05
ENSG00000140481.12	CCDC33	1.32804	-1.19155	21.412	3.7e-06	0.000502932
ENSG00000140798.14	ABCC12	-1.33875	-1.07556	25.5003	4.42e-07	0.000103302
ENSG00000142319.17	SLC6A3	2.25295	-3.18114	71.0185	3.54e-17	6.69e-14
ENSG00000142515.13	KLK3	2.35632	-0.647346	21.5774	3.4e-06	0.00048427
ENSG00000142700.10	DMRTA2	1.15071	1.16965	19.5201	9.95e-06	0.00103814
ENSG00000143278.3	F13B	1.59707	-4.36736	26.8593	2.19e-07	6.07e-05
ENSG00000143556.7	S100A7	-1.16606	-3.5618	17.8361	2.41e-05	0.0019127
ENSG00000145536.14	ADAMTS16	1.21956	0.29918	60.1168	8.94e-15	1.18e-11
ENSG00000145863.9	GABRA6	-2.02343	-2.73032	27.6309	1.47e-07	4.49e-05
ENSG00000146013.9	GFRA3	-1.3197	-2.09681	22.0771	2.62e-06	0.000399053
ENSG00000147571.4	CRH	-1.00919	-0.632532	15.5757	7.93e-05	0.00418382
ENSG00000148346.10	LCN2	-1.61063	-2.487	18.4267	1.77e-05	0.0015436
ENSG00000149305.5	HTR3B	-1.09774	-1.58799	11.0326	0.000895218	0.0199447
ENSG00000149742.8	SLC22A9	-1.1845	-3.42878	16.8067	4.14e-05	0.00272701
ENSG00000150175.13	FRMPD2L2	-1.07118	-1.25435	18.9067	1.37e-05	0.00132219
ENSG00000150244.11	TRIM48	-5.15604	-0.220624	25.6583	4.08e-07	9.72e-05
ENSG00000151577.11	DRD3	2.23768	-3.51691	104.276	1.76e-24	6.26e-21
ENSG00000153347.8	FAM81B	1.03756	0.0153052	12.718	0.000362143	0.0110671
ENSG00000153404.12	PLEKHG4B	1.28752	0.254268	41.2233	1.36e-10	1.03e-07
ENSG00000154146.11	NRGN	-1.03052	6.98216	16.5111	4.84e-05	0.00300359
ENSG00000154165.4	GPR15	1.22031	-4.72192	19.0703	1.26e-05	0.00123719
ENSG00000154438.6	ASZ1	-2.59123	-4.67499	12.2623	0.000462192	0.013016
ENSG00000154760.12	SLFN13	1.0498	1.20131	57.5818	3.24e-14	3.85e-11
ENSG00000154997.8	44088	8.46367	1.44527	635.159	3.77e-140	2.28e-135
ENSG00000155495.8	MAGEC1	-2.6474	-4.0338	17.9762	2.24e-05	0.00182351
ENSG00000155761.12	SPAG17	1.54044	-0.266193	34.2503	4.85e-09	2.46e-06
ENSG00000156076.8	WIF1	-1.08029	2.31201	11.6255	0.000650544	0.0161868
ENSG00000157111.11	TMEM171	-1.32906	-1.41656	28.0213	1.2e-07	3.82e-05
ENSG00000157765.10	SLC34A2	1.09598	-0.161009	20.3765	6.36e-06	0.000747338
ENSG00000158816.14	VWA5B1	1.16823	-1.58817	34.3751	4.54e-09	2.33e-06
ENSG00000158874.10	APOA2	-3.83596	-2.17373	48.3006	3.66e-12	3.35e-09
ENSG00000159251.6	ACTC1	1.41172	1.52949	40.2675	2.21e-10	1.58e-07
ENSG00000159495.7	TGM7	-1.26132	-4.60205	12.1323	0.000495557	0.0136004
ENSG00000160111.11	CPAMD8	-2.38821	2.66433	72.4542	1.71e-17	3.57e-14
ENSG00000160349.8	LCN1	-1.04608	-4.22056	13.3011	0.000265256	0.0091513
ENSG00000160472.4	TMEM190	1.661	-3.58145	39.5259	3.24e-10	2.18e-07
ENSG00000161849.3	KRT84	-2.12323	-4.15761	23.8069	1.07e-06	0.000205815
ENSG00000161905.11	ALOX15	2.10894	-2.10839	117.843	1.88e-27	8.11e-24
ENSG00000162069.13	CCDC64B	-1.03301	-2.85404	23.5508	1.22e-06	0.000225047
ENSG00000162598.12	C1orf87	1.21371	-0.921591	26.1786	3.11e-07	7.72e-05
ENSG00000163032.10	VSNL1	-1.01112	6.33392	14.1688	0.000167115	0.00688118
ENSG00000163263.6	C1orf189	3.04596	-1.71543	164.652	1.09e-37	1.1e-33
ENSG00000163286.6	ALPPL2	1.81465	-4.63595	18.0235	2.18e-05	0.00179571
ENSG00000163331.9	DAPL1	-1.0925	1.71745	18.5954	1.62e-05	0.00145704
ENSG00000163646.9	CLRN1	1.42583	-4.95351	15.0969	0.000102128	0.00500462
ENSG00000163687.12	DNASE1L3	1.07212	-1.11699	25.834	3.72e-07	9.08e-05
ENSG00000163739.4	CXCL1	1.03776	0.387953	23.882	1.02e-06	0.00019921
ENSG00000163792.6	TCF23	1.06339	-1.7241	18.6268	1.59e-05	0.001446
ENSG00000163833.7	FBXO40	-1.19588	-1.48437	23.9267	1e-06	0.000195901
ENSG00000163914.4	RHO	-1.11133	-2.85788	24.2727	8.36e-07	0.000168591
ENSG00000164093.14	PITX2	-2.64267	-1.16221	28.6111	8.85e-08	3.04e-05
ENSG00000164363.9	SLC6A18	-1.69507	-3.56852	16.6984	4.38e-05	0.00282872
ENSG00000164509.12	IL31RA	1.04773	-3.54714	13.9644	0.000186304	0.00734886
ENSG00000164600.5	NEUROD6	-1.32662	1.34932	17.0892	3.57e-05	0.00243762
ENSG00000164879.6	CA3	1.44966	1.91627	40.2733	2.21e-10	1.58e-07
ENSG00000165105.9	RASEF	1.43009	-0.092408	53.5607	2.51e-13	2.61e-10
ENSG00000165553.4	NGB	-1.1909	1.1488	17.1409	3.47e-05	0.00239653
ENSG00000165643.9	SOHLH1	-1.19914	0.697103	21.281	3.97e-06	0.00053081
ENSG00000166961.13	MS4A15	-1.35437	-4.40104	18.7408	1.5e-05	0.00139001
ENSG00000167332.7	OR51E2	1.03279	-3.3572	17.4677	2.92e-05	0.00216732
ENSG00000167434.8	CA4	1.7948	3.59093	132.286	1.3e-30	7.12e-27
ENSG00000167656.4	LY6D	-2.25152	-2.98888	26.9484	2.09e-07	5.91e-05
ENSG00000167749.10	KLK4	1.14549	-3.75717	21.8803	2.9e-06	0.000427083
ENSG00000167751.11	KLK2	2.04692	-2.14294	25.0032	5.72e-07	0.000126814
ENSG00000167768.4	KRT1	-1.04084	-3.434	14.6765	0.000127629	0.00573128
ENSG00000167916.4	KRT24	1.99146	-4.946	30.9961	2.59e-08	1.04e-05
ENSG00000168334.8	XIRP1	1.0322	-0.344558	31.0351	2.53e-08	1.03e-05
ENSG00000168779.18	SHOX2	1.21049	1.11574	14.1295	0.000170644	0.00697425
ENSG00000168878.15	SFTPB	1.74154	-3.35104	91.9505	8.89e-22	2.34e-18
ENSG00000168907.12	PLA2G4F	2.1702	-4.53065	70.0699	5.72e-17	9.89e-14
ENSG00000169344.14	UMOD	2.32534	-5.12064	44.1697	3.01e-11	2.46e-08
ENSG00000169435.12	RASSF6	3.39688	-3.20985	147.495	6.12e-34	4.54e-30
ENSG00000170439.6	METTL7B	1.12208	4.03254	27.8943	1.28e-07	3.95e-05
ENSG00000170454.5	KRT75	-2.52425	-2.29844	28.054	1.18e-07	3.78e-05
ENSG00000170788.12	DYDC1	1.21765	-4.97993	13.458	0.000243965	0.00865509
ENSG00000171346.12	KRT15	-1.30153	-2.64094	15.377	8.81e-05	0.00450223
ENSG00000171401.13	KRT13	-2.01031	-1.65355	14.3404	0.000152555	0.00648014
ENSG00000171501.8	OR1N2	-2.69527	-4.28848	12.4294	0.000422617	0.012202
ENSG00000171509.14	RXFP1	-1.11459	1.33256	22.6048	1.99e-06	0.000319262
ENSG00000171517.5	LPAR3	-1.17074	-2.21265	13.2301	0.000275494	0.00934459
ENSG00000171532.4	NEUROD2	-1.01486	2.72389	18.1891	2e-05	0.00169559
ENSG00000171551.10	ECEL1	1.41529	2.02966	30.1996	3.9e-08	1.49e-05
ENSG00000171557.15	FGG	-2.13763	-4.04717	12.9963	0.000312107	0.0100687
ENSG00000171564.10	FGB	-1.95548	-4.05059	17.7626	2.5e-05	0.00197296
ENSG00000172238.4	ATOH1	1.8922	-4.26535	70.7408	4.07e-17	7.25e-14
ENSG00000172482.4	AGXT	1.52023	-4.03493	23.4731	1.27e-06	0.000228718
ENSG00000172782.10	FADS6	-1.01774	-0.434232	13.2909	0.000266702	0.00918693
ENSG00000173110.7	HSPA6	1.31417	2.50273	36.2833	1.71e-09	1e-06
ENSG00000173213.8	RP11-683L23.1	3.13523	-2.65434	149.355	2.4e-34	2.07e-30
ENSG00000173714.7	WFIKKN2	-1.96722	0.661388	39.6674	3.01e-10	2.05e-07
ENSG00000174576.7	NPAS4	1.42931	0.810663	22.2453	2.4e-06	0.000374059
ENSG00000175084.10	DES	1.21991	1.22245	20.8878	4.87e-06	0.000617549
ENSG00000175707.8	KDF1	-1.00352	-3.76156	14.85	0.000116407	0.00541399
ENSG00000176040.12	TMPRSS7	1.51137	-2.17647	35.4787	2.58e-09	1.44e-06
ENSG00000176194.16	CIDEA	-1.16318	-1.54573	19.9362	8.01e-06	0.000890323
ENSG00000176601.10	MAP3K19	1.09671	0.575135	18.7298	1.51e-05	0.00139515
ENSG00000178363.4	CALML3	-1.62998	-3.44043	20.7617	5.2e-06	0.00064636
ENSG00000178773.13	CPNE7	-1.04456	1.51816	25.1806	5.22e-07	0.000118713
ENSG00000178934.4	LGALS7B	-1.68599	-4.6752	19.7879	8.65e-06	0.000943076
ENSG00000179420.11	OR6W1P	-2.32673	-4.64374	11.4113	0.000729983	0.0174648
ENSG00000179914.4	ITLN1	-3.95727	-2.8138	30.7732	2.9e-08	1.14e-05
ENSG00000180347.12	CCDC129	-2.02748	0.454871	21.4594	3.61e-06	0.00049797
ENSG00000181499.2	OR6T1	4.89548	-3.97073	214.575	1.38e-48	4.17e-44
ENSG00000181541.5	MAB21L2	1.38808	-2.29911	21.5469	3.45e-06	0.000486834
ENSG00000182111.8	ZNF716	-2.92563	-4.07377	22.4471	2.16e-06	0.00034204
ENSG00000182333.13	LIPF	-2.65729	-2.90202	13.3	0.000265407	0.0091513
ENSG00000182759.3	MAFA	2.16162	-2.45068	96.3066	9.84e-23	3.13e-19
ENSG00000184058.11	TBX1	1.30534	-1.06755	67.7574	1.85e-16	2.94e-13
ENSG00000185479.5	KRT6B	-2.33155	-2.64715	15.8397	6.89e-05	0.00382222
ENSG00000185640.5	KRT79	-1.81916	-4.38295	13.1445	0.00028836	0.00957317
ENSG00000185652.10	NTF3	1.46885	-3.43313	47.5556	5.35e-12	4.62e-09
ENSG00000185933.6	CALHM1	-1.3362	-1.13441	25.0958	5.46e-07	0.000122667
ENSG00000186081.10	KRT5	-1.14761	0.521822	16.7151	4.34e-05	0.00282198
ENSG00000186471.11	AKAP14	1.15259	-2.08871	30.3355	3.63e-08	1.41e-05
ENSG00000186732.12	MPPED1	-1.12553	3.48403	19.3777	1.07e-05	0.00109402
ENSG00000186832.7	KRT16	-2.1908	-1.67642	23.2443	1.43e-06	0.000246731
ENSG00000186847.5	KRT14	-2.74708	-0.982511	25.5556	4.3e-07	0.000101522
ENSG00000186897.4	C1QL4	1.04239	2.65887	25.4437	4.55e-07	0.000105563
ENSG00000187017.13	ESPN	1.94264	-0.53432	119.333	8.86e-28	4.12e-24
ENSG00000187094.10	CCK	-1.05183	3.9246	16.7021	4.37e-05	0.00282872
ENSG00000187492.7	CDHR4	1.28832	-2.7598	24.1748	8.8e-07	0.000175629
ENSG00000187714.6	SLC18A3	1.37856	-1.41171	17.9795	2.23e-05	0.00182274
ENSG00000187848.11	P2RX2	1.51214	-1.44302	32.6004	1.13e-08	5e-06
ENSG00000187942.10	LDLRAD2	1.06584	-1.68709	36.7841	1.32e-09	8.06e-07
ENSG00000188488.12	SERPINA5	-1.33671	1.70578	15.8673	6.79e-05	0.00378432
ENSG00000188869.11	TMC3	-1.24344	-0.686	14.7109	0.000125319	0.0056824
ENSG00000196415.8	PRTN3	-1.07595	-2.78025	15.6195	7.75e-05	0.00412412
ENSG00000196805.7	SPRR2B	-1.54747	-5.23704	11.2152	0.000811315	0.018781
ENSG00000197085.10	NPSR1-AS1	-1.07257	-2.06268	15.0929	0.00010235	0.00500479
ENSG00000197587.9	DMBX1	2.25198	-3.52899	63.3714	1.71e-15	2.53e-12
ENSG00000198535.5	C2CD4A	1.15059	-1.61182	28.422	9.76e-08	3.28e-05
ENSG00000198744.5	RP5-857K21.11	-1.16529	4.27449	13.1883	0.000281696	0.00945574
ENSG00000198774.4	RASSF9	2.28434	1.31655	93.1297	4.9e-22	1.35e-18
ENSG00000198788.8	MUC2	-1.80087	-3.35395	14.8128	0.000118726	0.00549885
ENSG00000199289.1	RNU6-502P	2.08859	-5.26465	21.7144	3.16e-06	0.000457877
ENSG00000200198.1	RN7SKP211	1.94417	-5.28867	15.2603	9.37e-05	0.00471942
ENSG00000200795.1	RNU4-1	-1.18017	-2.75154	14.1027	0.000173096	0.00703743
ENSG00000202538.1	RNU4-2	-1.13036	-1.07808	18.5354	1.67e-05	0.00147082
ENSG00000203811.1	HIST2H3C	-1.46357	-4.31254	17.2772	3.23e-05	0.00229882
ENSG00000204140.9	CLPSL1	-1.92009	-4.11738	31.4153	2.08e-08	8.63e-06
ENSG00000204538.3	PSORS1C2	1.22524	-3.86228	24.8155	6.31e-07	0.000133476
ENSG00000204612.1	FOXB2	1.19413	-4.7441	18.5618	1.64e-05	0.00146839
ENSG00000204711.7	C9orf135	1.33809	-2.71962	36.5912	1.46e-09	8.73e-07
ENSG00000205899.3	BHLHA9	-1.15107	-3.40756	13.9463	0.000188112	0.00736951
ENSG00000205922.4	ONECUT3	1.9049	-2.78539	99.5231	1.94e-23	6.52e-20
ENSG00000206075.12	SERPINB5	-1.32815	-3.91427	13.4895	0.000239898	0.00853586
ENSG00000206192.7	ANKRD20A9P	-1.35604	-5.05221	10.8321	0.000997544	0.0214578
ENSG00000206623.1	RNU6-979P	-1.68566	-5.04315	11.7372	0.000612624	0.0156224
ENSG00000207611.1	MIR149	-1.54841	-5.00985	23.6117	1.18e-06	0.000219372
ENSG00000211892.3	IGHG4	2.76302	-0.347968	123.48	1.09e-28	5.52e-25
ENSG00000211899.6	IGHM	-1.21269	1.89756	12.4706	0.000413413	0.0120166
ENSG00000212932.3	RPL23AP4	1.3146	-5.10033	24.1775	8.79e-07	0.000175629
ENSG00000213452.4	AKR1B1P2	-1.20423	-4.99802	13.9614	0.000186601	0.00734997
ENSG00000213645.2	SLC25A1P3	-2.59737	-4.60037	17.334	3.14e-05	0.00226077
ENSG00000213892.9	CEACAM16	5.00548	-2.94818	147.297	6.76e-34	4.54e-30
ENSG00000213921.6	LEUTX	3.48871	-5.1164	34.9834	3.33e-09	1.81e-06
ENSG00000214285.2	NPS	-2.80285	-3.61545	18.8089	1.44e-05	0.00135502
ENSG00000216588.7	IGSF23	-1.63743	-3.72457	23.5016	1.25e-06	0.000226714
ENSG00000218772.2	FAM8A6P	-1.14824	-4.80012	10.9507	0.000935695	0.0206112
ENSG00000220113.2	MTCYBP4	-1.39019	-4.91544	11.5345	0.000683147	0.0167139
ENSG00000220575.6	HTR5A-AS1	-1.00031	0.167447	10.9648	0.000928574	0.0204862
ENSG00000223518.5	CSNK1A1P1	1.26346	-3.7033	58.8278	1.72e-14	2.12e-11
ENSG00000223553.4	SMPD4P1	-1.79895	-2.60218	22.9321	1.68e-06	0.000278891
ENSG00000224792.5	IQCF4	-1.56188	-4.55655	17.5151	2.85e-05	0.00213908
ENSG00000225110.1	LL0XNC01-16G2.1	-1.00939	0.461728	13.2343	0.000274874	0.00934079
ENSG00000226025.8	LGALS17A	1.27948	-2.37225	17.1735	3.41e-05	0.00237452
ENSG00000226148.1	SLC25A39P1	1.18217	-4.81145	28.3411	1.02e-07	3.4e-05
ENSG00000226943.3	ALG1L5P	1.11213	-4.87959	23.3059	1.38e-06	0.000242964
ENSG00000227059.5	ANHX	-1.41571	-4.82623	12.2061	0.000476323	0.0132529
ENSG00000227300.11	KRT16P2	-1.41345	-3.84807	14.0002	0.000182793	0.00727898
ENSG00000229604.2	MTATP8P2	-1.03366	-0.58138	17.3848	3.05e-05	0.00222195
ENSG00000229972.6	IQCF3	-1.58781	-4.6439	21.4202	3.69e-06	0.000502932
ENSG00000230873.7	STMND1	1.0584	-3.65536	18.6708	1.55e-05	0.00141941
ENSG00000231475.3	IGHV4-31	-3.67797	-1.26642	18.1954	1.99e-05	0.0016937
ENSG00000231755.1	CHODL-AS1	3.37994	-4.5878	54.3643	1.67e-13	1.83e-10
ENSG00000232843.2	SNX18P2	1.0716	-5.22298	12.5356	0.000399264	0.0117923
ENSG00000233213.1	KCNJ6-AS1	1.21571	-4.66294	16.9483	3.84e-05	0.00257015
ENSG00000233951.3	RCC2P3	1.42349	-5.22117	18.6905	1.54e-05	0.00141497
ENSG00000234354.3	RPS26P47	1.53305	-3.38057	54.0365	1.97e-13	2.09e-10
ENSG00000235254.3	TMEM185AP1	-1.27906	-4.69088	11.135	0.000847136	0.0192726
ENSG00000236502.1	SIX3-AS1	1.23594	-3.19586	19.9778	7.83e-06	0.000873471
ENSG00000236824.1	BCYRN1	-1.07015	4.53268	26.9596	2.08e-07	5.9e-05
ENSG00000236946.2	HNRNPA1P70	-1.80207	-4.55402	17.304	3.19e-05	0.0022796
ENSG00000237547.1	IGHJ2P	-4.09132	-4.54895	10.893	0.000965301	0.0210108
ENSG00000237691.1	IFNWP2	-1.08426	-4.27522	13.2557	0.000271758	0.00928995
ENSG00000240194.5	CYMP	-1.2413	-4.79948	18.2874	1.9e-05	0.00163909
ENSG00000241794.1	SPRR2A	-2.15093	-4.24642	14.3528	0.000151551	0.00645478
ENSG00000242524.1	OR2U2P	1.14811	-5.31038	11.8756	0.000568742	0.0148221
ENSG00000242908.5	AADACL2-AS1	1.16891	-5.17302	14.9636	0.000109605	0.00518358
ENSG00000242990.2	RPL13AP23	-1.34689	-3.66246	24.5082	7.4e-07	0.000152389
ENSG00000243955.4	GSTA1	-1.13214	-4.16916	12.1	0.000504218	0.0137678
ENSG00000248550.3	OTX2-AS1	-2.02362	-4.29251	12.7092	0.000363854	0.0110875
ENSG00000253267.4	DLGAP2-AS1	1.15912	-5.19416	15.5038	8.23e-05	0.0043008
ENSG00000253569.1	VENTXP5	-1.41367	-4.89898	11.6589	0.000638964	0.0160131
ENSG00000253709.1	IGHV1-14	1.36251	-5.32141	13.4383	0.000246534	0.00871047
ENSG00000255737.2	AGAP2-AS1	1.28267	1.40794	46.1579	1.09e-11	9.17e-09
ENSG00000259234.4	ANKRD34C-AS1	-1.05395	-2.45717	11.518	0.000689253	0.0167773
ENSG00000259905.4	PWRN1	-1.31193	-2.34642	20.8252	5.03e-06	0.000632754
ENSG00000263639.4	MSMB	2.1546	-3.96521	15.4125	8.64e-05	0.00444847
ENSG00000265190.5	ANXA8	-1.01702	-4.17765	17.2999	3.19e-05	0.0022796
ENSG00000267313.5	KC6	-1.57858	-4.31362	13.7163	0.000212599	0.0079234
ENSG00000269332.4	GOLGA2P9	-1.11751	-4.72009	13.0604	0.0003016	0.00986823
ENSG00000273693.1	C2orf27AP1	-1.54222	-4.73558	22.1461	2.53e-06	0.000387896
ENSG00000273963.1	ENPP7P14	3.52104	-4.00907	198.506	4.42e-45	6.69e-41
ENSG00000275385.1	CCL18	-1.84366	-0.643018	19.0209	1.29e-05	0.00126144
ENSG00000275722.3	LYZL6	4.83671	-4.81082	54.743	1.37e-13	1.54e-10
ENSG00000275811.1	HTR1DP1	-1.30483	-4.68564	12.2969	0.000453721	0.0128486
ENSG00000276399.1	FLJ36000	-2.41586	-4.76355	15.363	8.87e-05	0.0045204
ENSG00000276715.3	YWHAEP7	1.07265	-4.56129	11.2872	0.000780451	0.0183047
ENSG00000277586.1	NEFL	-1.09578	6.30827	15.3534	8.92e-05	0.00453596
ENSG00000278195.1	SSTR3	-1.02523	0.719422	15.6473	7.63e-05	0.00408749
ENSG00000278530.3	CHMP1B2P	-1.32496	-3.66834	12.5876	0.000388314	0.0115529
ENSG00000278771.1	Metazoa_SRP	-1.27328	-2.39343	26.4388	2.72e-07	6.94e-05
ENSG00000279516.1	FAM230C	1.72128	-4.92155	11.5394	0.000681368	0.0167063
ENSG00000281591.1	DBET	-1.63336	-3.70482	23.7951	1.07e-06	0.000206422
Abbrevations: FC, fold change; CPM, couts per million; LR, likelyhood-ratio; FDR, false discovery rate.
