# Supplementary material for: Clinical Significance and Molecular Annotation of Cellular Morphometric Subtypes in Lower Grade Gliomas discovered by Machine Learning: a retrospective multicentric study
Source: Research Square preprint supplement (doi:10.21203/rs.3.rs-770415/v2), 2021-08-16
Supplement: Supplementary file 4 [file 2b443461e2e88db601104e6c.docx]

**Supplementary Table 16. Cox proportional hazards regression model on the overall survival of patients in TCGA-GBM cohort**

| Variable | Univariate analysis | | | |  | Multivariable analysis | | | |
| --- | --- | --- | --- | --- | --- | --- | --- | --- | --- |
| HR | LCI | UCI | P value |  | HR | LCI | UCI | P value |
| Subtype 2 vs 1 | 1.58 | 1.22 | 2.05 | < 0.001 |  | 1.597 | 0.996 | 2.563 | 0.052 |
| Age | 1.03 | 1.02 | 1.04 | < 0.001 |  | 1.029 | 1.011 | 1.047 | 0.001 |
| G-CIMP-high vs Classic-like | 0.223 | 0.0678 | 0.736 | 0.0138 |  | 0.705 | 0.092 | 5.41 | 0.737 |
| G-CIMP-low vs Classic-like | 0.432 | 0.193 | 0.965 | 0.0407 |  | 0.784 | 0.284 | 2.164 | 0.639 |
| LGm6-GBM vs Classic-like | 0.683 | 0.388 | 1.2 | 0.187 |  | 0.576 | 0.288 | 1.151 | 0.119 |
| Mesenchymal-like vs Classic-like | 1.24 | 0.868 | 1.77 | 0.237 |  | 1.668 | 1.068 | 2.607 | 0.025 |
| Black or African American vs Asian | 3.26 | 0.761 | 14 | 0.111 |  | 0.195 | 0.032 | 1.198 | 0.078 |
| White vs Asian | 4.3 | 1.07 | 17.3 | 0.0401 |  | 0.677 | 0.157 | 2.921 | 0.601 |
| MGMT promoter unmethylated vs methylated | 1.45 | 1.07 | 1.95 | 0.0157 |  | 1.691 | 1.113 | 2.569 | 0.014 |
| Chr.7.gain.Chr.10.loss vs No combined CNA | 0.775 | 0.605 | 0.992 | 0.0427 |  | NA | | | |
| IDH wild type vs mutant | 2.48 | 1.48 | 4.14 | < 0.001 |  | NA | | | |

**Abbreviations:** HR, hazards ratio; LCI, lower limit of 95% confidence interval; UCI, upper limit of 95% confidence interval
