# Supplementary material for: Clinical Significance and Molecular Annotation of Cellular Morphometric Subtypes in Lower Grade Gliomas discovered by Machine Learning: a retrospective multicentric study
Source: Research Square preprint supplement (doi:10.21203/rs.3.rs-770415/v2), 2021-08-16
Supplement: Supplementary file 5 [file 2c705c93b894fc3d32db95cb.xlsx]

## Sheet: TableS9-SU-LGG-CMC-Grade23_new
Supplementary Table 9 Metadata and cellular morphometric representation of patients in SU-LGG cohort. (CMB: cellular morphometric biomaker; Only CMBs with top 30 largest variations were used for patient-level representation)
PatientID	Subtype	Age.of.Diagnosis	Gender	Grade	Histology.type	Laterality	OS.status	OS.time	CMB_168	CMB_89	CMB_166	CMB_131	CMB_116	CMB_2	CMB_140	CMB_197	CMB_17	CMB_43	CMB_202	CMB_210	CMB_83	CMB_23	CMB_162	CMB_145	CMB_139	CMB_115	CMB_208	CMB_152	CMB_147	CMB_72	CMB_6	CMB_196	CMB_177	CMB_144	CMB_223	CMB_245	CMB_30	CMB_181
1012026	2	27	Male	2	Oligodendroglioma	RIGHT	0	96.5667	1.60583	2.38773	1.8834	0.711948	0.650518	0.640029	0.769897	1.19793	0.977799	0.699436	0.697366	3.80494	0.990123	7.48495	0.838477	0.726153	5.29869	1.63453	1.14991	0.827611	1.30804	2.03213	2.21496	0.103758	0.043792	4.04572	7.19521	8.6096	1.64102	0.903293
1012029	1	14	Male	2	Astrocytoma	NA	0	68.0667	1.22756	1.82526	1.43974	0.544238	0.497279	0.48998	0.588572	0.915777	0.75124	0.534674	0.533092	2.90874	0.756885	10.2393	0.640961	0.555097	4.0505	1.24949	0.879029	0.632655	0.999915	1.55922	1.69319	17.5108	0.903264	3.37398	5.49775	7.00685	1.25445	0.690509
1012031	1	33	Female	2	Astrocytoma	RIGHT	0	95.9	1.23113	1.83058	1.44393	0.545822	0.49869	0.491406	0.585418	0.91783	0.753427	0.53623	0.531795	2.91721	0.759088	10.2691	0.642827	0.556713	4.06229	1.25298	0.881588	0.634497	1.00283	1.56498	1.69812	17.5618	0.905893	3.38351	5.54116	7.13146	1.2581	0.692519
1012033	2	44	Male	2	Astrocytoma	NA	0	22.4	2.51028	2.72498	3.01113	1.13827	1.03998	1.02066	1.21724	1.58453	1.52534	1.11827	1.10819	0.120558	1.58302	0.055137	1.34057	1.16083	8.4641	2.60722	1.74937	1.3232	0.331127	1.39524	0.11764	0.005927	0.004981	0.020746	0.025348	2.16231	0.001926	1.4442
1012034	1	66	Male	2	Oligodendroglioma	LEFT	0	88.8	1.32565	1.97112	1.55471	0.58773	0.536979	0.529136	0.63487	0.881983	0.811274	0.577401	0.572586	3.14119	0.81737	11.0576	0.692183	0.599457	4.37225	1.11927	0.949276	0.683213	1.07982	1.68561	1.8285	18.9102	0.975447	2.73153	5.96739	1.20047	1.3547	0.74569
1012036	1	48	Male	2	Oligodendroglioma	RIGHT	0	89.5	1.56788	2.3313	1.83889	0.695123	0.635145	0.625179	0.750371	1.16958	0.937149	0.682907	0.680886	3.71516	0.966725	13.0772	0.818662	0.708993	5.17347	1.5959	1.12273	0.808053	1.27713	1.8399	2.16262	4.42232	0.04604	0.835379	2.34972	8.62061	1.60219	0.881947
1012042	2	1	Male	2	Astrocytoma	LEFT	0	84.1333	1.59595	2.37303	1.8718	0.707566	0.646514	0.635809	0.765112	1.1906	0.961403	0.695131	0.693074	3.78152	0.984029	6.26787	0.833316	0.721683	5.26607	1.62447	1.14283	0.822517	1.29999	1.99372	2.20133	0.119794	0.967761	4.2877	7.06911	9.22556	1.63092	0.897733
1012044	2	38	Male	2	Oligodendroglioma	RIGHT	0	34.0667	1.90973	2.59747	2.24047	0.846928	0.773851	0.759639	0.912507	1.42404	1.14405	0.832044	0.829582	0.43268	1.17784	0.136714	0.997446	0.863826	6.30272	1.94101	1.36792	0.98452	1.55604	2.40118	2.6349	0.019553	0.046708	4.95175	4.80034	8.27623	1.95214	1.07455
1012050	1	39	Female	2	Astrocytoma	RIGHT	0	89.2333	1.25257	1.86246	1.46908	0.555329	0.507413	0.499745	0.60053	0.934439	0.766549	0.54557	0.543955	2.96802	0.772309	10.448	0.654023	0.566409	4.13305	1.27495	0.896943	0.645548	1.02029	1.5914	1.7277	17.8677	0.655014	3.44193	5.62777	5.34746	1.28002	0.704581
1012051	1	60	Female	2	Oligodendroglioma	RIGHT	0	37.4667	1.57522	2.3422	1.84749	0.698373	0.638114	0.625611	0.753326	1.17514	0.959894	0.6861	0.68407	3.73253	0.971244	13.047	0.822489	0.712307	5.19766	1.60336	1.12798	0.811831	1.2831	1.89658	2.17273	3.83422	0.049088	0.692144	4.83315	6.52649	1.60419	0.88607
1012055	1	31	Male	2	Astrocytoma	LEFT	0	84.9333	1.22621	1.82326	1.43816	0.543642	0.496734	0.489443	0.587748	0.914774	0.750417	0.534088	0.532508	2.90555	0.756056	10.2281	0.640259	0.554489	4.04607	1.24812	0.878066	0.631962	0.99882	1.55906	1.69134	17.4917	0.902275	3.36982	5.51544	7.07999	1.25308	0.689753
1012056	1	54	Female	2	Oligodendroglioma	LEFT	0	87.5667	1.622	2.41176	1.90235	0.719114	0.657065	0.644713	0.777646	1.06081	0.991252	0.706476	0.704338	3.84338	1.00009	12.1037	0.846916	0.733462	5.34774	1.64974	1.16148	0.835941	1.32121	2.01201	2.23725	0.359747	0.01744	4.13761	7.2415	3.15539	1.65753	0.912385
1012058	2	19	Male	2	Astrocytoma	LEFT	0	55.0333	2.5836	1.62385	2.55986	1.19365	1.09066	1.06716	1.28356	0.33801	1.61146	1.17268	1.16913	0.044214	1.65996	0.048836	1.40319	1.21747	8.54233	2.70418	1.89308	1.38758	0.48702	1.2517	0.211697	0.006474	0.067765	0.034961	0.038428	0.393474	0.009329	1.51446
1012060	2	42	Male	2	Astrocytoma	RIGHT	0	13.2333	1.72758	1.46525	2.328	0.880013	0.804081	0.787686	0.951642	1.48054	1.19031	0.864547	0.861001	0.238207	1.22385	0.035371	1.03641	0.897571	6.54951	2.01282	1.42136	1.02298	1.61683	2.45707	2.73783	0.183892	0.080681	5.34345	8.86234	2.12294	2.0284	1.11653
1012063	2	53	Male	2	Astrocytoma	NA	1	6.46667	2.40266	3.55419	2.49565	1.06544	0.97344	0.953379	1.14885	1.79265	1.43331	1.04672	1.0427	1.75873	1.48174	0.340919	1.25451	1.0867	7.92957	2.4461	1.72085	1.23853	1.95138	0.732773	2.18635	0.008991	0.017754	0.307011	0.074291	0.222626	2.02325	1.35179
1012073	1	48	Female	2	Oligodendroglioma	RIGHT	0	78.4	1.23079	1.83007	1.44353	0.545673	0.49859	0.491235	0.588429	0.918119	0.740205	0.536083	0.534497	2.91641	0.75888	10.2663	0.642651	0.55656	4.06118	1.25275	0.881346	0.634323	1.00255	1.56499	1.69766	17.557	0.905645	3.08314	5.54037	7.07254	1.25776	0.692329
1012075	2	75	Male	2	Astrocytoma	RIGHT	1	7	2.37484	3.49679	2.75982	1.05313	0.962266	0.943549	1.13649	1.77195	1.426	1.03463	1.02948	1.31127	1.46462	0.121525	1.2403	1.07415	7.83798	2.41784	1.70098	1.22423	1.93344	1.21017	3.26725	0.017726	0.011158	0.462716	0.18649	0.598845	0.369794	1.33618
1012081	1	74	Male	2	Astrocytoma	LEFT	0	0.5	1.23787	1.8406	1.45184	0.548813	0.501386	0.494098	0.592178	0.738736	0.757554	0.539168	0.536775	2.93319	0.763247	10.3254	0.646349	0.559763	4.08419	1.25847	0.886418	0.637973	1.00832	1.57399	1.70742	17.658	0.910856	3.39346	5.57225	6.7289	1.265	0.696313
1012086	1	19	Male	2	Oligodendroglioma	LEFT	0	62.2667	1.22758	1.82529	1.43976	0.544248	0.497288	0.489988	0.586857	0.915793	0.751253	0.534683	0.533101	2.90879	0.756898	10.2395	0.640973	0.555107	4.05058	1.24951	0.879045	0.632666	0.999933	1.56079	1.69322	17.5111	0.90328	3.35782	5.52554	7.11557	1.25447	0.690522
1012087	2	79	Female	2	Astrocytoma	NA	1	10.0333	2.27885	1.24789	3.09211	1.16888	1.06787	1.05143	1.25422	1.67973	1.56714	1.14834	1.14278	0.044789	1.62544	0.047532	1.37662	1.19221	1.61216	2.62265	1.88793	1.35878	2.09814	2.23259	3.22818	0.004967	0.03505	0.177611	0.200779	2.92082	0.009578	1.48304
1012088	2	23	Male	2	Astrocytoma	LEFT	0	75.6667	1.85604	1.56107	2.19739	0.830639	0.758968	0.745688	0.897701	1.39726	1.12501	0.816042	0.813627	0.469254	1.15519	0.05302	0.978262	0.847213	6.18205	1.90115	1.34161	0.965585	1.52611	2.35911	2.58422	0.462636	0.058863	3.12741	6.22705	10.7649	1.9146	1.05388
1012092	2	8	Male	2	Astrocytoma	LEFT	0	20.5	2.60548	3.73893	0.034356	1.15528	1.0556	1.02804	1.22222	1.51081	1.54225	0.486207	1.12765	1.28076	1.60667	0.241497	1.36059	1.17833	8.59817	2.63662	1.86572	1.33739	2.04601	0.148959	1.84435	0.010523	0.00543	0.081738	0.052049	0.045414	0.032942	1.46577
1012093	2	59	Male	2	NA	NA	1	7.63333	2.58986	3.5915	0.047314	1.15318	1.0517	1.03128	1.22503	0.515861	1.53389	0.87601	1.02648	0.480594	1.60376	0.10037	1.3579	1.17619	8.51173	0.796927	1.86257	1.33969	2.11361	0.118556	3.58526	0.004724	0.008933	0.140529	0.248579	0.044133	2.52327	1.46311
1012027	2	11	Female	3	Astrocytoma	LEFT	1	8.63333	2.1347	3.1742	2.4691	0.94644	0.86479	0.84765	1.0225	1.1737	1.2985	0.92982	0.92706	5.0575	1.3162	6.4368	1.1147	0.96535	7.0358	2.1424	1.5287	1.1002	1.7362	1.7834	2.6437	0.12027	0.023244	0.23511	0.11499	0.49182	0.35935	1.2008
1012032	2	77	Female	3	Astrocytoma	RIGHT	1	9.43333	2.33147	0.591458	2.49705	1.27086	1.16078	1.13249	1.36909	0.240519	1.70494	1.24852	1.2251	0.015089	1.76666	0.037342	1.4926	1.29621	2.43021	2.84734	2.05263	1.47732	2.16095	0.955662	2.93265	0.004873	0.095852	0.06761	0.066158	0.343231	0.455035	1.61242
1012040	2	44	Male	3	Astrocytoma	LEFT	1	18.7667	2.21888	3.29927	0.306165	0.983742	0.898795	0.880272	1.05829	1.48244	1.32411	0.964438	0.902955	5.25414	1.36811	5.14424	1.15851	1.00337	7.32022	2.25761	1.5889	1.14356	1.80721	0.549267	3.0595	0.016242	0.063698	0.573704	0.493177	0.099089	2.23857	1.24813
1012046	1	55	Male	3	Astrocytoma	RIGHT	1	12.5	1.38072	2.053	0.415672	0.612143	0.559244	0.546019	0.65477	1.01018	0.844972	0.601062	0.597098	3.27167	0.851322	11.5169	0.720934	0.624357	4.55589	1.40519	0.988706	0.711592	1.12468	0.437309	1.90445	19.5521	0.073109	3.70473	5.67211	0.147988	1.41097	0.776664
1012053	2	83	Female	3	Astrocytoma	NA	0	5.2	1.59232	2.36763	1.86755	0.705957	0.644857	0.633244	0.763418	1.18766	0.948863	0.69355	0.68203	3.77302	0.981791	6.62348	0.831421	0.720042	5.2541	1.62077	1.14023	0.820647	1.29704	2.01172	2.19632	0.086659	1.16803	4.37203	7.15518	9.03155	1.62721	0.895692
1012059	2	10	Female	3	Astrocytoma	RIGHT	1	32.4667	1.23677	1.83896	1.45054	0.548321	0.500974	0.493656	0.592988	0.922612	0.756876	0.538685	0.536729	2.93056	0.762564	10.3162	0.64577	0.559262	4.08089	1.2576	0.885625	0.637402	1.00742	1.57255	1.7059	17.6422	0.910041	3.28891	5.56617	7.04276	1.26386	0.69569
1012065	1	36	Male	3	Astrocytoma	RIGHT	0	83.7333	1.22585	1.82273	1.43774	0.543484	0.49659	0.4893	0.587757	0.914507	0.750198	0.533932	0.532353	2.90471	0.755836	10.2251	0.640073	0.554327	4.04489	1.24776	0.877811	0.631778	0.998529	1.55785	1.69085	17.4866	0.901976	3.36934	5.50916	7.1027	1.25271	0.689552
1012071	2	41	Female	3	Oligodendroglioma	LEFT	0	79.6	1.76335	2.6094	2.06844	0.781896	0.71443	0.703117	0.845073	1.31568	1.05232	0.768155	0.76583	1.42142	1.0874	0.16278	0.920856	0.797496	5.81928	1.79512	1.26288	0.908923	1.43656	2.24129	2.43258	0.159334	0.089668	4.84036	7.87061	10.0103	1.80225	0.99204
1012074	2	40	Male	3	Astrocytoma	RIGHT	1	25.6	1.89008	2.80871	2.21677	0.837968	0.765609	0.752488	0.906174	1.40959	1.10924	0.823241	0.787754	3.82627	1.16538	0.622275	0.986893	0.854687	6.23659	1.91361	1.35345	0.974104	1.53958	2.29727	2.60702	0.209282	1.14933	4.58452	6.87326	2.28204	1.93149	1.06318
1012076	1	40	Female	3	Astrocytoma	LEFT	0	74.7	1.29651	1.92779	1.52061	0.574809	0.525174	0.515566	0.617798	0.967217	0.793362	0.564707	0.558479	3.07213	0.7994	10.8145	0.676965	0.586277	4.27803	1.31808	0.928405	0.668192	1.05608	1.57902	1.7883	18.4944	0.00637	2.92417	2.01278	7.30777	1.32492	0.729296
1012078	1	67	Female	3	Oligodendroglioma	RIGHT	0	73.9	1.51964	2.25956	1.78231	0.673734	0.615601	0.605809	0.728528	1.13368	0.924248	0.661894	0.659935	3.60085	0.936978	12.381	0.793471	0.687177	5.01428	1.54679	1.08818	0.783189	1.23784	1.55156	2.09607	1.87097	0.060367	3.93228	6.45691	7.03023	1.55293	0.854809
1012079	1	37	Female	3	Astrocytoma	LEFT	1	45.9667	1.2461	1.85284	1.46148	0.55246	0.504791	0.495885	0.596259	0.929538	0.762588	0.542751	0.541145	2.95268	0.768319	10.394	0.650644	0.563483	4.11169	1.26822	0.892308	0.642212	1.01502	1.57193	1.71877	17.7743	0.915778	2.0376	5.5965	7.15905	1.2734	0.70094
1012084	2	12	Female	3	Astrocytoma	RIGHT	1	7.06667	2.23047	3.31585	2.5851	0.988881	0.903556	0.88082	1.06513	1.61124	1.33155	0.971503	0.968236	4.67817	1.37526	0.624721	1.16463	1.00861	7.35977	2.26843	1.5972	1.14953	1.81678	1.30202	3.03818	0.132574	0.017715	1.16482	0.108028	1.00829	1.67128	1.25466
1012091	2	75	Male	3	Astrocytoma	RIGHT	1	5.86667	2.12669	3.16219	2.49403	0.94287	0.861328	0.843512	1.00753	0.900324	1.24842	0.9263	0.914464	4.99056	1.31127	2.01307	1.11044	0.961682	7.01546	2.16463	1.52288	1.09605	1.72758	2.24424	2.93339	0.014056	0.025639	0.241504	1.74228	1.69556	2.08962	1.19628
