# Supplementary material for: Clinical Significance and Molecular Annotation of Cellular Morphometric Subtypes in Lower Grade Gliomas discovered by Machine Learning: a retrospective multicentric study
Source: Research Square preprint supplement (doi:10.21203/rs.3.rs-770415/v2), 2021-08-16
Supplement: Supplementary file 13 [file 7398f6ad1fc4b068a224e8e4.docx]

**Supplementary Table 5. Clinical characteristics of patients in ZN-GBM cohort**

| Variable | **Subtype 1 (N=49)** | **Subtype 2 (N=30)** |  | **P value** | **Overall (N=79)** |
| --- | --- | --- | --- | --- | --- |
| **Age (years)** |  |  |  |  |  |
| Mean (SD) | 54.3 (13.1) | 56.2 (14.8) |  | 0.566 | 55.0 (13.7) |
| Median [Min, Max] | 54.0 [5.00, 81.0] | 59.0 [12.0, 80.0] |  |  | 56.0 [5.00, 81.0] |
| **Gender** |  |  |  |  |  |
| Female | 13 (26.5%) | 10 (33.3%) |  | 0.739 | 23 (29.1%) |
| Male | 35 (71.4%) | 20 (66.7%) |  |  | 55 (69.6%) |
| Missing | 1 (2.0%) | 0 (0%) |  |  | 1 (1.3%) |
| **TERT** |  |  |  |  |  |
| M | 19 (38.8%) | 10 (33.3%) |  | 0.943 | 29 (36.7%) |
| W | 19 (38.8%) | 12 (40.0%) |  |  | 31 (39.2%) |
| Missing | 11 (22.4%) | 8 (26.7%) |  |  | 19 (24.1%) |
| **MGMT methylation** |  |  |  |  |  |
| Hypermethylated | 22 (44.9%) | 9 (30.0%) |  | 0.317 | 31 (39.2%) |
| Hypomethylated | 16 (32.7%) | 13 (43.3%) |  |  | 29 (36.7%) |
| Missing | 11 (22.4%) | 8 (26.7%) |  |  | 19 (24.1%) |
