# Supplementary material for: Clinical Significance and Molecular Annotation of Cellular Morphometric Subtypes in Lower Grade Gliomas discovered by Machine Learning: a retrospective multicentric study
Source: Research Square preprint supplement (doi:10.21203/rs.3.rs-770415/v2), 2021-08-16
Supplement: Supplementary file 17 [file c4fc1559f2e119499cdb1cc5.docx]

**Supplementary Table 3. Clinical characteristics of patients in SU-LGG cohort**

|  | **Subtype 1 (N=16)** | **Subtype 2 (N=21)** | **P value** | **Overall (N=37)** |
| --- | --- | --- | --- | --- |
| **Age (years)** |  |  |  |  |
| Mean (SD) | 45.1 (17.1) | 41.0 (26.2) | 0.573 | 42.8 (22.5) |
| Median [Min, Max] | 44.0 [14.0, 74.0] | 41.0 [1.00, 83.0] |  | 41.0 [1.00, 83.0] |
| **Gender [No. (%)]** |  |  |  |  |
| Female | 8 (50.0%) | 7 (33.3%) | 0.493 | 15 (40.5%) |
| Male | 8 (50.0%) | 14 (66.7%) |  | 22 (59.5%) |
| **Grade [No. (%)]** |  |  |  |  |
| 2 | 11 (68.8%) | 12 (57.1%) | 0.705 | 23 (62.2%) |
| 3 | 5 (31.2%) | 9 (42.9%) |  | 14 (37.8%) |
| **Histology type [No. (%)]** | | | | |
| Astrocytoma | 9 (56.2%) | 17 (81.0%) | 0.124 | 26 (70.3%) |
| Oligodendroglioma | 7 (43.8%) | 3 (14.3%) |  | 10 (27.0%) |
| Missing | 0 (0%) | 1 (4.8%) |  | 1 (2.7%) |
| **Laterality [No. (%)]** |  |  |  |  |
| Left | 7 (43.8%) | 7 (33.3%) | 1 | 14 (37.8%) |
| Right | 8 (50.0%) | 9 (42.9%) |  | 17 (45.9%) |
| Missing | 1 (6.2%) | 5 (23.8%) |  | 6 (16.2%) |
