# Supplementary material for: Clinical Significance and Molecular Annotation of Cellular Morphometric Subtypes in Lower Grade Gliomas discovered by Machine Learning: a retrospective multicentric study
Source: Research Square preprint supplement (doi:10.21203/rs.3.rs-770415/v2), 2021-08-16
Supplement: Supplementary file 26 [file 3edff171ed0d2bbfeeeb2c9b.docx]

**Supplementary Table 17. Cox proportional hazards regression model on the overall survival of patients in ZN-GBM cohort**

| Variable | Univariate analysis | | | |  | Multivariable analysis | | | |
| --- | --- | --- | --- | --- | --- | --- | --- | --- | --- |
| HR | LCI | UCI | P value |  | HR | LCI | UCI | P value |
| Subtype 2 vs 1 | 3.356 | 1.838 | 6.128 | <0.001 |  | 3.101 | 1.681 | 5.72 | <0.001 |
| Age | 1.029 | 1.002 | 1.057 | 0.035 |  | 1.021 | 0.994 | 1.048 | 0.129 |

**Abbreviations:** HR, hazards ratio; LCI, lower limit of 95% confidence interval; UCI, upper limit of 95% confidence interval
