# Supplementary material for: Clinical Significance and Molecular Annotation of Cellular Morphometric Subtypes in Lower Grade Gliomas discovered by Machine Learning: a retrospective multicentric study
Source: Research Square preprint supplement (doi:10.21203/rs.3.rs-770415/v2), 2021-08-16
Supplement: Supplementary file 27 [file 4f1bfd7aaaf77c2bd83ce684.docx]

**Supplementary Table 18. Cox proportional hazards regression model on the overall survival of patients in Pooled-LGG cohort**

| Variable | Univariate analysis | | | |  | Multivariate analysis | | | |
| --- | --- | --- | --- | --- | --- | --- | --- | --- | --- |
| HR | LCI | UCI | P value |  | HR | LCI | UCI | P value |
| Subtype 2 vs 1 | 2.39 | 1.7 | 3.38 | <0.001 |  | 2.315 | 1.617 | 3.315 | <0.001 |
| Male vs Female | 1.1 | 0.783 | 1.54 | 0.589 |  | 1.34 | 0.947 | 1.895 | 0.099 |
| Age | 1.05 | 1.04 | 1.07 | <0.001 |  | 1.057 | 1.043 | 1.071 | <0.001 |
| Grade | 3.73 | 2.56 | 5.43 | <0.001 |  | 2.779 | 1.882 | 4.104 | <0.001 |
| Oligoastrocytoma vs Astrocytoma | 0.589 | 0.374 | 0.928 | 0.0224 |  | 0.734 | 0.461 | 1.167 | 0.191 |
| Oligodendroglioma vs Astrocytoma | 0.485 | 0.328 | 0.715 | <0.001 |  | 0.404 | 0.267 | 0.61 | <0.001 |

**Abbreviations:** HR, hazards ratio; LCI, lower limit of 95% confidence interval; UCI, upper limit of 95% confidence interval
