# Supplementary material for: Clinical Significance and Molecular Annotation of Cellular Morphometric Subtypes in Lower Grade Gliomas discovered by Machine Learning: a retrospective multicentric study
Source: Research Square preprint supplement (doi:10.21203/rs.3.rs-770415/v2), 2021-08-16
Supplement: Supplementary file 28 [file 5950684ba8c68da0f0a95dbb.xlsx]

## Sheet: TableS8-ZN-LGG-CMC-Grade23_new
Supplementary Table 8 Metadata and cellular morphometric representation of patients in ZN-LGG cohort. (CMB: cellular morphometric biomaker; Only CMBs with top 30 largest variations were used for patient-level
PatientID	Subtype	Histological.type	Age_of_Diagnosis	Overall_Survival_Month	Overall_Survial_Status	Gender	Grade	CMB_168	CMB_89	CMB_166	CMB_131	CMB_116	CMB_2	CMB_140	CMB_197	CMB_17	CMB_43	CMB_202	CMB_210	CMB_83	CMB_23	CMB_162	CMB_145	CMB_139	CMB_115	CMB_208	CMB_152	CMB_147	CMB_72	CMB_6	CMB_196	CMB_177	CMB_144	CMB_223	CMB_245	CMB_30	CMB_181
ZN-005	2	O	59	31.9667	0	F	2	1.7389	2.5853	2.0395	0.771	0.7043	0.6914	0.8305	1.2949	1.0328	0.7574	0.7468	3.8305	1.0722	1.069	0.908	0.7863	5.7379	1.7627	1.2452	0.8962	1.4165	2.1941	2.3986	0.0286	0.0609	3.8147	7.8201	10.0211	1.777	0.9782
ZN-006	2	A	59	27.8667	1	F	2	1.7665	2.6166	2.0722	0.7833	0.7156	0.7032	0.8465	1.318	1.0534	0.7696	0.7421	3.6722	1.0894	0.235	0.9225	0.799	5.8299	1.7984	1.2652	0.9106	1.4392	2.2218	2.437	0.0317	0.6308	3.2931	7.7194	10.175	1.8055	0.9939
ZN-008	1	A	40	33.8333	0	M	2	1.3079	1.9447	1.534	0.5799	0.5298	0.5187	0.6254	0.9757	0.8004	0.5697	0.5651	3.0991	0.8064	10.9096	0.6829	0.5914	4.3156	1.3313	0.9366	0.6741	1.0654	1.2934	1.804	18.6015	0.7346	3.2771	5.8331	3.4378	1.3366	0.7357
ZN-009	1	O	66	33.6667	0	F	2	1.2602	1.8738	1.478	0.5587	0.5105	0.5007	0.6031	0.6732	0.7712	0.5489	0.5469	2.9861	0.777	10.5117	0.658	0.5699	4.1557	1.282	0.9024	0.6495	1.0265	1.5479	1.7382	17.9652	0.5947	3.4311	5.496	5.8592	1.2878	0.7089
ZN-010	1	A	53	33.3333	0	M	2	1.8416	2.7382	2.1455	0.8165	0.7435	0.7297	0.8605	0.0011	1.127	0.8021	0.0003	4.3636	1.1355	15.3609	0.681	0.2984	0.0837	0.1056	0.1303	0.9489	0.0009	1.184	0.0013	26.2349	1.2004	0.0023	0.0233	0.5215	0.0007	1.0359
ZN-016	1	A	54	31.7667	0	M	2	1.593	2.3686	1.8683	0.7062	0.6453	0.6331	0.7637	1.1884	0.9733	0.6938	0.6915	3.7746	0.9822	13.2276	0.8318	0.7203	5.2562	1.6214	1.1407	0.821	1.2976	1.6405	2.1972	1.1827	0.1063	3.9161	6.6751	3.9705	1.6279	0.8961
ZN-017	1	A	37	29.8667	0	M	2	1.5847	2.3563	0.6729	0.7026	0.642	0.6299	0.7563	1.0525	0.9698	0.6902	0.6881	3.755	0.9771	13.2184	0.8274	0.7166	5.229	1.6113	1.1344	0.8167	1.2471	0.7015	0.7723	22.6054	0.1834	0.0864	0.0303	0.1521	0.1782	0.8914
ZN-018	1	A	41	29.1333	0	M	2	1.2391	1.8425	1.4533	0.5494	0.5019	0.4946	0.5938	0.9244	0.7583	0.5397	0.5371	2.9362	0.764	10.3359	0.647	0.5603	4.0887	1.2613	0.8873	0.6386	1.0093	1.5756	1.7092	17.6759	0.9118	3.4003	5.5779	6.4305	1.2663	0.697
ZN-023	1	A	54	24.7667	0	F	2	1.6014	2.3812	1.8782	0.71	0.6487	0.6371	0.7675	1.1946	0.9776	0.6975	0.6954	3.7944	0.9874	9.1432	0.8362	0.7242	5.2841	1.63	1.1467	0.8253	1.3044	1.9795	2.2089	0.192	0.0795	4.1065	7.1417	7.5957	1.6365	0.9008
ZN-025	2	A	35	22.2	0	F	2	1.7715	0.8353	2.2596	0.8542	0.7804	0.7686	0.9181	1.4373	1.147	0.8391	0.7185	0.1442	1.1878	0.0372	1.006	0.8712	6.3571	1.961	1.3796	0.9929	1.5693	1.6839	2.6574	0.042	0.0797	5.2717	8.3396	6.9621	1.9688	1.0837
ZN-027	2	O	63	21.0667	0	F	2	2.607	2.5607	2.6716	1.1822	1.0802	1.0539	1.2679	0.5217	1.593	1.1614	1.0667	0.1168	1.6441	0.0838	1.3923	1.2058	5.8136	2.3373	1.9094	1.3742	2.1685	1.4926	2.5575	0.0098	0.1083	0.682	0.1213	0.3654	0.2512	1.4999
ZN-028	2	O	30	20.7333	0	M	2	1.7752	2.6392	2.082	0.787	0.719	0.7062	0.8507	1.3243	1.0591	0.7732	0.7491	4.0156	1.0945	1.2336	0.9269	0.8027	5.8574	1.8069	1.2712	0.9149	1.446	2.1922	2.4485	0.1244	0.2754	4.7905	7.9091	5.8288	1.814	0.9985
ZN-030	2	A	6	17.3667	0	M	2	0.8372	0.0972	2.1974	0.8306	0.7589	0.7451	0.8976	1.3956	1.1157	0.816	0.8083	0.6755	1.1431	0.0209	0.9783	0.8472	6.1815	1.8625	1.3416	0.9656	1.5261	2.3696	2.5842	0.0139	0.1007	4.6796	8.3728	10.6399	1.9146	1.0539
ZN-032	2	O	39	17.3667	0	M	2	1.7107	2.5437	2.0064	0.7584	0.693	0.6801	0.818	1.2762	1.0232	0.7451	0.739	4.053	1.0548	7.2497	0.8932	0.7736	5.6448	1.7413	1.225	0.8817	1.3935	2.0605	2.3596	0.0765	0.0721	3.37	5.298	6.9997	1.7482	0.9623
ZN-033	1	O	23	15.1333	0	M	2	1.419	2.1099	1.6642	0.6291	0.5746	0.561	0.6742	1.0584	0.8684	0.618	0.4619	3.3623	0.8749	11.8359	0.7409	0.6416	4.6821	1.4443	1.0161	0.7313	1.1558	1.2077	1.9572	20.2412	1.0225	2.736	0.6653	2.3087	1.45	0.7982
ZN-036	1	O	48	14.3333	0	M	2	1.6354	2.4317	0.1251	0.725	0.6623	0.6498	0.7763	1.185	1.0008	0.7123	0.5919	3.8751	1.0083	13.6411	0.8538	0.7395	5.3962	1.6642	1.1372	0.8428	0.303	0.254	0.0302	23.3284	0.0968	0.0341	0.4457	0.1179	0.0019	0.9199
ZN-037	1	O	35	13.8333	0	F	2	1.5921	2.3674	1.8673	0.7059	0.6449	0.6335	0.7629	1.1878	0.9738	0.6935	0.4767	3.7726	0.9817	13.2744	0.8313	0.72	5.2535	1.6206	1.1401	0.8206	1.2969	1.6289	2.1961	3.5563	0.0374	3.19	1.2785	8.1869	1.627	0.8956
ZN-039	1	A	31	13.6333	0	M	2	1.3215	1.9649	1.5499	0.5859	0.5353	0.5268	0.6335	0.9858	0.8045	0.5756	0.5676	3.1313	0.8148	11.0229	0.69	0.5976	4.3605	1.3451	0.9463	0.6811	1.0764	1.6474	1.8228	18.8508	0.1506	2.6152	5.1594	2.9904	1.3504	0.7433
ZN-040	1	A	39	13.6	0	M	2	1.4665	2.1806	1.72	0.6502	0.594	0.5853	0.7031	1.094	0.8958	0.6388	0.633	3.475	0.9042	12.145	0.7657	0.6632	4.839	1.4927	1.0501	0.7558	1.1946	1.8498	2.0228	3.7276	0.7309	4.0252	6.5611	6.6947	1.4987	0.8249
ZN-043	2	A	47	12.4667	0	F	2	1.6538	2.4591	1.9397	0.7332	0.6699	0.6573	0.7929	1.2338	0.9901	0.7203	0.6262	3.9186	1.0197	6.9757	0.8635	0.7479	5.457	1.6834	1.1843	0.8523	1.3471	1.9289	2.2812	0.1925	0.1465	4.5013	5.0957	9.5558	1.6901	0.9303
ZN-045	2	O	24	11.5	0	M	2	1.8452	2.7436	2.1641	0.8181	0.7473	0.7331	0.884	1.3764	1.0999	0.8037	0.7407	4.372	1.1377	7.3845	0.9635	0.8344	6.0885	1.8782	1.3213	0.951	1.503	1.9949	2.5448	0.085	0.0354	0.8271	1.0895	7.9542	1.8665	1.0379
ZN-047	2	A	49	11.2	0	M	2	1.7009	2.5289	1.9949	0.7541	0.689	0.6769	0.8147	1.2688	1.0239	0.7409	0.7386	4.0304	1.0488	2.5037	0.8881	0.7692	5.6125	1.7313	1.218	0.8766	1.3855	2.1438	2.3461	0.0643	0.0541	4.6475	7.6223	9.7049	1.7382	0.9568
ZN-048	1	O	50	11.1667	0	F	2	1.4027	2.0857	1.6451	0.6219	0.5681	0.5556	0.6704	1.0464	0.8584	0.611	0.5987	3.3237	0.8649	11.7001	0.7324	0.6343	4.6284	1.4277	1.0044	0.7229	1.1426	1.4798	1.9347	20.009	0.0302	1.9643	0.684	2.6121	1.4326	0.789
ZN-050	2	A	31	10.5	0	F	2	1.7431	2.5629	2.0444	0.7728	0.706	0.6934	0.8334	1.3004	1.0248	0.7592	0.7525	3.4112	1.0748	0.1679	0.9102	0.7882	5.7516	1.7742	1.2482	0.8984	1.4199	2.2162	2.4043	0.1065	0.0518	4.791	7.1511	9.9766	1.7813	0.9805
ZN-051	1	O	34	10.5	0	M	2	1.3561	2.0164	1.5905	0.6012	0.5492	0.5388	0.65	1.0117	0.8294	0.5907	0.5449	3.2133	0.8361	11.311	0.7081	0.6132	4.4746	1.38	0.9711	0.6989	1.1046	1.6143	1.8705	13.0563	0.0541	3.1593	3.7049	7.7266	1.3858	0.7628
ZN-052	2	A	50	9.9	0	F	2	2.4334	3.5083	2.8465	1.0795	0.9863	0.9613	1.1502	1.8091	1.432	1.0605	0.6442	0.7671	1.5013	0.1454	1.2714	1.1011	8.0343	2.4783	1.7436	1.2549	1.979	1.1505	3.2051	0.014	0.0133	0.2019	0.0942	0.9715	0.292	1.3696
ZN-053	2	A	35	9.8	0	M	2	1.7265	2.5669	2.0249	0.7654	0.6994	0.6863	0.8277	1.288	1.0318	0.752	0.7495	3.9068	1.0645	1.0121	0.9015	0.7807	5.6968	1.757	1.2363	0.8898	1.4063	1.9804	2.3814	0.2909	0.0376	4.6285	6.7745	9.8821	1.7643	0.9712
ZN-056	2	A	24	8.66667	0	F	2	2.2751	3.3827	2.5003	1.0087	0.9216	0.9006	1.0848	1.2917	1.3564	0.9909	0.9875	5.2217	1.4028	1.6201	1.1879	1.0288	7.5063	2.2963	1.6291	1.1725	1.8455	1.1139	2.7072	0.074	0.0588	0.1817	0.0778	0.5605	0.4947	1.2797
ZN-060	2	A	51	8.23333	0	M	2	2.0437	3.014	2.3971	0.9061	0.8278	0.8129	0.9778	1.5246	1.2158	0.8902	0.8846	1.3645	1.2602	0.3177	1.0672	0.9242	6.744	2.0804	1.4636	1.0534	1.6648	1.9009	2.8191	0.1536	0.0354	3.6403	3.6371	4.2617	2.0885	1.1497
ZN-063	1	O	36	7.03333	0	F	2	1.2263	1.8233	1.4382	0.5437	0.4967	0.4892	0.588	0.9148	0.7484	0.5341	0.5274	2.9057	0.7561	10.2285	0.6403	0.5545	4.0462	1.2482	0.8781	0.632	0.9989	1.5591	1.6914	17.4923	0.9023	3.3686	5.52	7.0856	1.2531	0.6898
ZN-067	2	A	54	6.86667	0	F	2	1.9916	2.9022	2.2786	0.883	0.8068	0.7833	0.9507	1.4841	1.1879	0.8675	0.8617	1.5864	1.228	0.1812	1.0399	0.9006	6.5718	2.0273	1.4262	1.0265	1.6223	2.389	2.7472	0.0485	0.0329	5.044	8.5682	0.3305	2.0353	1.1203
ZN-068	2	A	49	6.76667	0	F	2	2.1231	1.7647	2.6662	1.0079	0.9209	0.9066	1.0876	1.6959	1.3573	0.9902	0.9869	0.0327	1.4016	0.0447	1.187	1.028	7.5011	2.3139	1.6279	1.1716	1.8517	1.7473	3.1353	0.1126	0.0518	0.7269	0.6028	4.2644	2.3209	1.2787
ZN-070	2	A	33	6.16667	0	F	2	1.678	2.4949	1.968	0.7439	0.6797	0.6658	0.8043	1.2518	1.007	0.7309	0.7103	3.976	1.0346	1.5242	0.8761	0.7588	5.5367	1.708	1.2016	0.8648	1.3668	2.1197	2.3145	0.9974	1.1859	4.0968	7.5465	9.7017	1.7147	0.9439
ZN-071	1	O	36	5.86667	0	M	2	1.2263	1.8234	1.4383	0.5437	0.4967	0.4881	0.5878	0.9148	0.7505	0.5341	0.5325	2.9058	0.7561	10.2289	0.6403	0.5545	4.0464	1.2482	0.8781	0.632	0.9989	1.5577	1.6915	17.493	0.8968	3.3705	5.5202	7.1075	1.2532	0.6898
ZN-072	1	A	67	5.83333	0	F	2	1.4239	2.1173	1.6701	0.6313	0.5767	0.5682	0.6826	1.0623	0.8583	0.6202	0.6097	3.3741	0.878	11.8749	0.7435	0.6439	4.6985	1.4494	1.0197	0.7339	1.1599	1.7986	1.9641	4.9137	0.4666	3.9075	6.4006	8.25	1.4551	0.801
ZN-076	1	O	31	3.3	0	F	2	1.2634	1.8785	1.4817	0.5601	0.5117	0.504	0.605	0.9425	0.7732	0.5503	0.5478	2.9936	0.779	10.538	0.6597	0.5713	4.1686	1.2859	0.9047	0.6511	1.0291	1.4694	1.7426	18.019	0.2551	3.4581	5.4301	5.4331	1.291	0.7106
ZN-078	2	A	72	3.1	0	F	2	1.7655	2.6239	2.0707	0.7827	0.7152	0.6995	0.8445	1.317	1.0498	0.769	0.7656	3.7813	1.0886	0.5296	0.9219	0.7984	5.8256	1.7971	1.2643	0.9099	1.4381	2.1744	2.4352	0.0479	0.0577	4.8282	7.0828	8.6781	1.8042	0.9931
ZN-001	2	O	61	14.6	1	M	3	1.6709	2.4843	1.9597	0.7408	0.6768	0.6667	0.8011	1.2465	0.9952	0.7278	0.7254	3.9148	1.0302	1.0735	0.8724	0.7556	5.5133	1.7007	1.1965	0.8611	1.361	2.1112	2.3047	0.5662	1.1605	4.5899	7.514	9.6826	1.7075	0.9399
ZN-003	1	O	56	8.8	1	M	3	1.2328	1.833	1.4459	0.5466	0.4994	0.4918	0.5911	0.9197	0.7544	0.537	0.5347	2.9211	0.7601	10.283	0.6437	0.5575	4.0678	1.2548	0.8828	0.6353	1.0042	1.5602	1.7004	17.4843	0.4886	3.3849	5.5277	7.1291	1.2598	0.6935
ZN-007	2	OA	47	17	1	M	3	0.0838	0.4087	2.8789	1.09	0.996	0.979	1.1756	1.8341	1.4772	1.0709	1.0487	0.0026	1.4736	0.0239	1.2837	1.1118	8.1125	2.5025	1.7605	1.2671	2.0009	1.8237	3.3911	0.2124	0.052	0.4789	0.8367	1.2845	2.5116	1.3829
ZN-011	1	O	47	29.2333	0	F	3	1.2567	1.8686	1.4739	0.5572	0.5091	0.5002	0.6025	0.9375	0.7684	0.5474	0.5422	2.9778	0.7749	10.4825	0.6562	0.5683	4.1467	1.2792	0.8999	0.6477	1.0237	1.5863	1.7334	16.7454	0.1081	3.4512	5.5959	6.8791	1.2842	0.7069
ZN-012	1	O	52	33.3333	0	M	3	1.4317	2.1289	1.6792	0.6348	0.58	0.5697	0.686	1.0681	0.8762	0.6236	0.6179	3.3926	0.8828	11.9425	0.7476	0.6474	4.7243	1.4573	1.0252	0.7379	1.1662	1.2424	1.9748	20.3875	0.069	2.1363	0.9997	1.6039	1.4631	0.8054
ZN-013	1	A	55	16.8667	1	M	3	1.3513	2.0093	1.5847	0.5991	0.5474	0.5356	0.643	1.0081	0.827	0.5886	0.5615	3.202	0.8332	11.2717	0.7056	0.6111	4.4589	1.3755	0.9677	0.6964	1.1007	1.1807	1.8639	19.2664	0.1326	3.5301	5.1904	0.9886	1.3809	0.7601
ZN-015	2	A	41	32.2667	0	F	3	2.2957	3.1777	2.3469	1.0254	0.9366	0.9122	1.1005	1.7251	1.3717	1.0073	0.8631	0.2981	1.426	0.1399	1.2076	1.0458	7.6312	2.3529	1.6561	1.1919	1.8839	0.9962	3.19	0.0552	0.0486	2.4844	1.3522	0.2997	2.3634	1.3009
ZN-019	1	O	35	29.2333	0	M	3	1.2458	1.8523	1.4611	0.5523	0.5046	0.496	0.597	0.9294	0.7624	0.5426	0.5352	2.9519	0.7681	10.3913	0.6505	0.5633	4.1106	1.268	0.8921	0.642	1.0148	1.5451	1.7183	17.7707	0.23	3.3824	5.5505	6.6364	1.2731	0.7008
ZN-020	2	A	12	6.76667	1	F	3	0.5268	0.4628	2.5452	0.9626	0.8794	0.8606	1.0367	1.6198	1.2881	0.9457	0.9378	0.0399	1.3372	0.0282	1.1337	0.9818	7.1644	2.2101	1.5548	1.119	1.7686	2.66	2.9949	0.0734	0.0563	2.7624	9.7497	1.3776	2.2188	1.2214
ZN-022	2	A	59	46.6	0	F	3	1.66	2.4683	1.9469	0.736	0.6725	0.6611	0.7954	1.2384	1.0012	0.723	0.718	3.9079	1.0235	2.0835	0.8668	0.7506	5.4774	1.6897	1.1887	0.8555	1.3522	2.0988	2.2897	0.3564	1.1835	4.552	7.4452	9.6186	1.6964	0.9338
ZN-024	1	O	36	24.0333	0	M	3	1.4421	2.1443	1.691	0.6394	0.5811	0.5743	0.6818	0.0175	0.8826	0.6281	0.0691	3.4172	0.8892	12.0293	0.753	0.6521	0.1755	1.4579	1.0327	0.7433	1.1747	1.8088	1.9892	20.5639	1.0611	3.9423	6.4838	0.9421	1.4737	0.8112
ZN-026	2	A	72	10.3667	1	M	3	1.9086	2.798	2.2392	0.8464	0.7734	0.7588	0.9137	1.4243	1.138	0.8316	0.8232	0.8098	1.1772	0.2233	0.9969	0.8633	6.2996	1.9433	1.3671	0.9839	1.5551	1.8514	2.6334	0.4183	0.0273	4.651	8.3234	4.4957	1.951	1.0739
ZN-029	1	O	46	18.1667	0	F	3	1.2648	1.8806	1.4834	0.5607	0.5123	0.5033	0.6059	0.9434	0.774	0.5509	0.546	2.9969	0.7798	10.5498	0.6604	0.5719	4.1733	1.2874	0.9057	0.6518	1.0302	1.598	1.7445	18.0287	0.9297	3.4516	5.67	4.4523	1.2925	0.7114
ZN-031	2	A	55	8.23333	1	M	3	1.7007	2.5288	1.9946	0.754	0.6889	0.6786	0.8154	1.2686	1.0078	0.7407	0.7352	4.0252	1.0486	3.5915	0.888	0.769	5.6116	1.7311	1.2178	0.8765	1.3853	2.0967	2.3458	0.2782	0.2897	4.6464	7.5783	7.2212	1.7379	0.9566
ZN-035	2	A	48	7.56667	1	F	3	2.0333	3.0228	2.3847	0.9015	0.8236	0.8022	0.969	0.534	1.2337	0.8856	0.8804	4.3985	1.2537	1.1879	1.0617	0.9194	6.7091	2.0321	1.456	1.0479	1.6562	2.3829	2.8045	0.0262	0.0534	1.0603	4.0634	6.3232	2.0778	1.1437
ZN-038	1	O	49	13.7667	0	M	3	1.3189	1.9612	1.5469	0.5848	0.5343	0.5258	0.632	0.984	0.8072	0.5745	0.5711	3.1253	0.8132	11.0017	0.6887	0.5964	4.3521	1.3425	0.9445	0.6798	1.0744	1.5994	1.8193	18.6816	0.4146	3.6241	5.8731	1.5808	1.3478	0.7419
ZN-041	1	A	44	9.46667	1	F	3	1.2777	1.8998	1.4985	0.5665	0.5175	0.5081	0.6101	0.9532	0.7819	0.5565	0.5513	3.0275	0.7878	10.6573	0.6671	0.5778	4.2159	1.3005	0.9149	0.6585	1.0407	1.4506	1.7623	18.2257	0.6101	3.4665	5.6152	3.8895	1.3057	0.7187
ZN-042	1	A	64	13.3333	0	M	3	1.3069	1.9433	1.5328	0.5794	0.5294	0.5179	0.6266	0.975	0.7994	0.5692	0.5604	3.0968	0.8058	10.9014	0.6824	0.591	4.3124	1.3303	0.9359	0.6736	1.0646	1.5563	1.8027	16.5632	0.9519	3.4725	5.7885	3.4252	1.3356	0.7352
ZN-044	1	A	35	11.6	0	M	3	1.7983	2.6739	2.1091	0.7973	0.7285	0.7171	0.8621	1.3415	1.0852	0.7833	0.7773	4.2611	1.1088	8.7112	0.939	0.8132	5.9337	1.8304	1.2877	0.9268	1.4648	2.0426	2.4804	0.3049	0.0783	0.8568	0.8506	8.8281	1.836	1.0115
ZN-046	2	A	40	11.2	0	F	3	2.0664	3.0726	2.2547	0.9162	0.8369	0.8202	0.9885	1.541	1.2506	0.9	0.893	4.8961	1.2741	7.75	1.079	0.9344	6.8185	2.1033	1.4797	1.065	1.6826	0.8191	2.8503	0.0836	0.1077	0.4154	1.7387	0.4316	2.1117	1.1624
ZN-049	1	A	28	10.8333	0	F	3	1.3292	1.9763	1.5589	0.5893	0.5384	0.5302	0.6373	0.9916	0.8113	0.5789	0.5765	3.1495	0.8195	11.0857	0.694	0.601	4.3858	1.3529	0.9518	0.685	1.0827	1.6893	1.8333	11.2971	0.348	3.6441	5.9824	7.6908	1.3583	0.7477
ZN-054	2	A	60	4.1	1	M	3	1.8591	2.7644	2.1805	0.8243	0.7531	0.7319	0.8817	0.4754	1.0969	0.8098	0.356	4.4026	1.1463	4.0172	0.9707	0.8407	5.896	1.8453	1.3313	0.9582	1.5141	2.3011	2.5644	0.0397	0.0125	0.6442	7.2498	7.0113	1.8999	1.0458
ZN-057	2	A	58	1.43333	1	M	3	1.6668	2.4784	1.955	0.739	0.6752	0.6641	0.799	1.2434	0.996	0.726	0.7239	3.9489	1.0277	3.9077	0.8703	0.7537	5.5	1.6966	1.1936	0.8591	1.3577	2.1008	2.2991	0.1748	0.0398	4.2801	7.0326	9.3459	1.7034	0.9376
ZN-058	1	A	61	8.43333	0	F	3	1.7433	2.5921	2.0446	0.7729	0.7061	0.693	0.8338	1.3004	1.0615	0.7593	0.7468	4.1309	1.0749	13.4747	0.9103	0.7883	5.7523	1.7745	1.2484	0.8985	1.42	1.9567	2.4046	0.0958	0.0301	2.5457	2.0057	3.5079	1.7815	0.9806
ZN-059	2	O	54	8.36667	0	M	3	1.8388	2.734	2.1566	0.8152	0.7449	0.7317	0.8796	1.3715	1.1036	0.8009	0.7959	4.3288	1.1338	1.8642	0.9601	0.8315	6.0673	1.8716	1.3167	0.9477	1.4978	1.8165	2.5363	0.1124	0.0475	5.0189	6.6431	4.1551	1.8791	1.0343
ZN-061	2	A	37	8.06667	0	F	3	1.6443	2.4449	1.9285	0.729	0.6661	0.6541	0.7869	1.2267	0.9871	0.7162	0.7076	3.8961	1.0138	4.318	0.8586	0.7436	5.4256	1.6737	1.1775	0.8474	1.3394	2.0877	2.268	0.0461	0.0237	4.4985	7.3753	9.5292	1.6803	0.9249
ZN-062	1	A	66	7.53333	0	F	3	1.2429	1.8481	1.4577	0.551	0.5035	0.4956	0.5957	0.9272	0.746	0.5414	0.5398	2.9451	0.7664	10.3674	0.649	0.562	4.1012	1.2651	0.89	0.6406	1.0124	1.5118	1.7144	17.7168	0.0347	3.3286	5.4333	7.093	1.2701	0.6991
ZN-064	1	A	41	7.03333	0	F	3	1.5932	2.3689	1.8685	0.7063	0.6452	0.6323	0.7634	1.1885	0.967	0.6939	0.5277	3.7751	0.9823	10.0779	0.8319	0.7204	5.2564	1.6209	1.1408	0.8211	1.2977	1.9568	2.1975	0.1016	0.6934	3.7854	4.7706	9.0447	1.628	0.8962
ZN-065	1	O	36	7	0	M	3	1.6485	2.4511	1.9334	0.7308	0.6677	0.6549	0.7887	1.2298	1.0083	0.718	0.709	3.9061	1.0164	13.7131	0.8607	0.7454	5.4394	1.6779	1.1804	0.8496	1.3428	1.7965	2.2738	1.3956	0.0143	3.3729	4.1614	3.216	1.6846	0.9273
ZN-066	1	OA	51	6.96667	0	M	3	1.3932	2.0715	1.634	0.6177	0.5643	0.5557	0.668	1.0393	0.8525	0.6068	0.5316	3.3012	0.859	11.6172	0.7274	0.63	4.597	1.4181	0.9976	0.718	1.1348	1.7652	1.9216	6.4023	1.0175	3.8278	6.266	8.0583	1.4237	0.7837
ZN-073	1	O	49	5.43333	0	F	3	1.4726	2.1897	1.7272	0.6529	0.5966	0.5871	0.7061	1.0986	0.9002	0.6414	0.6375	3.4894	0.908	12.1653	0.7689	0.6659	4.8591	1.4989	1.0545	0.759	1.1995	1.8673	2.0312	1.0218	1.0813	4.0445	6.6277	8.5368	1.5049	0.8284
ZN-074	1	O	56	5.4	0	M	3	1.2542	1.8649	1.471	0.556	0.508	0.4989	0.6011	0.9357	0.7675	0.5463	0.5422	2.9719	0.7733	10.4616	0.6549	0.5671	4.1384	1.2766	0.8981	0.6464	1.0216	1.5853	1.7299	17.5246	0.1192	3.4437	5.6127	6.1858	1.2817	0.7055
ZN-075	1	A	42	3.33333	0	F	3	1.4538	2.1616	1.705	0.6445	0.5888	0.5777	0.6941	1.0845	0.8893	0.6332	0.628	3.4447	0.8964	12.1219	0.7591	0.6574	4.7969	1.4794	1.041	0.7492	1.1842	1.4788	2.0052	10.9075	0.0306	3.2226	4.5337	4.6083	1.4856	0.8178
