# Supplementary material for: Clinical Significance and Molecular Annotation of Cellular Morphometric Subtypes in Lower Grade Gliomas discovered by Machine Learning: a retrospective multicentric study
Source: Research Square preprint supplement (doi:10.21203/rs.3.rs-770415/v2), 2021-08-16
Supplement: Supplementary file 29 [file 5ec3bea407f3b04dc8f8e2d8.docx]

**Supplementary Table 15. Cox proportional hazards regression model on the overall survival of patients in SU-LGG cohort**

| Variable | Univariate analysis | | | |  | Multivariate analysis | | | |
| --- | --- | --- | --- | --- | --- | --- | --- | --- | --- |
| HR | LCI | UCI | P value |  | HR | LCI | UCI | P value |
| Subtype 2 vs 1 | 6.716 | 1.465 | 30.777 | 0.014 |  | 9.392 | 1.944 | 45.373 | 0.005 |
| Age | 1.03 | 1 | 1.061 | 0.051 |  | 1.036 | 1.007 | 1.066 | 0.016 |
| Grade | 4.449 | 1.367 | 14.483 | 0.013 |  | 3.701 | 1.13 | 12.118 | 0.031 |
| Gender male vs female | 0.849 | 0.285 | 2.531 | 0.769 |  | NA | | | |
| Histology type oligodendroglioma vs astrocytoma | 0 | 0 | Inf | 0.998 |  | NA | | | |
| Laterality right vs left | 2.214 | 0.57 | 8.598 | 0.251 |  | NA | | | |

**Abbreviations:** HR, hazards ratio; LCI, lower limit of 95% confidence interval; UCI, upper limit of 95% confidence interval
