# Supplementary material for: Clinical Significance and Molecular Annotation of Cellular Morphometric Subtypes in Lower Grade Gliomas discovered by Machine Learning: a retrospective multicentric study
Source: Research Square preprint supplement (doi:10.21203/rs.3.rs-770415/v2), 2021-08-16
Supplement: Supplementary file 31 [file cc98ea8ea53f4b8d2095fa50.docx]

**Supplementary Table 2. Clinical characteristics of patients in ZN-LGG cohort**

|  | **Subtype 1 (N=38)** | **Subtype 2 (N=32)** | **P value** | | **Overall (N=70)** |
| --- | --- | --- | --- | --- | --- |
| **Age (years)** |  |  |  |  | |
| Mean (SD) | 45.4 (11.4) | 45.4 (15.8) | 0.984 | 45.4 (13.5) | |
| Median [Min, Max] | 45.0 [23.0, 67.0] | 48.5 [6.00, 72.0] |  | 47.0 [6.00, 72.0] | |
| **Gender [No. (%)]** |  |  |  |  | |
| Female | 16 (42.1%) | 18 (56.2%) | 0.347 | 34 (48.6%) | |
| Male | 22 (57.9%) | 14 (43.8%) |  | 36 (51.4%) | |
| **Grade** |  |  |  |  | |
| 2 | 18 (47.4%) | 19 (59.4%) | 0.446 | 37 (52.9%) | |
| 3 | 20 (52.6%) | 13 (40.6%) |  | 33 (47.1%) | |
| **Histological type [No. (%)]** | | | | | |
| Astrocytoma | 18 (47.4%) | 24 (75.0%) | 0.052 | 42 (60.0%) | |
| Oligodendroglioma | 19 (50.0%) | 7 (21.9%) |  | 26 (37.1%) | |
| Oligoastrocytoma | 1 (2.6%) | 1 (3.1%) |  | 2 (2.9%) | |
