# Supplementary material for: Clinical Significance and Molecular Annotation of Cellular Morphometric Subtypes in Lower Grade Gliomas discovered by Machine Learning: a retrospective multicentric study
Source: Research Square preprint supplement (doi:10.21203/rs.3.rs-770415/v2), 2021-08-16
Supplement: Supplementary file 32 [file cd4e1cbd9f044e0862c38ed9.xlsx]

## Sheet: Sheet1
Supplementary Table 21. Gene ontology (GO) functional enrichment analysis of the differentially expressed genes (DEGs) for biological processes.
ID	Description	GeneRatio	BgRatio	pvalue	p.adjust	qvalue	geneID	Count
GO:0070268	cornification	18/258	112/18670	1.66045e-14	5.46953e-11	4.77336e-11	DSG2/DSG3/KRT1/KRT13/KRT14/KRT15/KRT16/KRT17/KRT24/KRT31/KRT33B/KRT5/KRT6B/KRT75/KRT79/KRT84/SPRR2A/SPRR2B	18
GO:0009913	epidermal cell differentiation	24/258	358/18670	1.94809e-10	3.2085e-07	2.80012e-07	ATOH1/CLRN1/DSG2/DSG3/KDF1/KRT1/KRT13/KRT14/KRT15/KRT16/KRT17/KRT24/KRT31/KRT33B/KRT5/KRT6B/KRT75/KRT79/KRT84/MCOLN3/PITX2/S100A7/SPRR2A/SPRR2B	24
GO:0008544	epidermis development	26/258	464/18670	1.57821e-09	1.73287e-06	1.51231e-06	ALX4/ATOH1/CLRN1/DSG2/DSG3/FGF7/KDF1/KRT1/KRT13/KRT14/KRT15/KRT16/KRT17/KRT24/KRT31/KRT33B/KRT5/KRT6B/KRT75/KRT79/KRT84/MCOLN3/PITX2/S100A7/SPRR2A/SPRR2B	26
GO:0031424	keratinization	18/258	224/18670	2.30775e-09	1.90043e-06	1.65855e-06	DSG2/DSG3/KRT1/KRT13/KRT14/KRT15/KRT16/KRT17/KRT24/KRT31/KRT33B/KRT5/KRT6B/KRT75/KRT79/KRT84/SPRR2A/SPRR2B	18
GO:0030216	keratinocyte differentiation	20/258	305/18670	9.80128e-09	6.45709e-06	5.63522e-06	DSG2/DSG3/KDF1/KRT1/KRT13/KRT14/KRT15/KRT16/KRT17/KRT24/KRT31/KRT33B/KRT5/KRT6B/KRT75/KRT79/KRT84/S100A7/SPRR2A/SPRR2B	20
GO:0043588	skin development	23/258	419/18670	2.13016e-08	1.16946e-05	1.02061e-05	ALX4/DSG2/DSG3/FGF7/KDF1/KRT1/KRT13/KRT14/KRT15/KRT16/KRT17/KRT24/KRT31/KRT33B/KRT5/KRT6B/KRT75/KRT79/KRT84/MET/S100A7/SPRR2A/SPRR2B	23
GO:0019730	antimicrobial humoral response	12/258	122/18670	1.26961e-07	5.97441e-05	5.21398e-05	BPIFB1/CXCL1/CXCL6/FGB/IGHM/ITLN1/KLK3/LCN2/PRTN3/S100A7/SEMG1/SEMG2	12
GO:0050817	coagulation	18/258	342/18670	1.40609e-06	0.000578957	0.000505267	ADTRP/ANXA8/CSRP1/F13B/FGB/FGG/H3C14/HNF4A/IL6/KLKB1/KNG1/KRT1/P2RX2/PRTN3/SEMG1/SEMG2/SERPINA5/TFPI2	18
GO:0006959	humoral immune response	18/258	356/18670	2.48189e-06	0.00090837	0.000792752	BPIFB1/CFHR5/CRP/CXCL1/CXCL6/FGB/IGHG4/IGHM/IGHV4-31/IL6/ITLN1/KLK3/KRT1/LCN2/PRTN3/S100A7/SEMG1/SEMG2	18
GO:1900003	regulation of serine-type endopeptidase activity	4/258	11/18670	1.08937e-05	0.00326217	0.00284695	ANXA8L1/ANXA8/SEMG1/SEMG2	4
GO:1902571	regulation of serine-type peptidase activity	4/258	11/18670	1.08937e-05	0.00326217	0.00284695	ANXA8L1/ANXA8/SEMG1/SEMG2	4
GO:0045109	intermediate filament organization	5/258	23/18670	1.33065e-05	0.00365262	0.00318771	DES/KRT14/KRT17/NEFL/NEFM	5
GO:0007596	blood coagulation	16/258	336/18670	1.90595e-05	0.00482938	0.00421469	ADTRP/ANXA8/CSRP1/F13B/FGB/FGG/H3C14/HNF4A/IL6/KLKB1/KNG1/KRT1/P2RX2/PRTN3/SERPINA5/TFPI2	16
GO:0007599	hemostasis	16/258	341/18670	2.28275e-05	0.00537099	0.00468736	ADTRP/ANXA8/CSRP1/F13B/FGB/FGG/H3C14/HNF4A/IL6/KLKB1/KNG1/KRT1/P2RX2/PRTN3/SERPINA5/TFPI2	16
GO:0003073	regulation of systemic arterial blood pressure	8/258	93/18670	4.41226e-05	0.00968931	0.00845605	ADAMTS16/CRH/DRD3/KLK2/KLK3/OR51E2/P2RX2/POSTN	8
GO:0002675	positive regulation of acute inflammatory response	5/258	31/18670	6.13889e-05	0.0121545	0.0106075	C2CD4A/CREB3L3/IL6/KLKB1/PTGS2	5
GO:0045104	intermediate filament cytoskeleton organization	6/258	50/18670	6.27282e-05	0.0121545	0.0106075	DES/KRT14/KRT16/KRT17/NEFL/NEFM	6
GO:0045103	intermediate filament-based process	6/258	51/18670	7.02768e-05	0.012556	0.0109579	DES/KRT14/KRT16/KRT17/NEFL/NEFM	6
GO:0070372	regulation of ERK1 and ERK2 cascade	14/258	300/18670	7.87005e-05	0.012556	0.0109579	ALOX15/C1QL4/RIPK2/CCL18/CCL24/CHI3L1/FGB/FGG/IL26/MARCO/PTPRR/ROS1/S100A7/THPO	14
GO:0030195	negative regulation of blood coagulation	6/258	53/18670	8.75431e-05	0.012556	0.0109579	ADTRP/FGB/FGG/KLKB1/KNG1/KRT1	6
GO:0031638	zymogen activation	6/258	53/18670	8.75431e-05	0.012556	0.0109579	RIPK2/FGB/FGG/KLK2/KLK3/KLKB1	6
GO:0045110	intermediate filament bundle assembly	3/258	7/18670	8.76245e-05	0.012556	0.0109579	KRT14/NEFL/NEFM	3
GO:0031960	response to corticosteroid	10/258	162/18670	8.7671e-05	0.012556	0.0109579	AGXT/APOA2/CRH/CSN1S1/IL22/IL6/NEFL/NPAS4/PTGS2/SSTR3	10
GO:0060192	negative regulation of lipase activity	4/258	18/18670	9.35938e-05	0.0128278	0.0111951	ANXA8L1/ANXA8/APOA2/APOC3	4
GO:1900047	negative regulation of hemostasis	6/258	54/18670	9.73575e-05	0.0128278	0.0111951	ADTRP/FGB/FGG/KLKB1/KNG1/KRT1	6
GO:0008306	associative learning	7/258	78/18670	0.000101629	0.0128756	0.0112368	CCK/CRH/DRD3/NEUROD2/NPS/NRGN/TBR1	7
GO:0050819	negative regulation of coagulation	6/258	57/18670	0.000132145	0.0161217	0.0140697	ADTRP/FGB/FGG/KLKB1/KNG1/KRT1	6
GO:0070371	ERK1 and ERK2 cascade	14/258	317/18670	0.000140687	0.0165508	0.0144442	ALOX15/C1QL4/RIPK2/CCL18/CCL24/CHI3L1/FGB/FGG/IL26/MARCO/PTPRR/ROS1/S100A7/THPO	14
GO:0042303	molting cycle	8/258	112/18670	0.00016449	0.0180611	0.0157622	ALX4/FGF7/KRT14/KRT16/KRT17/KRT33B/KRT84/PTGS2	8
GO:0042633	hair cycle	8/258	112/18670	0.00016449	0.0180611	0.0157622	ALX4/FGF7/KRT14/KRT16/KRT17/KRT33B/KRT84/PTGS2	8
GO:0007612	learning	9/258	145/18670	0.000189224	0.0187535	0.0163665	CCK/CRH/DRD3/NEUROD2/NPAS4/NPS/NRGN/PTGS2/TBR1	9
GO:0060621	negative regulation of cholesterol import	2/258	2/18670	0.000190234	0.0187535	0.0163665	APOA2/APOC3	2
GO:2000910	negative regulation of sterol import	2/258	2/18670	0.000190234	0.0187535	0.0163665	APOA2/APOC3	2
GO:0010951	negative regulation of endopeptidase activity	12/258	250/18670	0.000196122	0.0187535	0.0163665	AMBP/ANXA8L1/ANXA8/CPAMD8/KNG1/LCN1/PAX2/PTGS2/SERPINA5/SERPINB5/TFPI2/WFIKKN2	12
GO:0051384	response to glucocorticoid	9/258	146/18670	0.000199263	0.0187535	0.0163665	AGXT/APOA2/CRH/IL22/IL6/NEFL/NPAS4/PTGS2/SSTR3	9
GO:0070374	positive regulation of ERK1 and ERK2 cascade	11/258	215/18670	0.000208472	0.0189806	0.0165648	ALOX15/RIPK2/CCL18/CCL24/CHI3L1/FGB/FGG/IL26/MARCO/S100A7/THPO	11
GO:0042742	defense response to bacterium	14/258	330/18670	0.000213201	0.0189806	0.0165648	RIPK2/CRP/CXCL6/FGB/IGHG4/IGHM/IGHV4-31/IL6/KLK3/LCN2/LYZL6/S100A7/SEMG1/SEMG2	14
GO:0002526	acute inflammatory response	11/258	220/18670	0.000254259	0.0216654	0.0189078	APOA2/C2CD4A/CFHR5/CREB3L3/CRP/DNASE1L3/IGHG4/IL22/IL6/KLKB1/PTGS2	11
GO:0061436	establishment of skin barrier	4/258	23/18670	0.000256512	0.0216654	0.0189078	KDF1/KRT1/KRT16/MET	4
GO:0052548	regulation of endopeptidase activity	16/258	425/18670	0.000296869	0.0242134	0.0211315	AMBP/ANXA8L1/ANXA8/RIPK2/CCK/CPAMD8/KNG1/LCN1/PAX2/PTGS2/SEMG1/SEMG2/SERPINA5/SERPINB5/TFPI2/WFIKKN2	16
GO:0010466	negative regulation of peptidase activity	12/258	262/18670	0.000301381	0.0242134	0.0211315	AMBP/ANXA8L1/ANXA8/CPAMD8/KNG1/LCN1/PAX2/PTGS2/SERPINA5/SERPINB5/TFPI2/WFIKKN2	12
GO:0050708	regulation of protein secretion	17/258	472/18670	0.000322784	0.0253155	0.0220933	ADTRP/APOA2/RIPK2/CIDEA/CRH/CRP/DRD3/FGB/FGG/HNF4A/IL26/IL6/MIR149/OR51E2/POSTN/VSNL1/CCN4	17
GO:0035270	endocrine system development	8/258	127/18670	0.000388365	0.0297506	0.0259639	CRH/HNF4A/HOXB3/IL6/PITX2/SIX3/SLC6A3/TBX1	8
GO:0019731	antibacterial humoral response	5/258	46/18670	0.000418357	0.0306854	0.0267798	FGB/IGHM/KLK3/SEMG1/SEMG2	5
GO:0033561	regulation of water loss via skin	4/258	26/18670	0.0004192	0.0306854	0.0267798	KDF1/KRT1/KRT16/MET	4
GO:0072376	protein activation cascade	10/258	198/18670	0.000446042	0.0319405	0.0278751	CFHR5/CRP/FGB/FGG/IGHG4/IGHM/IGHV4-31/KLKB1/KNG1/KRT1	10
GO:0072378	blood coagulation, fibrin clot formation	4/258	27/18670	0.000486797	0.0338673	0.0295567	FGB/FGG/KLKB1/KNG1	4
GO:0042730	fibrinolysis	4/258	28/18670	0.000561808	0.0338673	0.0295567	FGB/FGG/KLKB1/KRT1	4
GO:0010841	positive regulation of circadian sleep/wake cycle, wakefulness	2/258	3/18670	0.000565484	0.0338673	0.0295567	CRH/NPS	2
GO:0010903	negative regulation of very-low-density lipoprotein particle remodeling	2/258	3/18670	0.000565484	0.0338673	0.0295567	APOA2/APOC3	2
GO:0030573	bile acid catabolic process	2/258	3/18670	0.000565484	0.0338673	0.0295567	AKR1D1/SULT2A1	2
GO:0033693	neurofilament bundle assembly	2/258	3/18670	0.000565484	0.0338673	0.0295567	NEFL/NEFM	2
GO:0035633	maintenance of permeability of blood-brain barrier	2/258	3/18670	0.000565484	0.0338673	0.0295567	IL6/PTGS2	2
GO:1900005	positive regulation of serine-type endopeptidase activity	2/258	3/18670	0.000565484	0.0338673	0.0295567	SEMG1/SEMG2	2
GO:1902573	positive regulation of serine-type peptidase activity	2/258	3/18670	0.000565484	0.0338673	0.0295567	SEMG1/SEMG2	2
GO:0052547	regulation of peptidase activity	16/258	452/18670	0.000581522	0.034206	0.0298522	AMBP/ANXA8L1/ANXA8/RIPK2/CCK/CPAMD8/KNG1/LCN1/PAX2/PTGS2/SEMG1/SEMG2/SERPINA5/SERPINB5/TFPI2/WFIKKN2	16
GO:0002791	regulation of peptide secretion	17/258	500/18670	0.000620193	0.0358406	0.0312788	ADTRP/APOA2/RIPK2/CIDEA/CRH/CRP/DRD3/FGB/FGG/HNF4A/IL26/IL6/MIR149/OR51E2/POSTN/VSNL1/CCN4	17
GO:0061045	negative regulation of wound healing	6/258	76/18670	0.000639981	0.0363465	0.0317203	ADTRP/FGB/FGG/KLKB1/KNG1/KRT1	6
GO:0007586	digestion	8/258	139/18670	0.00070805	0.0395308	0.0344993	AKR1D1/APOA2/CCK/CLPS/CLPSL1/CRH/DRD3/MUC2	8
GO:0030193	regulation of blood coagulation	6/258	79/18670	0.000786207	0.0431627	0.0376689	ADTRP/FGB/FGG/KLKB1/KNG1/KRT1	6
GO:1900046	regulation of hemostasis	6/258	80/18670	0.000840274	0.0453748	0.0395995	ADTRP/FGB/FGG/KLKB1/KNG1/KRT1	6
GO:0007611	learning or memory	11/258	256/18670	0.000904942	0.0480787	0.0419592	CCK/CRH/DNAH11/DRD3/NEUROD2/NPAS4/NPS/NRGN/NTF3/PTGS2/TBR1	11
GO:0051385	response to mineralocorticoid	4/258	32/18670	0.000944883	0.0494039	0.0431157	CRH/CSN1S1/NEFL/NPAS4	4
GO:0048545	response to steroid hormone	14/258	385/18670	0.000983153	0.0503011	0.0438988	ADTRP/AGXT/APOA2/CRH/CSN1S1/DSG2/HNF4A/IL22/IL6/NEFL/NPAS4/OR51E2/PTGS2/SSTR3	14
GO:0008217	regulation of blood pressure	9/258	182/18670	0.000992585	0.0503011	0.0438988	ADAMTS16/CRH/DRD3/KLK2/KLK3/OR51E2/P2RX2/POSTN/PTGS2	9
GO:0050818	regulation of coagulation	6/258	84/18670	0.00108576	0.0512692	0.0447437	ADTRP/FGB/FGG/KLKB1/KNG1/KRT1	6
GO:0010840	regulation of circadian sleep/wake cycle, wakefulness	2/258	4/18670	0.00112064	0.0512692	0.0447437	CRH/NPS	2
GO:0042746	circadian sleep/wake cycle, wakefulness	2/258	4/18670	0.00112064	0.0512692	0.0447437	CRH/NPS	2
GO:0060620	regulation of cholesterol import	2/258	4/18670	0.00112064	0.0512692	0.0447437	APOA2/APOC3	2
GO:1900138	negative regulation of phospholipase A2 activity	2/258	4/18670	0.00112064	0.0512692	0.0447437	ANXA8L1/ANXA8	2
GO:1901318	negative regulation of flagellated sperm motility	2/258	4/18670	0.00112064	0.0512692	0.0447437	SEMG1/SEMG2	2
GO:2000909	regulation of sterol import	2/258	4/18670	0.00112064	0.0512692	0.0447437	APOA2/APOC3	2
GO:0034116	positive regulation of heterotypic cell-cell adhesion	3/258	16/18670	0.00127851	0.0576907	0.0503478	ALOX15/FGB/FGG	3
GO:0050729	positive regulation of inflammatory response	8/258	153/18670	0.0013189	0.0587091	0.0512365	C2CD4A/CCL18/CCL24/CREB3L3/IL6/KLKB1/PTGS2/CCN4	8
GO:0043491	protein kinase B signaling	11/258	269/18670	0.00134898	0.0592474	0.0517063	ADTRP/CHI3L1/CSF3/DRD3/FGF7/IL26/MET/MYOC/PAX2/SFRP5/THPO	11
GO:0010876	lipid localization	14/258	400/18670	0.00141167	0.0611848	0.0533971	ABCB11/APOA2/APOC3/CIDEA/CRH/CRP/DRD3/IL6/LCN1/PLA2G4F/SERPINA5/SFTPA1/SLC22A9/SLCO1B1	14
GO:1901317	regulation of flagellated sperm motility	3/258	17/18670	0.00153671	0.0655772	0.0572305	SEMG1/SEMG2/TEX101	3
GO:1903035	negative regulation of response to wounding	6/258	90/18670	0.00155283	0.0655772	0.0572305	ADTRP/FGB/FGG/KLKB1/KNG1/KRT1	6
GO:0002673	regulation of acute inflammatory response	8/258	159/18670	0.00168399	0.0702162	0.061279	C2CD4A/CFHR5/CREB3L3/DNASE1L3/IGHG4/IL6/KLKB1/PTGS2	8
GO:0008628	hormone-mediated apoptotic signaling pathway	2/258	5/18670	0.00185069	0.0723123	0.0631084	CRH/SSTR3	2
GO:0010901	regulation of very-low-density lipoprotein particle remodeling	2/258	5/18670	0.00185069	0.0723123	0.0631084	APOA2/APOC3	2
GO:0070948	regulation of neutrophil mediated cytotoxicity	2/258	5/18670	0.00185069	0.0723123	0.0631084	CXCL6/DNASE1L3	2
GO:0072025	distal convoluted tubule development	2/258	5/18670	0.00185069	0.0723123	0.0631084	PAX2/UMOD	2
GO:0072221	metanephric distal convoluted tubule development	2/258	5/18670	0.00185069	0.0723123	0.0631084	PAX2/UMOD	2
GO:0032103	positive regulation of response to external stimulus	12/258	323/18670	0.00186598	0.0723123	0.0631084	C2CD4A/RIPK2/CCL18/CCL24/CREB3L3/IL6/KLKB1/MET/NTF3/PTGS2/S100A7/CCN4	12
GO:0048663	neuron fate commitment	5/258	65/18670	0.0020382	0.0780676	0.0681311	ATOH1/DBX1/DMRTA2/PAX7/TBR1	5
GO:0046677	response to antibiotic	12/258	327/18670	0.0020664	0.0782382	0.0682799	ACTC1/CA3/CRH/CSF3/IL6/LCN2/MET/NEFL/PAX2/PLA2G4F/SLC6A3/TRPA1	12
GO:0050954	sensory perception of mechanical stimulus	8/258	165/18670	0.0021248	0.0795352	0.0694119	CEACAM16/CLRN1/COL2A1/ESPN/GJB6/P2RX2/TBX1/TRPA1	8
GO:0051346	negative regulation of hydrolase activity	15/258	466/18670	0.00218525	0.0806175	0.0703565	AMBP/ANXA8L1/ANXA8/APOA2/APOC3/CPAMD8/KNG1/LCN1/PAX2/PTGS2/SERPINA5/SERPINB5/TFPI2/TNNT2/WFIKKN2	15
GO:0035315	hair cell differentiation	4/258	40/18670	0.00220266	0.0806175	0.0703565	ATOH1/CLRN1/MCOLN3/PITX2	4
GO:0060191	regulation of lipase activity	6/258	98/18670	0.00239624	0.0853237	0.0744637	ANXA8L1/ANXA8/APOA2/APOC3/NTF3/SELE	6
GO:0016042	lipid catabolic process	12/258	333/18670	0.00239983	0.0853237	0.0744637	ADTRP/AKR1D1/APOA2/APOC3/CIDEA/CLPS/CLPSL1/CYP26A1/LIPF/PLA2G4F/PLCZ1/SULT2A1	12
GO:0070555	response to interleukin-1	9/258	207/18670	0.00240896	0.0853237	0.0744637	RIPK2/CCL18/CCL24/CHI3L1/FGB/FGG/IL6/LCN2/SELE	9
GO:0001708	cell fate specification	6/258	99/18670	0.00252193	0.0883747	0.0771263	ATOH1/DBX1/DMRTA2/PAX2/TBR1/TBX1	6
GO:0035634	response to stilbenoid	2/258	6/18670	0.00275075	0.0953786	0.0832387	CIDEA/LY6D	2
GO:0050890	cognition	11/258	296/18670	0.0028479	0.0969898	0.0846449	CCK/CRH/DNAH11/DRD3/NEUROD2/NPAS4/NPS/NRGN/NTF3/PTGS2/TBR1	11
GO:0042749	regulation of circadian sleep/wake cycle	3/258	21/18670	0.00288555	0.0969898	0.0846449	CRH/DRD3/NPS	3
GO:0051412	response to corticosterone	3/258	21/18670	0.00288555	0.0969898	0.0846449	CRH/NEFL/NPAS4	3
GO:0015711	organic anion transport	15/258	482/18670	0.00300724	0.100059	0.0873234	ABCB11/AGXT/APOA2/APOC3/CA3/CA4/CALHM1/CCK/DRD3/LCN1/PLA2G4F/SLC22A9/SLC6A18/SLC6A7/SLCO1B1	15
GO:0048871	multicellular organismal homeostasis	15/258	485/18670	0.00318667	0.10393	0.0907014	CIDEA/CLRN1/COL2A1/IL6/KDF1/KRT1/KRT16/LCN1/LCN2/MET/MUC2/PHOX2B/PTGS2/RHO/SFTPA1	15
GO:0050727	regulation of inflammatory response	15/258	485/18670	0.00318667	0.10393	0.0907014	C2CD4A/CCL18/CCL24/CFHR5/CREB3L3/DNASE1L3/IGHG4/IL6/KLKB1/KRT1/MAS1/MIR149/PTGS2/SELE/CCN4	15
GO:0033138	positive regulation of peptidyl-serine phosphorylation	6/258	105/18670	0.00338288	0.106699	0.093118	RIPK2/SH2D3C/CSF3/IL6/NTF3/PTGS2	6
GO:0033555	multicellular organismal response to stress	5/258	73/18670	0.00339045	0.106699	0.093118	CCK/CRH/NEUROD2/P2RX2/TRPA1	5
GO:0061844	antimicrobial humoral immune response mediated by antimicrobial peptide	5/258	73/18670	0.00339045	0.106699	0.093118	CXCL1/CXCL6/KLK3/S100A7/SEMG1	5
GO:0007601	visual perception	9/258	218/18670	0.00340114	0.106699	0.093118	CLRN1/COL2A1/GUCA1C/KERA/PAX2/PRPH2/RHO/SFRP5/SIX3	9
GO:0097530	granulocyte migration	7/258	141/18670	0.00349243	0.107969	0.0942267	CCL18/CCL24/CXCL1/CXCL6/PRTN3/S100A7/UMOD	7
GO:0071347	cellular response to interleukin-1	8/258	179/18670	0.00350719	0.107969	0.0942267	RIPK2/CCL18/CCL24/CHI3L1/FGB/FGG/IL6/LCN2	8
GO:0048512	circadian behavior	4/258	46/18670	0.00368714	0.110743	0.0966476	CRH/DRD3/NPS/SIX3	4
GO:0022410	circadian sleep/wake cycle process	3/258	23/18670	0.00376497	0.110743	0.0966476	CRH/DRD3/NPS	3
GO:0050995	negative regulation of lipid catabolic process	3/258	23/18670	0.00376497	0.110743	0.0966476	APOA2/APOC3/CIDEA	3
GO:0072235	metanephric distal tubule development	2/258	7/18670	0.003816	0.110743	0.0966476	PAX2/UMOD	2
GO:1903367	positive regulation of fear response	2/258	7/18670	0.003816	0.110743	0.0966476	CCK/CRH	2
GO:2000987	positive regulation of behavioral fear response	2/258	7/18670	0.003816	0.110743	0.0966476	CCK/CRH	2
GO:0050953	sensory perception of light stimulus	9/258	222/18670	0.00383264	0.110743	0.0966476	CLRN1/COL2A1/GUCA1C/KERA/PAX2/PRPH2/RHO/SFRP5/SIX3	9
GO:0006953	acute-phase response	4/258	47/18670	0.00398707	0.113219	0.0988084	CRP/IL22/IL6/PTGS2	4
GO:0007622	rhythmic behavior	4/258	47/18670	0.00398707	0.113219	0.0988084	CRH/DRD3/NPS/SIX3	4
GO:0007605	sensory perception of sound	7/258	145/18670	0.00407317	0.114675	0.100079	CEACAM16/CLRN1/COL2A1/ESPN/GJB6/P2RX2/TBX1	7
GO:0016101	diterpenoid metabolic process	6/258	110/18670	0.0042534	0.118735	0.103622	APOA2/APOC3/CLPS/CRH/CYP26A1/RHO	6
GO:0002792	negative regulation of peptide secretion	7/258	148/18670	0.00455466	0.125025	0.109112	ADTRP/APOA2/CIDEA/CRH/DRD3/MIR149/VSNL1	7
GO:0061041	regulation of wound healing	7/258	148/18670	0.00455466	0.125025	0.109112	ADTRP/FGB/FGG/KLKB1/KNG1/KRT1/CCN4	7
GO:0021675	nerve development	5/258	79/18670	0.0047592	0.128138	0.111829	HOXB3/NTF3/PAX2/PHOX2B/TBX1	5
GO:0045861	negative regulation of proteolysis	12/258	363/18670	0.00478848	0.128138	0.111829	AMBP/ANXA8L1/ANXA8/CPAMD8/KNG1/LCN1/PAX2/PTGS2/SERPINA5/SERPINB5/TFPI2/WFIKKN2	12
GO:0031639	plasminogen activation	3/258	25/18670	0.00479124	0.128138	0.111829	FGB/FGG/KLKB1	3
GO:0009743	response to carbohydrate	9/258	230/18670	0.00482367	0.128138	0.111829	APOA2/CRH/GJB6/HNF4A/MAFA/P2RX2/PAX2/PTGS2/VSNL1	9
GO:0070741	response to interleukin-6	4/258	50/18670	0.00498488	0.131361	0.114642	CHI3L1/FGG/IL6/MIR149	4
GO:0010519	negative regulation of phospholipase activity	2/258	8/18670	0.00504174	0.131806	0.115029	ANXA8L1/ANXA8	2
GO:0048839	inner ear development	8/258	192/18670	0.00533665	0.132788	0.115887	ATOH1/CLRN1/COL2A1/GJB6/MCOLN3/PAX2/PHOX2B/TBX1	8
GO:0050731	positive regulation of peptidyl-tyrosine phosphorylation	8/258	192/18670	0.00533665	0.132788	0.115887	RIPK2/CCK/CSF3/FGF7/IL31RA/IL6/NTF3/TNFSF18	8
GO:0021545	cranial nerve development	4/258	51/18670	0.00535143	0.132788	0.115887	HOXB3/PAX2/PHOX2B/TBX1	4
GO:0006309	apoptotic DNA fragmentation	3/258	26/18670	0.0053615	0.132788	0.115887	CIDEA/DNASE1L3/IL6	3
GO:0034114	regulation of heterotypic cell-cell adhesion	3/258	26/18670	0.0053615	0.132788	0.115887	ALOX15/FGB/FGG	3
GO:0042745	circadian sleep/wake cycle	3/258	26/18670	0.0053615	0.132788	0.115887	CRH/DRD3/NPS	3
GO:0051497	negative regulation of stress fiber assembly	3/258	26/18670	0.0053615	0.132788	0.115887	MET/MIR149/MYOC	3
GO:0060415	muscle tissue morphogenesis	5/258	82/18670	0.00557321	0.137001	0.119563	ACTC1/PAX7/SHOX2/TBX1/TNNT2	5
GO:1900024	regulation of substrate adhesion-dependent cell spreading	4/258	52/18670	0.00573558	0.139948	0.122136	FGB/FGG/MYOC/POSTN	4
GO:0042471	ear morphogenesis	6/258	118/18670	0.00597568	0.143678	0.125391	ATOH1/CLRN1/COL2A1/GJB6/PAX2/TBX1	6
GO:1990266	neutrophil migration	6/258	118/18670	0.00597568	0.143678	0.125391	CCL18/CCL24/CXCL1/CXCL6/PRTN3/UMOD	6
GO:0043062	extracellular structure organization	13/258	422/18670	0.00606423	0.14475	0.126326	ADTRP/APOA2/APOC3/COL2A1/FGB/FGG/IL6/KLK2/KLKB1/KLK4/MYH11/POSTN/SERPINB5	13
GO:0050663	cytokine secretion	9/258	240/18670	0.00633053	0.146935	0.128233	APOA2/RIPK2/CHI3L1/CIDEA/CRP/IL26/MIR149/POSTN/CCN4	9
GO:0034371	chylomicron remodeling	2/258	9/18670	0.00642338	0.146935	0.128233	APOA2/APOC3	2
GO:1900004	negative regulation of serine-type endopeptidase activity	2/258	9/18670	0.00642338	0.146935	0.128233	ANXA8L1/ANXA8	2
GO:1902572	negative regulation of serine-type peptidase activity	2/258	9/18670	0.00642338	0.146935	0.128233	ANXA8L1/ANXA8	2
GO:1903365	regulation of fear response	2/258	9/18670	0.00642338	0.146935	0.128233	CCK/CRH	2
GO:2000822	regulation of behavioral fear response	2/258	9/18670	0.00642338	0.146935	0.128233	CCK/CRH	2
GO:0006721	terpenoid metabolic process	6/258	120/18670	0.00647571	0.14711	0.128386	APOA2/APOC3/CLPS/CRH/CYP26A1/RHO	6
GO:0006636	unsaturated fatty acid biosynthetic process	4/258	54/18670	0.00655812	0.147962	0.129129	ALOX15/FADS1/PLA2G4F/PTGS2	4
GO:0048520	positive regulation of behavior	3/258	28/18670	0.00661993	0.14834	0.12946	CCK/CRH/NPS	3
GO:0048562	embryonic organ morphogenesis	10/258	288/18670	0.00695283	0.153262	0.133754	ALX4/ATOH1/CLRN1/COL2A1/GJB6/HOXB3/PAX2/SHOX2/SIX3/TBX1	10
GO:0030900	forebrain development	12/258	381/18670	0.00695581	0.153262	0.133754	ATOH1/CRH/DMRTA2/MAS1/NEFL/NEUROD6/NRGN/PITX2/SIX3/SLC6A3/SSTR3/TBR1	12
GO:0046456	icosanoid biosynthetic process	4/258	55/18670	0.00699719	0.153262	0.133754	ALOX15/FADS1/PLA2G4F/PTGS2	4
GO:0051896	regulation of protein kinase B signaling	9/258	244/18670	0.00702565	0.153262	0.133754	CHI3L1/CSF3/DRD3/FGF7/IL26/MET/MYOC/SFRP5/THPO	9
GO:0009746	response to hexose	8/258	202/18670	0.00718159	0.155633	0.135824	APOA2/CRH/GJB6/HNF4A/MAFA/PAX2/PTGS2/VSNL1	8
GO:0021602	cranial nerve morphogenesis	3/258	29/18670	0.00730938	0.1561	0.136231	HOXB3/PAX2/TBX1	3
GO:0032232	negative regulation of actin filament bundle assembly	3/258	29/18670	0.00730938	0.1561	0.136231	MET/MIR149/MYOC	3
GO:0048644	muscle organ morphogenesis	5/258	88/18670	0.00748749	0.1561	0.136231	ACTC1/PAX7/SHOX2/TBX1/TNNT2	5
GO:0050829	defense response to Gram-negative bacterium	5/258	88/18670	0.00748749	0.1561	0.136231	CXCL6/IGHM/IL6/LYZL6/S100A7	5
GO:0070098	chemokine-mediated signaling pathway	5/258	88/18670	0.00748749	0.1561	0.136231	CCL18/CCL24/CXCL1/CXCL6/THPO	5
GO:0098773	skin epidermis development	5/258	88/18670	0.00748749	0.1561	0.136231	ALX4/FGF7/KDF1/KRT17/KRT84	5
GO:0034378	chylomicron assembly	2/258	10/18670	0.00795639	0.158838	0.138621	APOA2/APOC3	2
GO:0035376	sterol import	2/258	10/18670	0.00795639	0.158838	0.138621	APOA2/APOC3	2
GO:0051901	positive regulation of mitochondrial depolarization	2/258	10/18670	0.00795639	0.158838	0.138621	CCK/MYOC	2
GO:0070091	glucagon secretion	2/258	10/18670	0.00795639	0.158838	0.138621	CRH/IL6	2
GO:0070508	cholesterol import	2/258	10/18670	0.00795639	0.158838	0.138621	APOA2/APOC3	2
GO:0070942	neutrophil mediated cytotoxicity	2/258	10/18670	0.00795639	0.158838	0.138621	CXCL6/DNASE1L3	2
GO:2001054	negative regulation of mesenchymal cell apoptotic process	2/258	10/18670	0.00795639	0.158838	0.138621	PAX2/TBX1	2
GO:0048265	response to pain	3/258	30/18670	0.00803977	0.159536	0.13923	CRH/P2RX2/TRPA1	3
GO:0048706	embryonic skeletal system development	6/258	126/18670	0.00815806	0.160914	0.140433	ALX4/COL2A1/HOXB3/PAX7/SHOX2/TBX1	6
GO:0034284	response to monosaccharide	8/258	207/18670	0.00826732	0.162099	0.141467	APOA2/CRH/GJB6/HNF4A/MAFA/PAX2/PTGS2/VSNL1	8
GO:0001963	synaptic transmission, dopaminergic	3/258	31/18670	0.00881163	0.171749	0.149888	CRH/DRD3/PTGS2	3
GO:0050707	regulation of cytokine secretion	8/258	210/18670	0.0089753	0.172893	0.150887	APOA2/RIPK2/CIDEA/CRP/IL26/MIR149/POSTN/CCN4	8
GO:0097529	myeloid leukocyte migration	8/258	210/18670	0.0089753	0.172893	0.150887	CCL18/CCL24/CXCL1/CXCL6/IL6/PRTN3/S100A7/UMOD	8
GO:0048704	embryonic skeletal system morphogenesis	5/258	93/18670	0.00939903	0.175755	0.153385	ALX4/COL2A1/HOXB3/SHOX2/TBX1	5
GO:0007389	pattern specification process	13/258	446/18670	0.00941707	0.175755	0.153385	ALX4/BARX1/DBX1/DMRTA2/DNAH11/HOXB3/IRX4/PAX2/PAX7/PITX2/SIX3/TBR1/TBX1	13
GO:0018149	peptide cross-linking	4/258	60/18670	0.00948397	0.175755	0.153385	KRT1/SPRR2A/SPRR2B/TGM7	4
GO:0042491	inner ear auditory receptor cell differentiation	3/258	32/18670	0.00962543	0.175755	0.153385	ATOH1/CLRN1/MCOLN3	3
GO:0045907	positive regulation of vasoconstriction	3/258	32/18670	0.00962543	0.175755	0.153385	FGB/FGG/PTGS2	3
GO:0031915	positive regulation of synaptic plasticity	2/258	11/18670	0.00963637	0.175755	0.153385	NEUROD2/PTGS2	2
GO:0032494	response to peptidoglycan	2/258	11/18670	0.00963637	0.175755	0.153385	RIPK2/IL6	2
GO:0060272	embryonic skeletal joint morphogenesis	2/258	11/18670	0.00963637	0.175755	0.153385	COL2A1/SHOX2	2
GO:0003002	regionalization	11/258	351/18670	0.00991226	0.175755	0.153385	ALX4/BARX1/DBX1/DMRTA2/HOXB3/PAX2/PAX7/PITX2/SIX3/TBR1/TBX1	11
GO:0034113	heterotypic cell-cell adhesion	4/258	61/18670	0.0100418	0.175755	0.153385	ALOX15/DSG2/FGB/FGG	4
GO:1905953	negative regulation of lipid localization	4/258	61/18670	0.0100418	0.175755	0.153385	APOA2/APOC3/CRP/IL6	4
GO:0045598	regulation of fat cell differentiation	6/258	132/18670	0.0101339	0.175755	0.153385	C1QL4/IL6/PTGS2/PTPRQ/WIF1/CCN4	6
GO:0003018	vascular process in circulatory system	7/258	173/18670	0.0104016	0.175755	0.153385	C2CD4A/CRP/FGB/FGG/KNG1/NTS/PTGS2	7
GO:0055002	striated muscle cell development	7/258	173/18670	0.0104016	0.175755	0.153385	ACTC1/CSRP1/MYH11/P2RX2/SHOX2/TNNT2/WFIKKN2	7
GO:0007585	respiratory gaseous exchange	4/258	62/18670	0.0106205	0.175755	0.153385	ECEL1/PHOX2B/SFTPA1/SFTPB	4
GO:1990868	response to chemokine	5/258	97/18670	0.0111519	0.175755	0.153385	CCL18/CCL24/CXCL1/CXCL6/THPO	5
GO:1990869	cellular response to chemokine	5/258	97/18670	0.0111519	0.175755	0.153385	CCL18/CCL24/CXCL1/CXCL6/THPO	5
GO:0051897	positive regulation of protein kinase B signaling	7/258	176/18670	0.0113589	0.175755	0.153385	CHI3L1/CSF3/FGF7/IL26/MET/MYOC/THPO	7
GO:0043583	ear development	8/258	219/18670	0.0113719	0.175755	0.153385	ATOH1/CLRN1/COL2A1/GJB6/MCOLN3/PAX2/PHOX2B/TBX1	8
GO:0000737	DNA catabolic process, endonucleolytic	3/258	34/18670	0.0113806	0.175755	0.153385	CIDEA/DNASE1L3/IL6	3
GO:0048665	neuron fate specification	3/258	34/18670	0.0113806	0.175755	0.153385	ATOH1/DBX1/DMRTA2	3
GO:0000353	formation of quadruple SL/U4/U5/U6 snRNP	2/258	12/18670	0.011459	0.175755	0.153385	RNU4-1/RNU4-2	2
GO:0000365	mRNA trans splicing, via spliceosome	2/258	12/18670	0.011459	0.175755	0.153385	RNU4-1/RNU4-2	2
GO:0008228	opsonization	2/258	12/18670	0.011459	0.175755	0.153385	CRP/SFTPA1	2
GO:0031581	hemidesmosome assembly	2/258	12/18670	0.011459	0.175755	0.153385	KRT14/KRT5	2
GO:0032429	regulation of phospholipase A2 activity	2/258	12/18670	0.011459	0.175755	0.153385	ANXA8L1/ANXA8	2
GO:0033700	phospholipid efflux	2/258	12/18670	0.011459	0.175755	0.153385	APOA2/APOC3	2
GO:0034372	very-low-density lipoprotein particle remodeling	2/258	12/18670	0.011459	0.175755	0.153385	APOA2/APOC3	2
GO:0045291	mRNA trans splicing, SL addition	2/258	12/18670	0.011459	0.175755	0.153385	RNU4-1/RNU4-2	2
GO:0072017	distal tubule development	2/258	12/18670	0.011459	0.175755	0.153385	PAX2/UMOD	2
GO:1902510	regulation of apoptotic DNA fragmentation	2/258	12/18670	0.011459	0.175755	0.153385	CIDEA/IL6	2
GO:1904181	positive regulation of membrane depolarization	2/258	12/18670	0.011459	0.175755	0.153385	CCK/MYOC	2
GO:2001053	regulation of mesenchymal cell apoptotic process	2/258	12/18670	0.011459	0.175755	0.153385	PAX2/TBX1	2
GO:0042472	inner ear morphogenesis	5/258	98/18670	0.0116226	0.175755	0.153385	ATOH1/CLRN1/COL2A1/PAX2/TBX1	5
GO:0030262	apoptotic nuclear changes	3/258	35/18670	0.0123226	0.175755	0.153385	CIDEA/DNASE1L3/IL6	3
GO:1903034	regulation of response to wounding	7/258	179/18670	0.0123785	0.175755	0.153385	ADTRP/FGB/FGG/KLKB1/KNG1/KRT1/CCN4	7
GO:0002548	monocyte chemotaxis	4/258	65/18670	0.0124843	0.175755	0.153385	CCL18/CCL24/IL6/S100A7	4
GO:0050714	positive regulation of protein secretion	9/258	268/18670	0.012497	0.175755	0.153385	RIPK2/CRH/FGB/FGG/IL26/IL6/OR51E2/POSTN/VSNL1	9
GO:0006720	isoprenoid metabolic process	6/258	139/18670	0.0128435	0.175755	0.153385	APOA2/APOC3/CLPS/CRH/CYP26A1/RHO	6
GO:0033135	regulation of peptidyl-serine phosphorylation	6/258	139/18670	0.0128435	0.175755	0.153385	RIPK2/SH2D3C/CSF3/IL6/NTF3/PTGS2	6
GO:0006869	lipid transport	11/258	365/18670	0.0129808	0.175755	0.153385	ABCB11/APOA2/APOC3/CRH/DRD3/LCN1/PLA2G4F/SERPINA5/SFTPA1/SLC22A9/SLCO1B1	11
GO:0009635	response to herbicide	2/258	13/18670	0.01342	0.175755	0.153385	LCN2/NEFL	2
GO:0021978	telencephalon regionalization	2/258	13/18670	0.01342	0.175755	0.153385	DMRTA2/SIX3	2
GO:0021984	adenohypophysis development	2/258	13/18670	0.01342	0.175755	0.153385	PITX2/SLC6A3	2
GO:0097152	mesenchymal cell apoptotic process	2/258	13/18670	0.01342	0.175755	0.153385	PAX2/TBX1	2
GO:0050709	negative regulation of protein secretion	6/258	141/18670	0.0137027	0.175755	0.153385	ADTRP/APOA2/CIDEA/DRD3/MIR149/VSNL1	6
GO:0030198	extracellular matrix organization	11/258	368/18670	0.0137233	0.175755	0.153385	ADTRP/COL2A1/FGB/FGG/IL6/KLK2/KLKB1/KLK4/MYH11/POSTN/SERPINB5	11
GO:0001979	regulation of systemic arterial blood pressure by chemoreceptor signaling	1/258	1/18670	0.013819	0.175755	0.153385	P2RX2	1
GO:0002007	detection of hypoxic conditions in blood by chemoreceptor signaling	1/258	1/18670	0.013819	0.175755	0.153385	P2RX2	1
GO:0003027	regulation of systemic arterial blood pressure by carotid body chemoreceptor signaling	1/258	1/18670	0.013819	0.175755	0.153385	P2RX2	1
GO:0003029	detection of hypoxic conditions in blood by carotid body chemoreceptor signaling	1/258	1/18670	0.013819	0.175755	0.153385	P2RX2	1
GO:0010335	response to non-ionic osmotic stress	1/258	1/18670	0.013819	0.175755	0.153385	PTGS2	1
GO:0010987	negative regulation of high-density lipoprotein particle clearance	1/258	1/18670	0.013819	0.175755	0.153385	APOC3	1
GO:0014813	skeletal muscle satellite cell commitment	1/258	1/18670	0.013819	0.175755	0.153385	PAX7	1
GO:0016037	light absorption	1/258	1/18670	0.013819	0.175755	0.153385	RHO	1
GO:0016038	absorption of visible light	1/258	1/18670	0.013819	0.175755	0.153385	RHO	1
GO:0021634	optic nerve formation	1/258	1/18670	0.013819	0.175755	0.153385	PAX2	1
GO:0021723	medullary reticular formation development	1/258	1/18670	0.013819	0.175755	0.153385	PHOX2B	1
GO:0033342	negative regulation of collagen binding	1/258	1/18670	0.013819	0.175755	0.153385	GTPBP4	1
GO:0035623	renal glucose absorption	1/258	1/18670	0.013819	0.175755	0.153385	HNF1A	1
GO:0038133	ERBB2-ERBB3 signaling pathway	1/258	1/18670	0.013819	0.175755	0.153385	MYOC	1
GO:0042668	auditory receptor cell fate determination	1/258	1/18670	0.013819	0.175755	0.153385	ATOH1	1
GO:0044333	Wnt signaling pathway involved in digestive tract morphogenesis	1/258	1/18670	0.013819	0.175755	0.153385	SFRP5	1
GO:0045380	positive regulation of interleukin-17 biosynthetic process	1/258	1/18670	0.013819	0.175755	0.153385	IL6	1
GO:0045609	positive regulation of inner ear auditory receptor cell differentiation	1/258	1/18670	0.013819	0.175755	0.153385	ATOH1	1
GO:0045633	positive regulation of mechanoreceptor differentiation	1/258	1/18670	0.013819	0.175755	0.153385	ATOH1	1
GO:0048561	establishment of animal organ orientation	1/258	1/18670	0.013819	0.175755	0.153385	IRX4	1
GO:0048892	lateral line nerve development	1/258	1/18670	0.013819	0.175755	0.153385	PHOX2B	1
GO:0048894	efferent axon development in a lateral line nerve	1/258	1/18670	0.013819	0.175755	0.153385	PHOX2B	1
GO:0060127	prolactin secreting cell differentiation	1/258	1/18670	0.013819	0.175755	0.153385	PITX2	1
GO:0060470	positive regulation of cytosolic calcium ion concentration involved in egg activation	1/258	1/18670	0.013819	0.175755	0.153385	PLCZ1	1
GO:0060695	negative regulation of cholesterol transporter activity	1/258	1/18670	0.013819	0.175755	0.153385	APOA2	1
GO:0060887	limb epidermis development	1/258	1/18670	0.013819	0.175755	0.153385	KDF1	1
GO:0061360	optic chiasma development	1/258	1/18670	0.013819	0.175755	0.153385	PAX2	1
GO:0061451	retrotrapezoid nucleus development	1/258	1/18670	0.013819	0.175755	0.153385	PHOX2B	1
GO:0061452	retrotrapezoid nucleus neuron differentiation	1/258	1/18670	0.013819	0.175755	0.153385	PHOX2B	1
GO:0071471	cellular response to non-ionic osmotic stress	1/258	1/18670	0.013819	0.175755	0.153385	PTGS2	1
GO:1903366	negative regulation of fear response	1/258	1/18670	0.013819	0.175755	0.153385	CCK	1
GO:1903494	response to dehydroepiandrosterone	1/258	1/18670	0.013819	0.175755	0.153385	CSN1S1	1
GO:1903496	response to 11-deoxycorticosterone	1/258	1/18670	0.013819	0.175755	0.153385	CSN1S1	1
GO:1905603	regulation of maintenance of permeability of blood-brain barrier	1/258	1/18670	0.013819	0.175755	0.153385	IL6	1
GO:2000056	regulation of Wnt signaling pathway involved in digestive tract morphogenesis	1/258	1/18670	0.013819	0.175755	0.153385	SFRP5	1
GO:2000057	negative regulation of Wnt signaling pathway involved in digestive tract morphogenesis	1/258	1/18670	0.013819	0.175755	0.153385	SFRP5	1
GO:2000595	regulation of optic nerve formation	1/258	1/18670	0.013819	0.175755	0.153385	PAX2	1
GO:2000597	positive regulation of optic nerve formation	1/258	1/18670	0.013819	0.175755	0.153385	PAX2	1
GO:2000982	positive regulation of inner ear receptor cell differentiation	1/258	1/18670	0.013819	0.175755	0.153385	ATOH1	1
GO:2000986	negative regulation of behavioral fear response	1/258	1/18670	0.013819	0.175755	0.153385	CCK	1
GO:0048747	muscle fiber development	4/258	67/18670	0.0138359	0.175755	0.153385	MYH11/P2RX2/SHOX2/WFIKKN2	4
GO:0001894	tissue homeostasis	8/258	227/18670	0.0138726	0.175755	0.153385	CLRN1/COL2A1/IL6/KRT1/LCN1/MUC2/RHO/SFTPA1	8
GO:0001662	behavioral fear response	3/258	37/18670	0.0143373	0.179465	0.156623	CCK/CRH/NEUROD2	3
GO:0006921	cellular component disassembly involved in execution phase of apoptosis	3/258	37/18670	0.0143373	0.179465	0.156623	CIDEA/DNASE1L3/IL6	3
GO:1900026	positive regulation of substrate adhesion-dependent cell spreading	3/258	37/18670	0.0143373	0.179465	0.156623	FGB/FGG/MYOC	3
GO:0035914	skeletal muscle cell differentiation	4/258	68/18670	0.0145452	0.179465	0.156623	DMRTA2/PAX7/PHOX2B/TBX1	4
GO:0050891	multicellular organismal water homeostasis	4/258	68/18670	0.0145452	0.179465	0.156623	KDF1/KRT1/KRT16/MET	4
GO:0035296	regulation of tube diameter	6/258	143/18670	0.0146013	0.179465	0.156623	CRP/FGB/FGG/KNG1/NTS/PTGS2	6
GO:0050880	regulation of blood vessel size	6/258	143/18670	0.0146013	0.179465	0.156623	CRP/FGB/FGG/KNG1/NTS/PTGS2	6
GO:0097746	regulation of blood vessel diameter	6/258	143/18670	0.0146013	0.179465	0.156623	CRP/FGB/FGG/KNG1/NTS/PTGS2	6
GO:0001523	retinoid metabolic process	5/258	104/18670	0.0147329	0.179742	0.156864	APOA2/APOC3/CLPS/CYP26A1/RHO	5
GO:0007218	neuropeptide signaling pathway	5/258	104/18670	0.0147329	0.179742	0.156864	ECEL1/NPBWR2/NPS/PROKR2/SSTR3	5
GO:0055001	muscle cell development	7/258	186/18670	0.0150118	0.182449	0.159227	ACTC1/CSRP1/MYH11/P2RX2/SHOX2/TNNT2/WFIKKN2	7
GO:0035150	regulation of tube size	6/258	144/18670	0.0150656	0.182449	0.159227	CRP/FGB/FGG/KNG1/NTS/PTGS2	6
GO:0002209	behavioral defense response	3/258	38/18670	0.0154104	0.184504	0.16102	CCK/CRH/NEUROD2	3
GO:0032094	response to food	3/258	38/18670	0.0154104	0.184504	0.16102	CCK/CLPS/CLPSL1	3
GO:0034370	triglyceride-rich lipoprotein particle remodeling	2/258	14/18670	0.0155153	0.184504	0.16102	APOA2/APOC3	2
GO:0072498	embryonic skeletal joint development	2/258	14/18670	0.0155153	0.184504	0.16102	COL2A1/SHOX2	2
GO:1903624	regulation of DNA catabolic process	2/258	14/18670	0.0155153	0.184504	0.16102	CIDEA/IL6	2
GO:0097305	response to alcohol	8/258	233/18670	0.0159957	0.188602	0.164596	ACTC1/CA3/CRH/CSF3/CSN1S1/NEFL/NPAS4/SLC6A3	8
GO:0010517	regulation of phospholipase activity	4/258	70/18670	0.0160317	0.188602	0.164596	ANXA8L1/ANXA8/NTF3/SELE	4
GO:0072091	regulation of stem cell proliferation	4/258	70/18670	0.0160317	0.188602	0.164596	DMRTA2/KDF1/SIX3/THPO	4
GO:0030049	muscle filament sliding	3/258	39/18670	0.0165276	0.192374	0.167888	ACTC1/DES/TNNT2	3
GO:0033275	actin-myosin filament sliding	3/258	39/18670	0.0165276	0.192374	0.167888	ACTC1/DES/TNNT2	3
GO:0045684	positive regulation of epidermis development	3/258	39/18670	0.0165276	0.192374	0.167888	ATOH1/KDF1/KRT17	3
GO:0050795	regulation of behavior	4/258	71/18670	0.0168094	0.194678	0.169899	CCK/CRH/DRD3/NPS	4
GO:0032496	response to lipopolysaccharide	10/258	330/18670	0.0168437	0.194678	0.169899	RIPK2/CSF3/CXCL1/CXCL6/GJB6/IL6/LCN2/PTGS2/S100A7/SELE	10
GO:0051592	response to calcium ion	6/258	148/18670	0.0170256	0.196092	0.171133	ALOX15/CPNE7/FGB/FGG/NEUROD2/TNNT2	6
GO:0019835	cytolysis	3/258	40/18670	0.017689	0.198987	0.17366	CFHR5/LYZL6/PAX2	3
GO:0042596	fear response	3/258	40/18670	0.017689	0.198987	0.17366	CCK/CRH/NEUROD2	3
GO:0001676	long-chain fatty acid metabolic process	5/258	109/18670	0.0177162	0.198987	0.17366	ADTRP/ALOX15/FADS1/GSTA1/PTGS2	5
GO:0021761	limbic system development	5/258	109/18670	0.0177162	0.198987	0.17366	CRH/MAS1/NEFL/NEUROD6/TBR1	5
GO:0018298	protein-chromophore linkage	2/258	15/18670	0.0177409	0.198987	0.17366	AMBP/RHO	2
GO:0060134	prepulse inhibition	2/258	15/18670	0.0177409	0.198987	0.17366	DRD3/SLC6A3	2
GO:0090494	dopamine uptake	2/258	15/18670	0.0177409	0.198987	0.17366	DRD3/SLC6A3	2
GO:0015849	organic acid transport	10/258	333/18670	0.0178206	0.198987	0.17366	ABCB11/AGXT/CCK/DRD3/LCN1/PLA2G4F/SLC22A9/SLC6A18/SLC6A7/SLCO1B1	10
GO:0046942	carboxylic acid transport	10/258	333/18670	0.0178206	0.198987	0.17366	ABCB11/AGXT/CCK/DRD3/LCN1/PLA2G4F/SLC22A9/SLC6A18/SLC6A7/SLCO1B1	10
GO:0048732	gland development	12/258	434/18670	0.0179906	0.200206	0.174724	CRH/FGF7/HNF4A/HNF1A/HOXB3/MET/PITX2/SERPINA5/SERPINB5/SIX3/SLC6A3/TBX1	12
GO:0033559	unsaturated fatty acid metabolic process	5/258	110/18670	0.0183573	0.20309	0.177241	ALOX15/FADS1/GSTA1/PLA2G4F/PTGS2	5
GO:0030239	myofibril assembly	4/258	73/18670	0.0184347	0.20309	0.177241	ACTC1/CSRP1/MYH11/TNNT2	4
GO:1903524	positive regulation of blood circulation	4/258	73/18670	0.0184347	0.20309	0.177241	FGB/FGG/OR51E2/PTGS2	4
GO:0006308	DNA catabolic process	3/258	41/18670	0.0188949	0.207466	0.18106	CIDEA/DNASE1L3/IL6	3
GO:0072676	lymphocyte migration	5/258	111/18670	0.0190135	0.208075	0.181591	ADTRP/CCL18/CCL24/GPR15/S100A7	5
GO:0002793	positive regulation of peptide secretion	9/258	288/18670	0.0190806	0.208117	0.181628	RIPK2/CRH/FGB/FGG/IL26/IL6/OR51E2/POSTN/VSNL1	9
GO:0001895	retina homeostasis	4/258	74/18670	0.0192826	0.208937	0.182344	CLRN1/KRT1/LCN1/RHO	4
GO:0030104	water homeostasis	4/258	74/18670	0.0192826	0.208937	0.182344	KDF1/KRT1/KRT16/MET	4
GO:0002065	columnar/cuboidal epithelial cell differentiation	5/258	112/18670	0.019685	0.211428	0.184517	ATOH1/CLRN1/HNF4A/MCOLN3/ROS1	5
GO:0009749	response to glucose	7/258	197/18670	0.019921	0.211428	0.184517	APOA2/CRH/GJB6/HNF4A/MAFA/PAX2/VSNL1	7
GO:0014866	skeletal myofibril assembly	2/258	16/18670	0.0200926	0.211428	0.184517	ACTC1/MYH11	2
GO:0019372	lipoxygenase pathway	2/258	16/18670	0.0200926	0.211428	0.184517	ALOX15/PTGS2	2
GO:0032225	regulation of synaptic transmission, dopaminergic	2/258	16/18670	0.0200926	0.211428	0.184517	DRD3/PTGS2	2
GO:0043252	sodium-independent organic anion transport	2/258	16/18670	0.0200926	0.211428	0.184517	SLC22A9/SLCO1B1	2
GO:0051238	sequestering of metal ion	2/258	16/18670	0.0200926	0.211428	0.184517	LCN2/S100A7	2
GO:0090493	catecholamine uptake	2/258	16/18670	0.0200926	0.211428	0.184517	DRD3/SLC6A3	2
GO:0021983	pituitary gland development	3/258	42/18670	0.0201453	0.211428	0.184517	PITX2/SIX3/SLC6A3	3
GO:0021536	diencephalon development	4/258	75/18670	0.0201543	0.211428	0.184517	CRH/PITX2/SIX3/SLC6A3	4
GO:0010770	positive regulation of cell morphogenesis involved in differentiation	6/258	154/18670	0.0202841	0.212113	0.185115	FGB/FGG/LPAR3/MYOC/NEFL/SHOX2	6
GO:0031032	actomyosin structure organization	7/258	199/18670	0.0209211	0.218082	0.190325	ACTC1/CSRP1/MET/MIR149/MYH11/MYOC/TNNT2	7
GO:0006690	icosanoid metabolic process	5/258	114/18670	0.0210741	0.218985	0.191112	ALOX15/FADS1/GSTA1/PLA2G4F/PTGS2	5
GO:0002237	response to molecule of bacterial origin	10/258	343/18670	0.0213801	0.2207	0.192609	RIPK2/CSF3/CXCL1/CXCL6/GJB6/IL6/LCN2/PTGS2/S100A7/SELE	10
GO:0006692	prostanoid metabolic process	3/258	43/18670	0.0214402	0.2207	0.192609	GSTA1/PLA2G4F/PTGS2	3
GO:0006693	prostaglandin metabolic process	3/258	43/18670	0.0214402	0.2207	0.192609	GSTA1/PLA2G4F/PTGS2	3
GO:0050900	leukocyte migration	13/258	499/18670	0.0218664	0.221058	0.192921	ADTRP/CCL18/CCL24/CXCL1/CXCL6/GPR15/IGHM/IL6/PRTN3/S100A7/SELE/TNFSF18/UMOD	13
GO:1905952	regulation of lipid localization	6/258	157/18670	0.0220622	0.221058	0.192921	APOA2/APOC3/CIDEA/CRH/CRP/IL6	6
GO:0007342	fusion of sperm to egg plasma membrane involved in single fertilization	2/258	17/18670	0.0225667	0.221058	0.192921	LYZL6/SERPINA5	2
GO:0034384	high-density lipoprotein particle clearance	2/258	17/18670	0.0225667	0.221058	0.192921	APOA2/APOC3	2
GO:0042268	regulation of cytolysis	2/258	17/18670	0.0225667	0.221058	0.192921	CFHR5/PAX2	2
GO:0042753	positive regulation of circadian rhythm	2/258	17/18670	0.0225667	0.221058	0.192921	CRH/NPS	2
GO:0043651	linoleic acid metabolic process	2/258	17/18670	0.0225667	0.221058	0.192921	FADS1/GSTA1	2
GO:0045187	regulation of circadian sleep/wake cycle, sleep	2/258	17/18670	0.0225667	0.221058	0.192921	CRH/DRD3	2
GO:0048521	negative regulation of behavior	2/258	17/18670	0.0225667	0.221058	0.192921	CCK/CRH	2
GO:0010463	mesenchymal cell proliferation	3/258	44/18670	0.0227797	0.221058	0.192921	FGF7/SHOX2/TBX1	3
GO:0031016	pancreas development	4/258	78/18670	0.0229135	0.221058	0.192921	HNF4A/HNF1A/IL6/MET	4
GO:0030072	peptide hormone secretion	8/258	250/18670	0.0232764	0.221058	0.192921	CRH/FGB/FGG/HNF4A/HNF1A/IL6/MAFA/VSNL1	8
GO:0021537	telencephalon development	8/258	251/18670	0.0237668	0.221058	0.192921	ATOH1/DMRTA2/MAS1/NEFL/NEUROD6/NRGN/SIX3/TBR1	8
GO:0007519	skeletal muscle tissue development	6/258	160/18670	0.0239426	0.221058	0.192921	DMRTA2/P2RX2/PAX7/PHOX2B/SHOX2/TBX1	6
GO:0006911	phagocytosis, engulfment	5/258	118/18670	0.0240407	0.221058	0.192921	ALOX15/IGHG4/IGHM/IGHV4-31/MARCO	5
GO:0048483	autonomic nervous system development	3/258	45/18670	0.0241637	0.221058	0.192921	GFRA3/PHOX2B/TBX1	3
GO:0051932	synaptic transmission, GABAergic	3/258	45/18670	0.0241637	0.221058	0.192921	GABRA6/NPAS4/NPS	3
GO:0022617	extracellular matrix disassembly	4/258	80/18670	0.0248744	0.221058	0.192921	IL6/KLK2/KLKB1/KLK4	4
GO:0007250	activation of NF-kappaB-inducing kinase activity	2/258	18/18670	0.0251594	0.221058	0.192921	CHI3L1/MAS1	2
GO:0007597	blood coagulation, intrinsic pathway	2/258	18/18670	0.0251594	0.221058	0.192921	KLKB1/KNG1	2
GO:0034375	high-density lipoprotein particle remodeling	2/258	18/18670	0.0251594	0.221058	0.192921	APOA2/APOC3	2
GO:0015718	monocarboxylic acid transport	6/258	162/18670	0.0252542	0.221058	0.192921	ABCB11/DRD3/LCN1/PLA2G4F/SLC22A9/SLCO1B1	6
GO:0007157	heterophilic cell-cell adhesion via plasma membrane cell adhesion molecules	3/258	46/18670	0.0255923	0.221058	0.192921	LGALS7B/SELE/UMOD	3
GO:0010883	regulation of lipid storage	3/258	46/18670	0.0255923	0.221058	0.192921	CIDEA/CRP/IL6	3
GO:0071354	cellular response to interleukin-6	3/258	46/18670	0.0255923	0.221058	0.192921	FGG/IL6/MIR149	3
GO:0034109	homotypic cell-cell adhesion	4/258	81/18670	0.0258917	0.221058	0.192921	CSRP1/DSG2/FGB/FGG	4
GO:0050730	regulation of peptidyl-tyrosine phosphorylation	8/258	256/18670	0.0263279	0.221058	0.192921	RIPK2/CCK/CSF3/FGF7/IL31RA/IL6/NTF3/TNFSF18	8
GO:0090596	sensory organ morphogenesis	8/258	256/18670	0.0263279	0.221058	0.192921	ATOH1/CLRN1/COL2A1/GJB6/PAX2/PITX2/SIX3/TBX1	8
GO:0006633	fatty acid biosynthetic process	6/258	164/18670	0.0266129	0.221058	0.192921	ALOX15/APOC3/FADS1/FADS6/PLA2G4F/PTGS2	6
GO:0032642	regulation of chemokine production	4/258	82/18670	0.0269337	0.221058	0.192921	RIPK2/CXCL6/IL6/POSTN	4
GO:0060537	muscle tissue development	11/258	408/18670	0.0269694	0.221058	0.192921	ACTC1/CSRP1/DMRTA2/DSG2/MYH11/P2RX2/PAX7/PHOX2B/SHOX2/TBX1/TNNT2	11
GO:0008206	bile acid metabolic process	3/258	47/18670	0.0270654	0.221058	0.192921	ABCB11/AKR1D1/SULT2A1	3
GO:0002384	hepatic immune response	1/258	2/18670	0.0274477	0.221058	0.192921	IL6	1
GO:0002542	Factor XII activation	1/258	2/18670	0.0274477	0.221058	0.192921	KLKB1	1
GO:0003165	Purkinje myocyte development	1/258	2/18670	0.0274477	0.221058	0.192921	DSG2	1
GO:0003404	optic vesicle morphogenesis	1/258	2/18670	0.0274477	0.221058	0.192921	SIX3	1
GO:0015912	short-chain fatty acid transport	1/258	2/18670	0.0274477	0.221058	0.192921	SLC22A9	1
GO:0015913	short-chain fatty acid import	1/258	2/18670	0.0274477	0.221058	0.192921	SLC22A9	1
GO:0019265	glycine biosynthetic process, by transamination of glyoxylate	1/258	2/18670	0.0274477	0.221058	0.192921	AGXT	1
GO:0021550	medulla oblongata development	1/258	2/18670	0.0274477	0.221058	0.192921	PHOX2B	1
GO:0021633	optic nerve structural organization	1/258	2/18670	0.0274477	0.221058	0.192921	PAX2	1
GO:0021644	vagus nerve morphogenesis	1/258	2/18670	0.0274477	0.221058	0.192921	TBX1	1
GO:0032416	negative regulation of sodium:proton antiporter activity	1/258	2/18670	0.0274477	0.221058	0.192921	DRD3	1
GO:0033341	regulation of collagen binding	1/258	2/18670	0.0274477	0.221058	0.192921	GTPBP4	1
GO:0035545	determination of left/right asymmetry in nervous system	1/258	2/18670	0.0274477	0.221058	0.192921	DNAH11	1
GO:0035566	regulation of metanephros size	1/258	2/18670	0.0274477	0.221058	0.192921	PAX2	1
GO:0035981	tongue muscle cell differentiation	1/258	2/18670	0.0274477	0.221058	0.192921	TBX1	1
GO:0036345	platelet maturation	1/258	2/18670	0.0274477	0.221058	0.192921	FGG	1
GO:0038043	interleukin-5-mediated signaling pathway	1/258	2/18670	0.0274477	0.221058	0.192921	IL5RA	1
GO:0039003	pronephric field specification	1/258	2/18670	0.0274477	0.221058	0.192921	PAX2	1
GO:0039017	pattern specification involved in pronephros development	1/258	2/18670	0.0274477	0.221058	0.192921	PAX2	1
GO:0042322	negative regulation of circadian sleep/wake cycle, REM sleep	1/258	2/18670	0.0274477	0.221058	0.192921	CRH	1
GO:0042667	auditory receptor cell fate specification	1/258	2/18670	0.0274477	0.221058	0.192921	ATOH1	1
GO:0045105	intermediate filament polymerization or depolymerization	1/258	2/18670	0.0274477	0.221058	0.192921	NEFL	1
GO:0046724	oxalic acid secretion	1/258	2/18670	0.0274477	0.221058	0.192921	AGXT	1
GO:0048560	establishment of anatomical structure orientation	1/258	2/18670	0.0274477	0.221058	0.192921	IRX4	1
GO:0048925	lateral line system development	1/258	2/18670	0.0274477	0.221058	0.192921	PHOX2B	1
GO:0050883	musculoskeletal movement, spinal reflex action	1/258	2/18670	0.0274477	0.221058	0.192921	DRD3	1
GO:0055107	Golgi to secretory granule transport	1/258	2/18670	0.0274477	0.221058	0.192921	BICDL2	1
GO:0060694	regulation of cholesterol transporter activity	1/258	2/18670	0.0274477	0.221058	0.192921	APOA2	1
GO:0070950	regulation of neutrophil mediated killing of bacterium	1/258	2/18670	0.0274477	0.221058	0.192921	CXCL6	1
GO:0070951	regulation of neutrophil mediated killing of gram-negative bacterium	1/258	2/18670	0.0274477	0.221058	0.192921	CXCL6	1
GO:0071307	cellular response to vitamin K	1/258	2/18670	0.0274477	0.221058	0.192921	POSTN	1
GO:0072004	kidney field specification	1/258	2/18670	0.0274477	0.221058	0.192921	PAX2	1
GO:0072023	thick ascending limb development	1/258	2/18670	0.0274477	0.221058	0.192921	UMOD	1
GO:0072233	metanephric thick ascending limb development	1/258	2/18670	0.0274477	0.221058	0.192921	UMOD	1
GO:0072304	regulation of mesenchymal cell apoptotic process involved in metanephric nephron morphogenesis	1/258	2/18670	0.0274477	0.221058	0.192921	PAX2	1
GO:0072305	negative regulation of mesenchymal cell apoptotic process involved in metanephric nephron morphogenesis	1/258	2/18670	0.0274477	0.221058	0.192921	PAX2	1
GO:0072309	mesenchymal stem cell maintenance involved in metanephric nephron morphogenesis	1/258	2/18670	0.0274477	0.221058	0.192921	PAX2	1
GO:0090362	positive regulation of platelet-derived growth factor production	1/258	2/18670	0.0274477	0.221058	0.192921	PTGS2	1
GO:0097402	neuroblast migration	1/258	2/18670	0.0274477	0.221058	0.192921	SIX3	1
GO:0106005	RNA 5'-cap (guanine-N7)-methylation	1/258	2/18670	0.0274477	0.221058	0.192921	RNMT	1
GO:1900135	positive regulation of renin secretion into blood stream	1/258	2/18670	0.0274477	0.221058	0.192921	OR51E2	1
GO:1900204	apoptotic process involved in metanephric collecting duct development	1/258	2/18670	0.0274477	0.221058	0.192921	PAX2	1
GO:1900205	apoptotic process involved in metanephric nephron tubule development	1/258	2/18670	0.0274477	0.221058	0.192921	PAX2	1
GO:1900214	regulation of apoptotic process involved in metanephric collecting duct development	1/258	2/18670	0.0274477	0.221058	0.192921	PAX2	1
GO:1900215	negative regulation of apoptotic process involved in metanephric collecting duct development	1/258	2/18670	0.0274477	0.221058	0.192921	PAX2	1
GO:1900217	regulation of apoptotic process involved in metanephric nephron tubule development	1/258	2/18670	0.0274477	0.221058	0.192921	PAX2	1
GO:1900218	negative regulation of apoptotic process involved in metanephric nephron tubule development	1/258	2/18670	0.0274477	0.221058	0.192921	PAX2	1
GO:1901147	mesenchymal cell apoptotic process involved in metanephric nephron morphogenesis	1/258	2/18670	0.0274477	0.221058	0.192921	PAX2	1
GO:1902913	positive regulation of neuroepithelial cell differentiation	1/258	2/18670	0.0274477	0.221058	0.192921	ATOH1	1
GO:1903937	response to acrylamide	1/258	2/18670	0.0274477	0.221058	0.192921	NEFL	1
GO:2000592	regulation of metanephric DCT cell differentiation	1/258	2/18670	0.0274477	0.221058	0.192921	PAX2	1
GO:2000594	positive regulation of metanephric DCT cell differentiation	1/258	2/18670	0.0274477	0.221058	0.192921	PAX2	1
GO:2000854	positive regulation of corticosterone secretion	1/258	2/18670	0.0274477	0.221058	0.192921	CRH	1
GO:2001035	regulation of tongue muscle cell differentiation	1/258	2/18670	0.0274477	0.221058	0.192921	TBX1	1
GO:2001037	positive regulation of tongue muscle cell differentiation	1/258	2/18670	0.0274477	0.221058	0.192921	TBX1	1
GO:2001302	lipoxin A4 metabolic process	1/258	2/18670	0.0274477	0.221058	0.192921	ALOX15	1
GO:2001303	lipoxin A4 biosynthetic process	1/258	2/18670	0.0274477	0.221058	0.192921	ALOX15	1
GO:1903531	negative regulation of secretion by cell	7/258	211/18670	0.0276628	0.22119	0.193036	ADTRP/APOA2/CIDEA/CRH/DRD3/MIR149/VSNL1	7
GO:0010888	negative regulation of lipid storage	2/258	19/18670	0.0278669	0.22119	0.193036	CRP/IL6	2
GO:0044241	lipid digestion	2/258	19/18670	0.0278669	0.22119	0.193036	APOA2/CLPS	2
GO:0048486	parasympathetic nervous system development	2/258	19/18670	0.0278669	0.22119	0.193036	PHOX2B/TBX1	2
GO:0051546	keratinocyte migration	2/258	19/18670	0.0278669	0.22119	0.193036	FGF7/KRT16	2
GO:2000251	positive regulation of actin cytoskeleton reorganization	2/258	19/18670	0.0278669	0.22119	0.193036	CSF3/NTF3	2
GO:0097696	STAT cascade	6/258	166/18670	0.0280193	0.221865	0.193626	IL26/IL31RA/IL6/MIR149/TNFSF18/THPO	6
GO:0071621	granulocyte chemotaxis	5/258	123/18670	0.0281109	0.222056	0.193792	CCL18/CCL24/CXCL1/CXCL6/S100A7	5
GO:0008542	visual learning	3/258	48/18670	0.0285829	0.225244	0.196575	CCK/DRD3/NPS	3
GO:0046717	acid secretion	5/258	124/18670	0.0289741	0.227782	0.19879	ABCB11/AGXT/CCK/DRD3/PLA2G4F	5
GO:0097756	negative regulation of blood vessel diameter	4/258	84/18670	0.0290921	0.228165	0.199124	CRP/FGB/FGG/PTGS2	4
GO:0045471	response to ethanol	5/258	125/18670	0.0298539	0.233584	0.203853	ACTC1/CA3/CRH/CSF3/SLC6A3	5
GO:0034612	response to tumor necrosis factor	9/258	312/18670	0.0299348	0.233662	0.203921	CCL18/CCL24/CD70/CHI3L1/LCN2/POSTN/PTGS2/SELE/TNFSF18	9
GO:0018108	peptidyl-tyrosine phosphorylation	10/258	363/18670	0.0300096	0.233692	0.203947	RIPK2/CCK/CSF3/FGF7/IL31RA/IL6/MET/NTF3/ROS1/TNFSF18	10
GO:0045682	regulation of epidermis development	4/258	85/18670	0.0302087	0.23422	0.204408	ATOH1/KDF1/KRT17/KRT84	4
GO:0060538	skeletal muscle organ development	6/258	169/18670	0.0302196	0.23422	0.204408	DMRTA2/P2RX2/PAX7/PHOX2B/SHOX2/TBX1	6
GO:0043691	reverse cholesterol transport	2/258	20/18670	0.0306856	0.235614	0.205625	APOA2/APOC3	2
GO:0050802	circadian sleep/wake cycle, sleep	2/258	20/18670	0.0306856	0.235614	0.205625	CRH/DRD3	2
GO:0071636	positive regulation of transforming growth factor beta production	2/258	20/18670	0.0306856	0.235614	0.205625	MIR149/PTGS2	2
GO:0072234	metanephric nephron tubule development	2/258	20/18670	0.0306856	0.235614	0.205625	PAX2/UMOD	2
GO:0032102	negative regulation of response to external stimulus	10/258	365/18670	0.0309909	0.237404	0.207187	ADTRP/CCK/DRD3/FGB/FGG/KLKB1/KNG1/KRT1/MIR149/SLC6A3	10
GO:0001942	hair follicle development	4/258	86/18670	0.0313503	0.239601	0.209104	ALX4/FGF7/KRT17/KRT84	4
GO:0018212	peptidyl-tyrosine modification	10/258	366/18670	0.0314899	0.240111	0.209549	RIPK2/CCK/CSF3/FGF7/IL31RA/IL6/MET/NTF3/ROS1/TNFSF18	10
GO:0099024	plasma membrane invagination	5/258	127/18670	0.0316637	0.240878	0.210219	ALOX15/IGHG4/IGHM/IGHV4-31/MARCO	5
GO:0030317	flagellated sperm motility	4/258	87/18670	0.032517	0.245768	0.214486	DNAH11/SEMG1/SEMG2/TEX101	4
GO:0097722	sperm motility	4/258	87/18670	0.032517	0.245768	0.214486	DNAH11/SEMG1/SEMG2/TEX101	4
GO:0021543	pallium development	6/258	172/18670	0.0325303	0.245768	0.214486	ATOH1/DMRTA2/MAS1/NEFL/NEUROD6/TBR1	6
GO:0006909	phagocytosis	10/258	369/18670	0.0330211	0.248905	0.217224	ALOX15/APOA2/CRP/IGHG4/IGHM/IGHV4-31/MARCO/MET/PRTN3/SFTPA1	10
GO:0045599	negative regulation of fat cell differentiation	3/258	51/18670	0.0334006	0.250084	0.218253	C1QL4/IL6/CCN4	3
GO:0045026	plasma membrane fusion	2/258	21/18670	0.033612	0.250084	0.218253	LYZL6/SERPINA5	2
GO:0048485	sympathetic nervous system development	2/258	21/18670	0.033612	0.250084	0.218253	GFRA3/PHOX2B	2
GO:0051900	regulation of mitochondrial depolarization	2/258	21/18670	0.033612	0.250084	0.218253	CCK/MYOC	2
GO:0071498	cellular response to fluid shear stress	2/258	21/18670	0.033612	0.250084	0.218253	PTGS2/TFPI2	2
GO:0022404	molting cycle process	4/258	88/18670	0.0337089	0.250084	0.218253	ALX4/FGF7/KRT17/KRT84	4
GO:0022405	hair cycle process	4/258	88/18670	0.0337089	0.250084	0.218253	ALX4/FGF7/KRT17/KRT84	4
GO:0045165	cell fate commitment	8/258	270/18670	0.0345087	0.255442	0.222929	ATOH1/DBX1/DMRTA2/IL6/PAX2/PAX7/TBR1/TBX1	8
GO:0032602	chemokine production	4/258	89/18670	0.034926	0.256321	0.223696	RIPK2/CXCL6/IL6/POSTN	4
GO:0046427	positive regulation of JAK-STAT cascade	4/258	89/18670	0.034926	0.256321	0.223696	IL26/IL31RA/IL6/TNFSF18	4
GO:0060021	roof of mouth development	4/258	89/18670	0.034926	0.256321	0.223696	ALX4/COL2A1/TBX1/WFIKKN2	4
GO:0006956	complement activation	6/258	175/18670	0.034953	0.256321	0.223696	CFHR5/CRP/IGHG4/IGHM/IGHV4-31/KRT1	6
GO:0035176	social behavior	3/258	52/18670	0.0350944	0.256321	0.223696	DRD3/NPAS4/TBX1	3
GO:0051703	intraspecies interaction between organisms	3/258	52/18670	0.0350944	0.256321	0.223696	DRD3/NPAS4/TBX1	3
GO:0009914	hormone transport	9/258	322/18670	0.0355301	0.256548	0.223894	CRH/FGB/FGG/HNF4A/HNF1A/IL6/MAFA/SLC22A9/VSNL1	9
GO:0071674	mononuclear cell migration	4/258	90/18670	0.0361683	0.256548	0.223894	CCL18/CCL24/IL6/S100A7	4
GO:0048568	embryonic organ development	11/258	428/18670	0.0362821	0.256548	0.223894	ALX4/ATOH1/CLRN1/COL2A1/GJB6/HOXB3/PAX2/SHOX2/SIX3/TBX1/TPO	11
GO:0051047	positive regulation of secretion	11/258	428/18670	0.0362821	0.256548	0.223894	RIPK2/CCK/CRH/DRD3/FGB/FGG/IL26/IL6/OR51E2/POSTN/VSNL1	11
GO:0072329	monocarboxylic acid catabolic process	5/258	132/18670	0.036484	0.256548	0.223894	ADTRP/AGXT/AKR1D1/CYP26A1/SULT2A1	5
GO:0030878	thyroid gland development	2/258	22/18670	0.0366424	0.256548	0.223894	HOXB3/TBX1	2
GO:0035024	negative regulation of Rho protein signal transduction	2/258	22/18670	0.0366424	0.256548	0.223894	MET/MYOC	2
GO:0007632	visual behavior	3/258	53/18670	0.0368318	0.256548	0.223894	CCK/DRD3/NPS	3
GO:0060563	neuroepithelial cell differentiation	3/258	53/18670	0.0368318	0.256548	0.223894	ATOH1/CLRN1/MCOLN3	3
GO:0048736	appendage development	6/258	179/18670	0.0383601	0.256548	0.223894	ALX4/COL2A1/KDF1/KRT84/PITX2/SHOX2	6
GO:0060173	limb development	6/258	179/18670	0.0383601	0.256548	0.223894	ALX4/COL2A1/KDF1/KRT84/PITX2/SHOX2	6
GO:0050994	regulation of lipid catabolic process	3/258	54/18670	0.0386126	0.256548	0.223894	APOA2/APOC3/CIDEA	3
GO:1904894	positive regulation of STAT cascade	4/258	92/18670	0.0387288	0.256548	0.223894	IL26/IL31RA/IL6/TNFSF18	4
GO:0010324	membrane invagination	5/258	135/18670	0.0395814	0.256548	0.223894	ALOX15/IGHG4/IGHM/IGHV4-31/MARCO	5
GO:0043950	positive regulation of cAMP-mediated signaling	2/258	23/18670	0.0397736	0.256548	0.223894	CRH/OR51E2	2
GO:0051882	mitochondrial depolarization	2/258	23/18670	0.0397736	0.256548	0.223894	CCK/MYOC	2
GO:0072170	metanephric tubule development	2/258	23/18670	0.0397736	0.256548	0.223894	PAX2/UMOD	2
GO:0072243	metanephric nephron epithelium development	2/258	23/18670	0.0397736	0.256548	0.223894	PAX2/UMOD	2
GO:0002090	regulation of receptor internalization	3/258	55/18670	0.0404365	0.256548	0.223894	DRD3/NTF3/SELE	3
GO:0042220	response to cocaine	3/258	55/18670	0.0404365	0.256548	0.223894	CRH/DRD3/SLC6A3	3
GO:0002254	kinin cascade	1/258	3/18670	0.0408888	0.256548	0.223894	KLKB1	1
GO:0002353	plasma kallikrein-kinin cascade	1/258	3/18670	0.0408888	0.256548	0.223894	KLKB1	1
GO:0002541	activation of plasma proteins involved in acute inflammatory response	1/258	3/18670	0.0408888	0.256548	0.223894	KLKB1	1
GO:0003358	noradrenergic neuron development	1/258	3/18670	0.0408888	0.256548	0.223894	PHOX2B	1
GO:0008292	acetylcholine biosynthetic process	1/258	3/18670	0.0408888	0.256548	0.223894	CHAT	1
GO:0009436	glyoxylate catabolic process	1/258	3/18670	0.0408888	0.256548	0.223894	AGXT	1
GO:0009624	response to nematode	1/258	3/18670	0.0408888	0.256548	0.223894	ITLN1	1
GO:0009946	proximal/distal axis specification	1/258	3/18670	0.0408888	0.256548	0.223894	SIX3	1
GO:0010481	epidermal cell division	1/258	3/18670	0.0408888	0.256548	0.223894	KDF1	1
GO:0010482	regulation of epidermal cell division	1/258	3/18670	0.0408888	0.256548	0.223894	KDF1	1
GO:0015688	iron chelate transport	1/258	3/18670	0.0408888	0.256548	0.223894	LCN2	1
GO:0015891	siderophore transport	1/258	3/18670	0.0408888	0.256548	0.223894	LCN2	1
GO:0021564	vagus nerve development	1/258	3/18670	0.0408888	0.256548	0.223894	TBX1	1
GO:0021934	hindbrain tangential cell migration	1/258	3/18670	0.0408888	0.256548	0.223894	PHOX2B	1
GO:0032227	negative regulation of synaptic transmission, dopaminergic	1/258	3/18670	0.0408888	0.256548	0.223894	PTGS2	1
GO:0032916	positive regulation of transforming growth factor beta3 production	1/258	3/18670	0.0408888	0.256548	0.223894	MIR149	1
GO:0033091	positive regulation of immature T cell proliferation	1/258	3/18670	0.0408888	0.256548	0.223894	RIPK2	1
GO:0033685	negative regulation of luteinizing hormone secretion	1/258	3/18670	0.0408888	0.256548	0.223894	CRH	1
GO:0035993	deltoid tuberosity development	1/258	3/18670	0.0408888	0.256548	0.223894	PITX2	1
GO:0038129	ERBB3 signaling pathway	1/258	3/18670	0.0408888	0.256548	0.223894	MYOC	1
GO:0042235	interleukin-17 biosynthetic process	1/258	3/18670	0.0408888	0.256548	0.223894	IL6	1
GO:0045079	negative regulation of chemokine biosynthetic process	1/258	3/18670	0.0408888	0.256548	0.223894	IL6	1
GO:0045378	regulation of interleukin-17 biosynthetic process	1/258	3/18670	0.0408888	0.256548	0.223894	IL6	1
GO:0046968	peptide antigen transport	1/258	3/18670	0.0408888	0.256548	0.223894	CLEC4M	1
GO:0050955	thermoception	1/258	3/18670	0.0408888	0.256548	0.223894	TRPA1	1
GO:0050968	detection of chemical stimulus involved in sensory perception of pain	1/258	3/18670	0.0408888	0.256548	0.223894	TRPA1	1
GO:0060168	positive regulation of adenosine receptor signaling pathway	1/258	3/18670	0.0408888	0.256548	0.223894	ACPP	1
GO:0061033	secretion by lung epithelial cell involved in lung growth	1/258	3/18670	0.0408888	0.256548	0.223894	FGF7	1
GO:0061107	seminal vesicle development	1/258	3/18670	0.0408888	0.256548	0.223894	SERPINA5	1
GO:0070494	regulation of thrombin-activated receptor signaling pathway	1/258	3/18670	0.0408888	0.256548	0.223894	MET	1
GO:0070495	negative regulation of thrombin-activated receptor signaling pathway	1/258	3/18670	0.0408888	0.256548	0.223894	MET	1
GO:0070949	regulation of neutrophil mediated killing of symbiont cell	1/258	3/18670	0.0408888	0.256548	0.223894	CXCL6	1
GO:0071314	cellular response to cocaine	1/258	3/18670	0.0408888	0.256548	0.223894	CRH	1
GO:0071386	cellular response to corticosterone stimulus	1/258	3/18670	0.0408888	0.256548	0.223894	NPAS4	1
GO:0072003	kidney rudiment formation	1/258	3/18670	0.0408888	0.256548	0.223894	PAX2	1
GO:0072069	DCT cell differentiation	1/258	3/18670	0.0408888	0.256548	0.223894	PAX2	1
GO:0072240	metanephric DCT cell differentiation	1/258	3/18670	0.0408888	0.256548	0.223894	PAX2	1
GO:0090360	platelet-derived growth factor production	1/258	3/18670	0.0408888	0.256548	0.223894	PTGS2	1
GO:0090361	regulation of platelet-derived growth factor production	1/258	3/18670	0.0408888	0.256548	0.223894	PTGS2	1
GO:0097325	melanocyte proliferation	1/258	3/18670	0.0408888	0.256548	0.223894	OR51E2	1
GO:0097724	sperm flagellum movement	1/258	3/18670	0.0408888	0.256548	0.223894	DNAH11	1
GO:0099185	postsynaptic intermediate filament cytoskeleton organization	1/258	3/18670	0.0408888	0.256548	0.223894	NEFL	1
GO:1900200	mesenchymal cell apoptotic process involved in metanephros development	1/258	3/18670	0.0408888	0.256548	0.223894	PAX2	1
GO:1900211	regulation of mesenchymal cell apoptotic process involved in metanephros development	1/258	3/18670	0.0408888	0.256548	0.223894	PAX2	1
GO:1900212	negative regulation of mesenchymal cell apoptotic process involved in metanephros development	1/258	3/18670	0.0408888	0.256548	0.223894	PAX2	1
GO:1900620	acetate ester biosynthetic process	1/258	3/18670	0.0408888	0.256548	0.223894	CHAT	1
GO:1901074	regulation of engulfment of apoptotic cell	1/258	3/18670	0.0408888	0.256548	0.223894	ALOX15	1
GO:1902811	positive regulation of skeletal muscle fiber differentiation	1/258	3/18670	0.0408888	0.256548	0.223894	TBX1	1
GO:1903999	negative regulation of eating behavior	1/258	3/18670	0.0408888	0.256548	0.223894	CCK	1
GO:1904158	axonemal central apparatus assembly	1/258	3/18670	0.0408888	0.256548	0.223894	SPAG17	1
GO:1905419	sperm flagellum movement involved in flagellated sperm motility	1/258	3/18670	0.0408888	0.256548	0.223894	DNAH11	1
GO:2000297	negative regulation of synapse maturation	1/258	3/18670	0.0408888	0.256548	0.223894	NEUROD2	1
GO:2000418	positive regulation of eosinophil migration	1/258	3/18670	0.0408888	0.256548	0.223894	CCL24	1
GO:2000676	positive regulation of type B pancreatic cell apoptotic process	1/258	3/18670	0.0408888	0.256548	0.223894	IL6	1
GO:0030100	regulation of endocytosis	8/258	281/18670	0.0420367	0.263249	0.229742	ALOX15/APOA2/APOC3/DRD3/NTF3/PRTN3/SELE/SFTPA1	8
GO:0060113	inner ear receptor cell differentiation	3/258	56/18670	0.0423034	0.263915	0.230324	ATOH1/CLRN1/MCOLN3	3
GO:0060688	regulation of morphogenesis of a branching structure	3/258	56/18670	0.0423034	0.263915	0.230324	FGF7/PAX2/SHOX2	3
GO:0002092	positive regulation of receptor internalization	2/258	24/18670	0.0430022	0.265261	0.231498	NTF3/SELE	2
GO:0003351	epithelial cilium movement	2/258	24/18670	0.0430022	0.265261	0.231498	DNAH11/SPAG17	2
GO:0021871	forebrain regionalization	2/258	24/18670	0.0430022	0.265261	0.231498	DMRTA2/SIX3	2
GO:0045606	positive regulation of epidermal cell differentiation	2/258	24/18670	0.0430022	0.265261	0.231498	ATOH1/KDF1	2
GO:0046697	decidualization	2/258	24/18670	0.0430022	0.265261	0.231498	PTGS2/TCF23	2
GO:0090103	cochlea morphogenesis	2/258	24/18670	0.0430022	0.265261	0.231498	PAX2/TBX1	2
GO:0090277	positive regulation of peptide hormone secretion	4/258	96/18670	0.0441534	0.271019	0.236524	CRH/FGB/FGG/VSNL1	4
GO:0001755	neural crest cell migration	3/258	57/18670	0.0442129	0.271019	0.236524	PHOX2B/PITX2/TBX1	3
GO:0002066	columnar/cuboidal epithelial cell development	3/258	57/18670	0.0442129	0.271019	0.236524	CLRN1/HNF4A/ROS1	3
GO:0021700	developmental maturation	8/258	284/18670	0.0442649	0.271019	0.236524	FGG/MYOC/NEFL/NEUROD2/PAX2/SEMG1/SEMG2/SIX3	8
GO:0014706	striated muscle tissue development	10/258	390/18670	0.0452235	0.275493	0.240428	ACTC1/DMRTA2/DSG2/MYH11/P2RX2/PAX7/PHOX2B/SHOX2/TBX1/TNNT2	10
GO:0002446	neutrophil mediated immunity	12/258	499/18670	0.0452465	0.275493	0.240428	ACPP/CHI3L1/CXCL1/CXCL6/DNASE1L3/HSPA6/IL6/KRT1/LCN2/PRTN3/PTPRB/S100A7	12
GO:0031667	response to nutrient levels	12/258	499/18670	0.0452465	0.275493	0.240428	CCK/CLPS/CLPSL1/CYP26A1/DAPL1/FADS1/LCN2/P2RX2/PAX2/POSTN/PTGS2/SSTR3	12
GO:0015908	fatty acid transport	4/258	97/18670	0.0455729	0.276969	0.241716	DRD3/LCN1/PLA2G4F/SLC22A9	4
GO:0048167	regulation of synaptic plasticity	6/258	187/18670	0.0457922	0.277789	0.242432	CRH/NEUROD2/NPAS4/NRGN/PTGS2/SCGN	6
GO:0019229	regulation of vasoconstriction	3/258	58/18670	0.0461647	0.277949	0.242572	FGB/FGG/PTGS2	3
GO:0032722	positive regulation of chemokine production	3/258	58/18670	0.0461647	0.277949	0.242572	RIPK2/IL6/POSTN	3
GO:0071385	cellular response to glucocorticoid stimulus	3/258	58/18670	0.0461647	0.277949	0.242572	CRH/NPAS4/SSTR3	3
GO:0002053	positive regulation of mesenchymal cell proliferation	2/258	25/18670	0.0463249	0.277949	0.242572	SHOX2/TBX1	2
GO:0031069	hair follicle morphogenesis	2/258	25/18670	0.0463249	0.277949	0.242572	FGF7/KRT17	2
GO:0097186	amelogenesis	2/258	25/18670	0.0463249	0.277949	0.242572	KLK4/TBX1	2
GO:0050764	regulation of phagocytosis	4/258	98/18670	0.0470176	0.281592	0.245751	ALOX15/APOA2/PRTN3/SFTPA1	4
GO:0051048	negative regulation of secretion	7/258	238/18670	0.0478739	0.284455	0.248249	ADTRP/APOA2/CIDEA/CRH/DRD3/MIR149/VSNL1	7
GO:0070527	platelet aggregation	3/258	59/18670	0.0481585	0.284455	0.248249	CSRP1/FGB/FGG	3
GO:0070301	cellular response to hydrogen peroxide	4/258	99/18670	0.0484875	0.284455	0.248249	IL6/LCN2/MET/PAX2	4
GO:1901570	fatty acid derivative biosynthetic process	4/258	99/18670	0.0484875	0.284455	0.248249	ALOX15/FADS1/PLA2G4F/PTGS2	4
GO:0072330	monocarboxylic acid biosynthetic process	9/258	343/18670	0.049532	0.284455	0.248249	ABCB11/AGXT/AKR1D1/ALOX15/APOC3/FADS1/FADS6/PLA2G4F/PTGS2	9
GO:0000244	spliceosomal tri-snRNP complex assembly	2/258	26/18670	0.0497385	0.284455	0.248249	RNU4-1/RNU4-2	2
GO:0003081	regulation of systemic arterial blood pressure by renin-angiotensin	2/258	26/18670	0.0497385	0.284455	0.248249	DRD3/OR51E2	2
GO:0006817	phosphate ion transport	2/258	26/18670	0.0497385	0.284455	0.248249	ROS1/SLC34A2	2
GO:0022400	regulation of rhodopsin mediated signaling pathway	2/258	26/18670	0.0497385	0.284455	0.248249	GUCA1C/RHO	2
GO:0048596	embryonic camera-type eye morphogenesis	2/258	26/18670	0.0497385	0.284455	0.248249	PAX2/SIX3	2
GO:0060074	synapse maturation	2/258	26/18670	0.0497385	0.284455	0.248249	NEFL/NEUROD2	2
GO:0022600	digestive system process	4/258	100/18670	0.0499826	0.284455	0.248249	APOA2/CRH/DRD3/MUC2	4
GO:0034446	substrate adhesion-dependent cell spreading	4/258	100/18670	0.0499826	0.284455	0.248249	FGB/FGG/MYOC/POSTN	4
GO:0042593	glucose homeostasis	7/258	241/18670	0.0505784	0.284455	0.248249	CRH/GJB6/HNF4A/HNF1A/PAX2/VSNL1/CCN4	7
GO:1903532	positive regulation of secretion by cell	10/258	399/18670	0.0512841	0.284455	0.248249	RIPK2/CCK/CRH/FGB/FGG/IL26/IL6/OR51E2/POSTN/VSNL1	10
GO:0051146	striated muscle cell differentiation	8/258	293/18670	0.0514118	0.284455	0.248249	ACTC1/CSRP1/MYH11/P2RX2/SHOX2/TBX1/TNNT2/WFIKKN2	8
GO:0033500	carbohydrate homeostasis	7/258	242/18670	0.0515009	0.284455	0.248249	CRH/GJB6/HNF4A/HNF1A/PAX2/VSNL1/CCN4	7
GO:0050830	defense response to Gram-positive bacterium	4/258	101/18670	0.0515029	0.284455	0.248249	RIPK2/CRP/IL6/LYZL6	4
GO:0051224	negative regulation of protein transport	6/258	193/18670	0.0519161	0.284455	0.248249	ADTRP/APOA2/CIDEA/DRD3/MIR149/VSNL1	6
GO:0007015	actin filament organization	10/258	400/18670	0.0519894	0.284455	0.248249	ACTC1/ALOX15/CCL24/CLRN1/CSF3/ESPN/MET/MIR149/MYOC/XIRP1	10
GO:0042490	mechanoreceptor differentiation	3/258	61/18670	0.0522708	0.284455	0.248249	ATOH1/CLRN1/MCOLN3	3
GO:0045604	regulation of epidermal cell differentiation	3/258	61/18670	0.0522708	0.284455	0.248249	ATOH1/KDF1/KRT84	3
GO:0071384	cellular response to corticosteroid stimulus	3/258	61/18670	0.0522708	0.284455	0.248249	CRH/NPAS4/SSTR3	3
GO:0002224	toll-like receptor signaling pathway	5/258	146/18670	0.052276	0.284455	0.248249	BPIFB1/RIPK2/FGB/FGG/SFTPA1	5
GO:0042542	response to hydrogen peroxide	5/258	146/18670	0.052276	0.284455	0.248249	IL6/LCN2/MET/PAX2/TRPA1	5
GO:1904892	regulation of STAT cascade	5/258	146/18670	0.052276	0.284455	0.248249	IL26/IL31RA/IL6/MIR149/TNFSF18	5
GO:0001964	startle response	2/258	27/18670	0.0532399	0.284455	0.248249	DRD3/SLC6A3	2
GO:0015721	bile acid and bile salt transport	2/258	27/18670	0.0532399	0.284455	0.248249	ABCB11/SLCO1B1	2
GO:0048643	positive regulation of skeletal muscle tissue development	2/258	27/18670	0.0532399	0.284455	0.248249	SHOX2/TBX1	2
GO:0072207	metanephric epithelium development	2/258	27/18670	0.0532399	0.284455	0.248249	PAX2/UMOD	2
GO:0071236	cellular response to antibiotic	5/258	147/18670	0.053535	0.284455	0.248249	IL6/LCN2/MET/PAX2/PLA2G4F	5
GO:0002528	regulation of vascular permeability involved in acute inflammatory response	1/258	4/18670	0.0541448	0.284455	0.248249	C2CD4A	1
GO:0003332	negative regulation of extracellular matrix constituent secretion	1/258	4/18670	0.0541448	0.284455	0.248249	ADTRP	1
GO:0003406	retinal pigment epithelium development	1/258	4/18670	0.0541448	0.284455	0.248249	PAX2	1
GO:0006545	glycine biosynthetic process	1/258	4/18670	0.0541448	0.284455	0.248249	AGXT	1
GO:0006772	thiamine metabolic process	1/258	4/18670	0.0541448	0.284455	0.248249	ACPP	1
GO:0009093	cysteine catabolic process	1/258	4/18670	0.0541448	0.284455	0.248249	AGXT	1
GO:0010916	negative regulation of very-low-density lipoprotein particle clearance	1/258	4/18670	0.0541448	0.284455	0.248249	APOC3	1
GO:0014016	neuroblast differentiation	1/258	4/18670	0.0541448	0.284455	0.248249	SIX3	1
GO:0014734	skeletal muscle hypertrophy	1/258	4/18670	0.0541448	0.284455	0.248249	MYOC	1
GO:0015722	canalicular bile acid transport	1/258	4/18670	0.0541448	0.284455	0.248249	ABCB11	1
GO:0016103	diterpenoid catabolic process	1/258	4/18670	0.0541448	0.284455	0.248249	CYP26A1	1
GO:0019448	L-cysteine catabolic process	1/258	4/18670	0.0541448	0.284455	0.248249	AGXT	1
GO:0021615	glossopharyngeal nerve morphogenesis	1/258	4/18670	0.0541448	0.284455	0.248249	HOXB3	1
GO:0021764	amygdala development	1/258	4/18670	0.0541448	0.284455	0.248249	TBR1	1
GO:0021797	forebrain anterior/posterior pattern specification	1/258	4/18670	0.0541448	0.284455	0.248249	SIX3	1
GO:0032571	response to vitamin K	1/258	4/18670	0.0541448	0.284455	0.248249	POSTN	1
GO:0034653	retinoic acid catabolic process	1/258	4/18670	0.0541448	0.284455	0.248249	CYP26A1	1
GO:0035564	regulation of kidney size	1/258	4/18670	0.0541448	0.284455	0.248249	PAX2	1
GO:0035799	ureter maturation	1/258	4/18670	0.0541448	0.284455	0.248249	PAX2	1
GO:0035963	cellular response to interleukin-13	1/258	4/18670	0.0541448	0.284455	0.248249	ALOX15	1
GO:0042320	regulation of circadian sleep/wake cycle, REM sleep	1/258	4/18670	0.0541448	0.284455	0.248249	CRH	1
GO:0042851	L-alanine metabolic process	1/258	4/18670	0.0541448	0.284455	0.248249	AGXT	1
GO:0042853	L-alanine catabolic process	1/258	4/18670	0.0541448	0.284455	0.248249	AGXT	1
GO:0046340	diacylglycerol catabolic process	1/258	4/18670	0.0541448	0.284455	0.248249	APOA2	1
GO:0051919	positive regulation of fibrinolysis	1/258	4/18670	0.0541448	0.284455	0.248249	KLKB1	1
GO:0060160	negative regulation of dopamine receptor signaling pathway	1/258	4/18670	0.0541448	0.284455	0.248249	DRD3	1
GO:0060167	regulation of adenosine receptor signaling pathway	1/258	4/18670	0.0541448	0.284455	0.248249	ACPP	1
GO:0060235	lens induction in camera-type eye	1/258	4/18670	0.0541448	0.284455	0.248249	SIX3	1
GO:0060665	regulation of branching involved in salivary gland morphogenesis by mesenchymal-epithelial signaling	1/258	4/18670	0.0541448	0.284455	0.248249	FGF7	1
GO:0061325	cell proliferation involved in outflow tract morphogenesis	1/258	4/18670	0.0541448	0.284455	0.248249	PITX2	1
GO:0070427	nucleotide-binding oligomerization domain containing 1 signaling pathway	1/258	4/18670	0.0541448	0.284455	0.248249	RIPK2	1
GO:0072021	ascending thin limb development	1/258	4/18670	0.0541448	0.284455	0.248249	UMOD	1
GO:0072039	regulation of mesenchymal cell apoptotic process involved in nephron morphogenesis	1/258	4/18670	0.0541448	0.284455	0.248249	PAX2	1
GO:0072040	negative regulation of mesenchymal cell apoptotic process involved in nephron morphogenesis	1/258	4/18670	0.0541448	0.284455	0.248249	PAX2	1
GO:0072108	positive regulation of mesenchymal to epithelial transition involved in metanephros morphogenesis	1/258	4/18670	0.0541448	0.284455	0.248249	PAX2	1
GO:0072218	metanephric ascending thin limb development	1/258	4/18670	0.0541448	0.284455	0.248249	UMOD	1
GO:0072289	metanephric nephron tubule formation	1/258	4/18670	0.0541448	0.284455	0.248249	PAX2	1
GO:0097029	mature conventional dendritic cell differentiation	1/258	4/18670	0.0541448	0.284455	0.248249	PRTN3	1
GO:0110114	negative regulation of lipid transporter activity	1/258	4/18670	0.0541448	0.284455	0.248249	APOA2	1
GO:1900133	regulation of renin secretion into blood stream	1/258	4/18670	0.0541448	0.284455	0.248249	OR51E2	1
GO:1901145	mesenchymal cell apoptotic process involved in nephron morphogenesis	1/258	4/18670	0.0541448	0.284455	0.248249	PAX2	1
GO:1902809	regulation of skeletal muscle fiber differentiation	1/258	4/18670	0.0541448	0.284455	0.248249	TBX1	1
GO:1904209	positive regulation of chemokine (C-C motif) ligand 2 secretion	1/258	4/18670	0.0541448	0.284455	0.248249	POSTN	1
GO:1990086	lens fiber cell apoptotic process	1/258	4/18670	0.0541448	0.284455	0.248249	SIX3	1
GO:1990523	bone regeneration	1/258	4/18670	0.0541448	0.284455	0.248249	POSTN	1
GO:2000852	regulation of corticosterone secretion	1/258	4/18670	0.0541448	0.284455	0.248249	CRH	1
GO:0032091	negative regulation of protein binding	4/258	103/18670	0.0546188	0.286032	0.249626	CFHR5/MET/WFIKKN2/XIRP1	4
GO:0048259	regulation of receptor-mediated endocytosis	4/258	103/18670	0.0546188	0.286032	0.249626	APOC3/DRD3/NTF3/SELE	4
GO:0008277	regulation of G protein-coupled receptor signaling pathway	5/258	149/18670	0.0561057	0.291908	0.254754	ACPP/DRD3/GUCA1C/MET/RHO	5
GO:0019233	sensory perception of pain	4/258	104/18670	0.0562142	0.291908	0.254754	ACPP/CCK/PTGS2/TRPA1	4
GO:0030593	neutrophil chemotaxis	4/258	104/18670	0.0562142	0.291908	0.254754	CCL18/CCL24/CXCL1/CXCL6	4
GO:0002221	pattern recognition receptor signaling pathway	6/258	197/18670	0.0562638	0.291908	0.254754	BPIFB1/RIPK2/FGB/FGG/MARCO/SFTPA1	6
GO:1904950	negative regulation of establishment of protein localization	6/258	197/18670	0.0562638	0.291908	0.254754	ADTRP/APOA2/CIDEA/DRD3/MIR149/VSNL1	6
GO:0097237	cellular response to toxic substance	7/258	247/18670	0.0562726	0.291908	0.254754	GSTA1/IL6/LCN2/MET/PAX2/PTGS2/TPO	7
GO:0001516	prostaglandin biosynthetic process	2/258	28/18670	0.056826	0.29202	0.254852	PLA2G4F/PTGS2	2
GO:0034368	protein-lipid complex remodeling	2/258	28/18670	0.056826	0.29202	0.254852	APOA2/APOC3	2
GO:0034369	plasma lipoprotein particle remodeling	2/258	28/18670	0.056826	0.29202	0.254852	APOA2/APOC3	2
GO:0034377	plasma lipoprotein particle assembly	2/258	28/18670	0.056826	0.29202	0.254852	APOA2/APOC3	2
GO:0046457	prostanoid biosynthetic process	2/258	28/18670	0.056826	0.29202	0.254852	PLA2G4F/PTGS2	2
GO:1990776	response to angiotensin	2/258	28/18670	0.056826	0.29202	0.254852	MAS1/PTGS2	2
GO:0007626	locomotory behavior	6/258	198/18670	0.057384	0.294428	0.256953	CRH/DMBX1/DRD3/ESPN/MCOLN3/SLC6A3	6
GO:0010769	regulation of cell morphogenesis involved in differentiation	8/258	301/18670	0.0583577	0.298958	0.260907	FGB/FGG/LPAR3/MYOC/NEFL/POSTN/SHOX2/TBR1	8
GO:0046503	glycerolipid catabolic process	3/258	64/18670	0.0587457	0.299549	0.261422	APOA2/APOC3/PLA2G4F	3
GO:0048247	lymphocyte chemotaxis	3/258	64/18670	0.0587457	0.299549	0.261422	CCL18/CCL24/S100A7	3
GO:0060135	maternal process involved in female pregnancy	3/258	64/18670	0.0587457	0.299549	0.261422	DSG2/PTGS2/TCF23	3
GO:0007517	muscle organ development	10/258	410/18670	0.0593989	0.302355	0.263871	ACTC1/ALX4/DMRTA2/P2RX2/PAX7/PHOX2B/SHOX2/TBX1/TCF23/TNNT2	10
GO:0042136	neurotransmitter biosynthetic process	4/258	106/18670	0.0594797	0.302355	0.263871	AGXT/CHAT/PTGS2/SLC6A3	4
GO:0030902	hindbrain development	5/258	152/18670	0.0600931	0.302378	0.263891	HOXB3/NEUROD2/PHOX2B/SSTR3/TBR1	5
GO:0003016	respiratory system process	2/258	29/18670	0.0604939	0.302378	0.263891	ECEL1/PHOX2B	2
GO:0010575	positive regulation of vascular endothelial growth factor production	2/258	29/18670	0.0604939	0.302378	0.263891	IL6/PTGS2	2
GO:0010800	positive regulation of peptidyl-threonine phosphorylation	2/258	29/18670	0.0604939	0.302378	0.263891	RIPK2/CHI3L1	2
GO:0016056	rhodopsin mediated signaling pathway	2/258	29/18670	0.0604939	0.302378	0.263891	GUCA1C/RHO	2
GO:0032372	negative regulation of sterol transport	2/258	29/18670	0.0604939	0.302378	0.263891	APOA2/APOC3	2
GO:0032375	negative regulation of cholesterol transport	2/258	29/18670	0.0604939	0.302378	0.263891	APOA2/APOC3	2
GO:0034367	protein-containing complex remodeling	2/258	29/18670	0.0604939	0.302378	0.263891	APOA2/APOC3	2
GO:0048240	sperm capacitation	2/258	29/18670	0.0604939	0.302378	0.263891	SEMG1/SEMG2	2
GO:0048730	epidermis morphogenesis	2/258	29/18670	0.0604939	0.302378	0.263891	FGF7/KRT17	2
GO:0072606	interleukin-8 secretion	2/258	29/18670	0.0604939	0.302378	0.263891	CHI3L1/CRP	2
GO:0050905	neuromuscular process	4/258	107/18670	0.0611497	0.303727	0.265069	CLRN1/DRD3/NEFL/SLC6A3	4
GO:0015696	ammonium transport	4/258	108/18670	0.0628443	0.303727	0.265069	CRH/DRD3/SLC18A3/SLC6A3	4
GO:0007274	neuromuscular synaptic transmission	2/258	30/18670	0.0642407	0.303727	0.265069	CHAT/P2RX2	2
GO:0042759	long-chain fatty acid biosynthetic process	2/258	30/18670	0.0642407	0.303727	0.265069	ALOX15/PTGS2	2
GO:0048384	retinoic acid receptor signaling pathway	2/258	30/18670	0.0642407	0.303727	0.265069	CYP26A1/TBX1	2
GO:0022409	positive regulation of cell-cell adhesion	7/258	255/18670	0.0644625	0.303727	0.265069	ALOX15/RIPK2/CD70/FGB/FGG/IL6/TESPA1	7
GO:0030858	positive regulation of epithelial cell differentiation	3/258	67/18670	0.0655789	0.303727	0.265069	ATOH1/KDF1/PAX2	3
GO:0050909	sensory perception of taste	3/258	67/18670	0.0655789	0.303727	0.265069	CALHM1/LCN1/P2RX2	3
GO:0051705	multi-organism behavior	3/258	67/18670	0.0655789	0.303727	0.265069	DRD3/NPAS4/TBX1	3
GO:0071222	cellular response to lipopolysaccharide	6/258	205/18670	0.0655995	0.303727	0.265069	RIPK2/CSF3/CXCL1/CXCL6/IL6/LCN2	6
GO:0051222	positive regulation of protein transport	10/258	418/18670	0.0658003	0.303727	0.265069	RIPK2/CRH/FGB/FGG/IL26/IL6/OR51E2/POSTN/PTGS2/VSNL1	10
GO:0010038	response to metal ion	9/258	364/18670	0.0667731	0.303727	0.265069	ALOX15/CPNE7/FGB/FGG/KRT14/NEUROD2/PTGS2/SLC6A3/TNNT2	9
GO:0001661	conditioned taste aversion	1/258	5/18670	0.0672184	0.303727	0.265069	TBR1	1
GO:0002309	T cell proliferation involved in immune response	1/258	5/18670	0.0672184	0.303727	0.265069	TNFSF18	1
GO:0003164	His-Purkinje system development	1/258	5/18670	0.0672184	0.303727	0.265069	DSG2	1
GO:0006522	alanine metabolic process	1/258	5/18670	0.0672184	0.303727	0.265069	AGXT	1
GO:0006524	alanine catabolic process	1/258	5/18670	0.0672184	0.303727	0.265069	AGXT	1
GO:0007343	egg activation	1/258	5/18670	0.0672184	0.303727	0.265069	PLCZ1	1
GO:0008291	acetylcholine metabolic process	1/258	5/18670	0.0672184	0.303727	0.265069	CHAT	1
GO:0009078	pyruvate family amino acid metabolic process	1/258	5/18670	0.0672184	0.303727	0.265069	AGXT	1
GO:0009080	pyruvate family amino acid catabolic process	1/258	5/18670	0.0672184	0.303727	0.265069	AGXT	1
GO:0009912	auditory receptor cell fate commitment	1/258	5/18670	0.0672184	0.303727	0.265069	ATOH1	1
GO:0010387	COP9 signalosome assembly	1/258	5/18670	0.0672184	0.303727	0.265069	TESPA1	1
GO:0010897	negative regulation of triglyceride catabolic process	1/258	5/18670	0.0672184	0.303727	0.265069	APOC3	1
GO:0010915	regulation of very-low-density lipoprotein particle clearance	1/258	5/18670	0.0672184	0.303727	0.265069	APOC3	1
GO:0021563	glossopharyngeal nerve development	1/258	5/18670	0.0672184	0.303727	0.265069	HOXB3	1
GO:0021650	vestibulocochlear nerve formation	1/258	5/18670	0.0672184	0.303727	0.265069	PAX2	1
GO:0031133	regulation of axon diameter	1/258	5/18670	0.0672184	0.303727	0.265069	NEFL	1
GO:0032907	transforming growth factor beta3 production	1/258	5/18670	0.0672184	0.303727	0.265069	MIR149	1
GO:0032910	regulation of transforming growth factor beta3 production	1/258	5/18670	0.0672184	0.303727	0.265069	MIR149	1
GO:0035442	dipeptide transmembrane transport	1/258	5/18670	0.0672184	0.303727	0.265069	SLC15A1	1
GO:0035483	gastric emptying	1/258	5/18670	0.0672184	0.303727	0.265069	DRD3	1
GO:0035934	corticosterone secretion	1/258	5/18670	0.0672184	0.303727	0.265069	CRH	1
GO:0035962	response to interleukin-13	1/258	5/18670	0.0672184	0.303727	0.265069	ALOX15	1
GO:0038163	thrombopoietin-mediated signaling pathway	1/258	5/18670	0.0672184	0.303727	0.265069	THPO	1
GO:0038169	somatostatin receptor signaling pathway	1/258	5/18670	0.0672184	0.303727	0.265069	SSTR3	1
GO:0038170	somatostatin signaling pathway	1/258	5/18670	0.0672184	0.303727	0.265069	SSTR3	1
GO:0042321	negative regulation of circadian sleep/wake cycle, sleep	1/258	5/18670	0.0672184	0.303727	0.265069	CRH	1
GO:0042938	dipeptide transport	1/258	5/18670	0.0672184	0.303727	0.265069	SLC15A1	1
GO:0045918	negative regulation of cytolysis	1/258	5/18670	0.0672184	0.303727	0.265069	PAX2	1
GO:0051121	hepoxilin metabolic process	1/258	5/18670	0.0672184	0.303727	0.265069	ALOX15	1
GO:0051122	hepoxilin biosynthetic process	1/258	5/18670	0.0672184	0.303727	0.265069	ALOX15	1
GO:0051461	positive regulation of corticotropin secretion	1/258	5/18670	0.0672184	0.303727	0.265069	CRH	1
GO:0051464	positive regulation of cortisol secretion	1/258	5/18670	0.0672184	0.303727	0.265069	CRH	1
GO:0060023	soft palate development	1/258	5/18670	0.0672184	0.303727	0.265069	TBX1	1
GO:0060120	inner ear receptor cell fate commitment	1/258	5/18670	0.0672184	0.303727	0.265069	ATOH1	1
GO:0060126	somatotropin secreting cell differentiation	1/258	5/18670	0.0672184	0.303727	0.265069	PITX2	1
GO:0060161	positive regulation of dopamine receptor signaling pathway	1/258	5/18670	0.0672184	0.303727	0.265069	DRD3	1
GO:0060501	positive regulation of epithelial cell proliferation involved in lung morphogenesis	1/258	5/18670	0.0672184	0.303727	0.265069	FGF7	1
GO:0070093	negative regulation of glucagon secretion	1/258	5/18670	0.0672184	0.303727	0.265069	CRH	1
GO:0070945	neutrophil mediated killing of gram-negative bacterium	1/258	5/18670	0.0672184	0.303727	0.265069	CXCL6	1
GO:0071224	cellular response to peptidoglycan	1/258	5/18670	0.0672184	0.303727	0.265069	RIPK2	1
GO:0071284	cellular response to lead ion	1/258	5/18670	0.0672184	0.303727	0.265069	PTGS2	1
GO:0072162	metanephric mesenchymal cell differentiation	1/258	5/18670	0.0672184	0.303727	0.265069	PAX2	1
GO:0072179	nephric duct formation	1/258	5/18670	0.0672184	0.303727	0.265069	PAX2	1
GO:0072236	metanephric loop of Henle development	1/258	5/18670	0.0672184	0.303727	0.265069	UMOD	1
GO:0072300	positive regulation of metanephric glomerulus development	1/258	5/18670	0.0672184	0.303727	0.265069	PAX2	1
GO:0090131	mesenchyme migration	1/258	5/18670	0.0672184	0.303727	0.265069	ACTC1	1
GO:0090271	positive regulation of fibroblast growth factor production	1/258	5/18670	0.0672184	0.303727	0.265069	PTGS2	1
GO:0090325	regulation of locomotion involved in locomotory behavior	1/258	5/18670	0.0672184	0.303727	0.265069	DRD3	1
GO:1900619	acetate ester metabolic process	1/258	5/18670	0.0672184	0.303727	0.265069	CHAT	1
GO:1902035	positive regulation of hematopoietic stem cell proliferation	1/258	5/18670	0.0672184	0.303727	0.265069	THPO	1
GO:1902219	negative regulation of intrinsic apoptotic signaling pathway in response to osmotic stress	1/258	5/18670	0.0672184	0.303727	0.265069	PTGS2	1
GO:1902512	positive regulation of apoptotic DNA fragmentation	1/258	5/18670	0.0672184	0.303727	0.265069	IL6	1
GO:1904207	regulation of chemokine (C-C motif) ligand 2 secretion	1/258	5/18670	0.0672184	0.303727	0.265069	POSTN	1
GO:1904673	negative regulation of somatic stem cell population maintenance	1/258	5/18670	0.0672184	0.303727	0.265069	PAX2	1
GO:1905098	negative regulation of guanyl-nucleotide exchange factor activity	1/258	5/18670	0.0672184	0.303727	0.265069	MET	1
GO:2000172	regulation of branching morphogenesis of a nerve	1/258	5/18670	0.0672184	0.303727	0.265069	SHOX2	1
GO:2000416	regulation of eosinophil migration	1/258	5/18670	0.0672184	0.303727	0.265069	CCL24	1
GO:2000660	negative regulation of interleukin-1-mediated signaling pathway	1/258	5/18670	0.0672184	0.303727	0.265069	IL6	1
GO:0019915	lipid storage	3/258	68/18670	0.0679343	0.304259	0.265533	CIDEA/CRP/IL6	3
GO:0050918	positive chemotaxis	3/258	68/18670	0.0679343	0.304259	0.265533	FGF7/MET/NTF3	3
GO:0030431	sleep	2/258	31/18670	0.0680634	0.304259	0.265533	CRH/DRD3	2
GO:0033198	response to ATP	2/258	31/18670	0.0680634	0.304259	0.265533	P2RX2/PTGS2	2
GO:0050482	arachidonic acid secretion	2/258	31/18670	0.0680634	0.304259	0.265533	DRD3/PLA2G4F	2
GO:1903963	arachidonate transport	2/258	31/18670	0.0680634	0.304259	0.265533	DRD3/PLA2G4F	2
GO:0002064	epithelial cell development	6/258	207/18670	0.068067	0.304259	0.265533	CLRN1/HNF4A/KDF1/MET/ROS1/SIX3	6
GO:1904019	epithelial cell apoptotic process	4/258	111/18670	0.068075	0.304259	0.265533	FGB/FGG/IL6/SIX3	4
GO:0003007	heart morphogenesis	7/258	259/18670	0.0688153	0.306833	0.267779	ACTC1/COL2A1/DNAH11/PITX2/SHOX2/TBX1/TNNT2	7
GO:0046879	hormone secretion	8/258	312/18670	0.0688371	0.306833	0.267779	CRH/FGB/FGG/HNF4A/HNF1A/IL6/MAFA/VSNL1	8
GO:0007623	circadian rhythm	6/258	208/18670	0.0693209	0.308572	0.269296	CRH/DRD3/HNF4A/NPS/PROKR2/SIX3	6
GO:0015909	long-chain fatty acid transport	3/258	69/18670	0.0703278	0.312631	0.272839	DRD3/LCN1/PLA2G4F	3
GO:0051216	cartilage development	6/258	209/18670	0.070588	0.313365	0.27348	CHI3L1/COL2A1/HOXB3/PAX7/SHOX2/CCN4	6
GO:0032228	regulation of synaptic transmission, GABAergic	2/258	32/18670	0.0719592	0.316045	0.275818	NPAS4/NPS	2
GO:0035587	purinergic receptor signaling pathway	2/258	32/18670	0.0719592	0.316045	0.275818	ACPP/P2RX2	2
GO:0038128	ERBB2 signaling pathway	2/258	32/18670	0.0719592	0.316045	0.275818	MYOC/PTPRR	2
GO:0045745	positive regulation of G protein-coupled receptor signaling pathway	2/258	32/18670	0.0719592	0.316045	0.275818	ACPP/DRD3	2
GO:0048741	skeletal muscle fiber development	2/258	32/18670	0.0719592	0.316045	0.275818	P2RX2/SHOX2	2
GO:0051968	positive regulation of synaptic transmission, glutamatergic	2/258	32/18670	0.0719592	0.316045	0.275818	NPS/PTGS2	2
GO:0065005	protein-lipid complex assembly	2/258	32/18670	0.0719592	0.316045	0.275818	APOA2/APOC3	2
GO:0070207	protein homotrimerization	2/258	32/18670	0.0719592	0.316045	0.275818	ITLN1/LCN2	2
GO:0015850	organic hydroxy compound transport	7/258	262/18670	0.0721931	0.31665	0.276346	ABCB11/APOA2/APOC3/CRH/DRD3/SLC6A3/SLCO1B1	7
GO:0048880	sensory system development	9/258	371/18670	0.0732672	0.320934	0.280085	CPAMD8/KERA/MAB21L2/PAX2/PHOX2B/PITX2/PRPH2/RHO/SIX3	9
GO:0042752	regulation of circadian rhythm	4/258	114/18670	0.073524	0.321631	0.280693	CRH/DRD3/HNF4A/NPS	4
GO:0071219	cellular response to molecule of bacterial origin	6/258	212/18670	0.0744695	0.324586	0.283273	RIPK2/CSF3/CXCL1/CXCL6/IL6/LCN2	6
GO:0042531	positive regulation of tyrosine phosphorylation of STAT protein	3/258	71/18670	0.0752273	0.324586	0.283273	IL31RA/IL6/TNFSF18	3
GO:0010927	cellular component assembly involved in morphogenesis	4/258	115/18670	0.0753882	0.324586	0.283273	ACTC1/CSRP1/MYH11/TNNT2	4
GO:0010092	specification of animal organ identity	2/258	33/18670	0.0759255	0.324586	0.283273	PAX2/TBR1	2
GO:0010464	regulation of mesenchymal cell proliferation	2/258	33/18670	0.0759255	0.324586	0.283273	SHOX2/TBX1	2
GO:0010837	regulation of keratinocyte proliferation	2/258	33/18670	0.0759255	0.324586	0.283273	FGF7/KDF1	2
GO:0035115	embryonic forelimb morphogenesis	2/258	33/18670	0.0759255	0.324586	0.283273	ALX4/SHOX2	2
GO:0035774	positive regulation of insulin secretion involved in cellular response to glucose stimulus	2/258	33/18670	0.0759255	0.324586	0.283273	CRH/VSNL1	2
GO:0048536	spleen development	2/258	33/18670	0.0759255	0.324586	0.283273	BARX1/PITX2	2
GO:1902692	regulation of neuroblast proliferation	2/258	33/18670	0.0759255	0.324586	0.283273	DMRTA2/SIX3	2
GO:2000352	negative regulation of endothelial cell apoptotic process	2/258	33/18670	0.0759255	0.324586	0.283273	FGB/FGG	2
GO:0021987	cerebral cortex development	4/258	116/18670	0.0772761	0.324586	0.283273	ATOH1/DMRTA2/NEFL/TBR1	4
GO:0070252	actin-mediated cell contraction	4/258	116/18670	0.0772761	0.324586	0.283273	ACTC1/DES/DSG2/TNNT2	4
GO:0007613	memory	4/258	117/18670	0.0791876	0.324586	0.283273	CCK/NPAS4/NTF3/PTGS2	4
GO:0006816	calcium ion transport	10/258	434/18670	0.0798905	0.324586	0.283273	CALHM1/CLCA1/CRH/LPAR3/MCOLN3/P2RX2/PLCZ1/PTGS2/SEMG1/TRPA1	10
GO:0007603	phototransduction, visible light	2/258	34/18670	0.0799596	0.324586	0.283273	GUCA1C/RHO	2
GO:0010574	regulation of vascular endothelial growth factor production	2/258	34/18670	0.0799596	0.324586	0.283273	IL6/PTGS2	2
GO:0048048	embryonic eye morphogenesis	2/258	34/18670	0.0799596	0.324586	0.283273	PAX2/SIX3	2
GO:0070050	neuron cellular homeostasis	2/258	34/18670	0.0799596	0.324586	0.283273	IL6/SCGN	2
GO:0001999	renal response to blood flow involved in circulatory renin-angiotensin regulation of systemic arterial blood pressure	1/258	6/18670	0.0801119	0.324586	0.283273	OR51E2	1
GO:0002001	renin secretion into blood stream	1/258	6/18670	0.0801119	0.324586	0.283273	OR51E2	1
GO:0002740	negative regulation of cytokine secretion involved in immune response	1/258	6/18670	0.0801119	0.324586	0.283273	APOA2	1
GO:0002775	antimicrobial peptide production	1/258	6/18670	0.0801119	0.324586	0.283273	KLK3	1
GO:0002778	antibacterial peptide production	1/258	6/18670	0.0801119	0.324586	0.283273	KLK3	1
GO:0016115	terpenoid catabolic process	1/258	6/18670	0.0801119	0.324586	0.283273	CYP26A1	1
GO:0021631	optic nerve morphogenesis	1/258	6/18670	0.0801119	0.324586	0.283273	PAX2	1
GO:0031394	positive regulation of prostaglandin biosynthetic process	1/258	6/18670	0.0801119	0.324586	0.283273	PTGS2	1
GO:0032415	regulation of sodium:proton antiporter activity	1/258	6/18670	0.0801119	0.324586	0.283273	DRD3	1
GO:0032811	negative regulation of epinephrine secretion	1/258	6/18670	0.0801119	0.324586	0.283273	CRH	1
GO:0036265	RNA (guanine-N7)-methylation	1/258	6/18670	0.0801119	0.324586	0.283273	RNMT	1
GO:0038031	non-canonical Wnt signaling pathway via JNK cascade	1/258	6/18670	0.0801119	0.324586	0.283273	MYOC	1
GO:0042747	circadian sleep/wake cycle, REM sleep	1/258	6/18670	0.0801119	0.324586	0.283273	CRH	1
GO:0043152	induction of bacterial agglutination	1/258	6/18670	0.0801119	0.324586	0.283273	FGB	1
GO:0043400	cortisol secretion	1/258	6/18670	0.0801119	0.324586	0.283273	CRH	1
GO:0045627	positive regulation of T-helper 1 cell differentiation	1/258	6/18670	0.0801119	0.324586	0.283273	RIPK2	1
GO:0048664	neuron fate determination	1/258	6/18670	0.0801119	0.324586	0.283273	ATOH1	1
GO:0050916	sensory perception of sweet taste	1/258	6/18670	0.0801119	0.324586	0.283273	CALHM1	1
GO:0050917	sensory perception of umami taste	1/258	6/18670	0.0801119	0.324586	0.283273	CALHM1	1
GO:0051459	regulation of corticotropin secretion	1/258	6/18670	0.0801119	0.324586	0.283273	CRH	1
GO:0051462	regulation of cortisol secretion	1/258	6/18670	0.0801119	0.324586	0.283273	CRH	1
GO:0061074	regulation of neural retina development	1/258	6/18670	0.0801119	0.324586	0.283273	SIX3	1
GO:0071389	cellular response to mineralocorticoid stimulus	1/258	6/18670	0.0801119	0.324586	0.283273	NPAS4	1
GO:0072038	mesenchymal stem cell maintenance involved in nephron morphogenesis	1/258	6/18670	0.0801119	0.324586	0.283273	PAX2	1
GO:0072174	metanephric tubule formation	1/258	6/18670	0.0801119	0.324586	0.283273	PAX2	1
GO:0072298	regulation of metanephric glomerulus development	1/258	6/18670	0.0801119	0.324586	0.283273	PAX2	1
GO:0086073	bundle of His cell-Purkinje myocyte adhesion involved in cell communication	1/258	6/18670	0.0801119	0.324586	0.283273	DSG2	1
GO:0098528	skeletal muscle fiber differentiation	1/258	6/18670	0.0801119	0.324586	0.283273	TBX1	1
GO:0110112	regulation of lipid transporter activity	1/258	6/18670	0.0801119	0.324586	0.283273	APOA2	1
GO:1901166	neural crest cell migration involved in autonomic nervous system development	1/258	6/18670	0.0801119	0.324586	0.283273	PHOX2B	1
GO:1901374	acetate ester transport	1/258	6/18670	0.0801119	0.324586	0.283273	SLC18A3	1
GO:1902218	regulation of intrinsic apoptotic signaling pathway in response to osmotic stress	1/258	6/18670	0.0801119	0.324586	0.283273	PTGS2	1
GO:1902338	negative regulation of apoptotic process involved in morphogenesis	1/258	6/18670	0.0801119	0.324586	0.283273	PAX2	1
GO:1903626	positive regulation of DNA catabolic process	1/258	6/18670	0.0801119	0.324586	0.283273	IL6	1
GO:1903935	response to sodium arsenite	1/258	6/18670	0.0801119	0.324586	0.283273	NEFL	1
GO:1904415	regulation of xenophagy	1/258	6/18670	0.0801119	0.324586	0.283273	RIPK2	1
GO:1904417	positive regulation of xenophagy	1/258	6/18670	0.0801119	0.324586	0.283273	RIPK2	1
GO:1904746	negative regulation of apoptotic process involved in development	1/258	6/18670	0.0801119	0.324586	0.283273	PAX2	1
GO:2000851	positive regulation of glucocorticoid secretion	1/258	6/18670	0.0801119	0.324586	0.283273	CRH	1
GO:2001300	lipoxin metabolic process	1/258	6/18670	0.0801119	0.324586	0.283273	ALOX15	1
GO:2001301	lipoxin biosynthetic process	1/258	6/18670	0.0801119	0.324586	0.283273	ALOX15	1
GO:0043627	response to estrogen	3/258	73/18670	0.0802737	0.324842	0.283496	APOA2/CRH/SLC34A2	3
GO:0006836	neurotransmitter transport	7/258	269/18670	0.0804516	0.325163	0.283776	CHAT/CRH/DRD3/SLC18A3/SLC6A18/SLC6A3/SLC6A7	7
GO:0043393	regulation of protein binding	6/258	217/18670	0.0812043	0.327401	0.285729	RIPK2/CFHR5/CSF3/MET/WFIKKN2/XIRP1	6
GO:0060348	bone development	6/258	217/18670	0.0812043	0.327401	0.285729	COL2A1/MYOC/PITX2/SHOX2/THPO/CCN4	6
GO:1901568	fatty acid derivative metabolic process	5/258	167/18670	0.0823776	0.331726	0.289503	ALOX15/FADS1/GSTA1/PLA2G4F/PTGS2	5
GO:0050710	negative regulation of cytokine secretion	3/258	74/18670	0.0828508	0.332818	0.290456	APOA2/CIDEA/MIR149	3
GO:1901616	organic hydroxy compound catabolic process	3/258	74/18670	0.0828508	0.332818	0.290456	AKR1D1/SLC6A3/SULT2A1	3
GO:0048762	mesenchymal cell differentiation	6/258	219/18670	0.0839907	0.335217	0.292551	IL6/MIR149/PAX2/PHOX2B/PITX2/TBX1	6
GO:0050806	positive regulation of synaptic transmission	5/258	168/18670	0.0840004	0.335217	0.292551	CRH/NPS/NRGN/PTGS2/SCGN	5
GO:0001893	maternal placenta development	2/258	35/18670	0.0840588	0.335217	0.292551	PTGS2/TCF23	2
GO:0014904	myotube cell development	2/258	35/18670	0.0840588	0.335217	0.292551	P2RX2/SHOX2	2
GO:0034142	toll-like receptor 4 signaling pathway	2/258	35/18670	0.0840588	0.335217	0.292551	BPIFB1/RIPK2	2
GO:0098801	regulation of renal system process	2/258	35/18670	0.0840588	0.335217	0.292551	DRD3/OR51E2	2
GO:0072089	stem cell proliferation	4/258	120/18670	0.0850623	0.338809	0.295685	DMRTA2/KDF1/SIX3/THPO	4
GO:0007422	peripheral nervous system development	3/258	75/18670	0.0854632	0.339373	0.296177	GFRA3/MYOC/NTF3	3
GO:0051100	negative regulation of binding	5/258	169/18670	0.08564	0.339373	0.296177	CFHR5/MET/GTPBP4/WFIKKN2/XIRP1	5
GO:0016485	protein processing	8/258	328/18670	0.0860228	0.339373	0.296177	RIPK2/CFHR5/FGB/FGG/IGHG4/KLK2/KLK3/KLKB1	8
GO:0042119	neutrophil activation	11/258	498/18670	0.0860492	0.339373	0.296177	ACPP/CHI3L1/CXCL1/CXCL6/DNASE1L3/HSPA6/KRT1/LCN2/PRTN3/PTPRB/S100A7	11
GO:0010811	positive regulation of cell-substrate adhesion	4/258	121/18670	0.0870667	0.339373	0.296177	ALOX15/FGB/FGG/MYOC	4
GO:0042692	muscle cell differentiation	9/258	385/18670	0.0873925	0.339373	0.296177	ACTC1/CSRP1/FBXO40/MYH11/P2RX2/SHOX2/TBX1/TNNT2/WFIKKN2	9
GO:0042310	vasoconstriction	3/258	76/18670	0.0881103	0.339373	0.296177	FGB/FGG/PTGS2	3
GO:0006699	bile acid biosynthetic process	2/258	36/18670	0.0882206	0.339373	0.296177	ABCB11/AKR1D1	2
GO:0010573	vascular endothelial growth factor production	2/258	36/18670	0.0882206	0.339373	0.296177	IL6/PTGS2	2
GO:0071634	regulation of transforming growth factor beta production	2/258	36/18670	0.0882206	0.339373	0.296177	MIR149/PTGS2	2
GO:2000310	regulation of NMDA receptor activity	2/258	36/18670	0.0882206	0.339373	0.296177	CRH/NEFL	2
GO:0044706	multi-multicellular organism process	6/258	222/18670	0.0882688	0.339373	0.296177	AMBP/CRH/DSG2/PTGS2/SEMG1/TCF23	6
GO:0045444	fat cell differentiation	6/258	223/18670	0.089721	0.339373	0.296177	C1QL4/IL6/PTGS2/PTPRQ/WIF1/CCN4	6
GO:0051937	catecholamine transport	3/258	77/18670	0.0907917	0.339373	0.296177	CRH/DRD3/SLC6A3	3
GO:0030595	leukocyte chemotaxis	6/258	224/18670	0.0911862	0.339373	0.296177	CCL18/CCL24/CXCL1/CXCL6/IL6/S100A7	6
GO:0060485	mesenchyme development	7/258	278/18670	0.0918422	0.339373	0.296177	ACTC1/IL6/MIR149/PAX2/PHOX2B/PITX2/TBX1	7
GO:0031076	embryonic camera-type eye development	2/258	37/18670	0.0924425	0.339373	0.296177	PAX2/SIX3	2
GO:0034405	response to fluid shear stress	2/258	37/18670	0.0924425	0.339373	0.296177	PTGS2/TFPI2	2
GO:0071542	dopaminergic neuron differentiation	2/258	37/18670	0.0924425	0.339373	0.296177	DMRTA2/PHOX2B	2
GO:2000249	regulation of actin cytoskeleton reorganization	2/258	37/18670	0.0924425	0.339373	0.296177	CSF3/NTF3	2
GO:0003253	cardiac neural crest cell migration involved in outflow tract morphogenesis	1/258	7/18670	0.0928279	0.339373	0.296177	PITX2	1
GO:0003330	regulation of extracellular matrix constituent secretion	1/258	7/18670	0.0928279	0.339373	0.296177	ADTRP	1
GO:0003357	noradrenergic neuron differentiation	1/258	7/18670	0.0928279	0.339373	0.296177	PHOX2B	1
GO:0003360	brainstem development	1/258	7/18670	0.0928279	0.339373	0.296177	PHOX2B	1
GO:0006787	porphyrin-containing compound catabolic process	1/258	7/18670	0.0928279	0.339373	0.296177	AMBP	1
GO:0010046	response to mycotoxin	1/258	7/18670	0.0928279	0.339373	0.296177	LCN2	1
GO:0010890	positive regulation of sequestering of triglyceride	1/258	7/18670	0.0928279	0.339373	0.296177	CIDEA	1
GO:0010982	regulation of high-density lipoprotein particle clearance	1/258	7/18670	0.0928279	0.339373	0.296177	APOC3	1
GO:0014062	regulation of serotonin secretion	1/258	7/18670	0.0928279	0.339373	0.296177	CRH	1
GO:0014832	urinary bladder smooth muscle contraction	1/258	7/18670	0.0928279	0.339373	0.296177	P2RX2	1
GO:0014848	urinary tract smooth muscle contraction	1/258	7/18670	0.0928279	0.339373	0.296177	P2RX2	1
GO:0021546	rhombomere development	1/258	7/18670	0.0928279	0.339373	0.296177	HOXB3	1
GO:0021648	vestibulocochlear nerve morphogenesis	1/258	7/18670	0.0928279	0.339373	0.296177	PAX2	1
GO:0021796	cerebral cortex regionalization	1/258	7/18670	0.0928279	0.339373	0.296177	DMRTA2	1
GO:0021798	forebrain dorsal/ventral pattern formation	1/258	7/18670	0.0928279	0.339373	0.296177	SIX3	1
GO:0021902	commitment of neuronal cell to specific neuron type in forebrain	1/258	7/18670	0.0928279	0.339373	0.296177	TBR1	1
GO:0030046	parallel actin filament bundle assembly	1/258	7/18670	0.0928279	0.339373	0.296177	ESPN	1
GO:0030300	regulation of intestinal cholesterol absorption	1/258	7/18670	0.0928279	0.339373	0.296177	APOA2	1
GO:0031622	positive regulation of fever generation	1/258	7/18670	0.0928279	0.339373	0.296177	PTGS2	1
GO:0032277	negative regulation of gonadotropin secretion	1/258	7/18670	0.0928279	0.339373	0.296177	CRH	1
GO:0032489	regulation of Cdc42 protein signal transduction	1/258	7/18670	0.0928279	0.339373	0.296177	APOC3	1
GO:0033015	tetrapyrrole catabolic process	1/258	7/18670	0.0928279	0.339373	0.296177	AMBP	1
GO:0033684	regulation of luteinizing hormone secretion	1/258	7/18670	0.0928279	0.339373	0.296177	CRH	1
GO:0035482	gastric motility	1/258	7/18670	0.0928279	0.339373	0.296177	DRD3	1
GO:0035524	proline transmembrane transport	1/258	7/18670	0.0928279	0.339373	0.296177	SLC6A7	1
GO:0038030	non-canonical Wnt signaling pathway via MAPK cascade	1/258	7/18670	0.0928279	0.339373	0.296177	MYOC	1
GO:0042167	heme catabolic process	1/258	7/18670	0.0928279	0.339373	0.296177	AMBP	1
GO:0042723	thiamine-containing compound metabolic process	1/258	7/18670	0.0928279	0.339373	0.296177	ACPP	1
GO:0045162	clustering of voltage-gated sodium channels	1/258	7/18670	0.0928279	0.339373	0.296177	MYOC	1
GO:0045654	positive regulation of megakaryocyte differentiation	1/258	7/18670	0.0928279	0.339373	0.296177	THPO	1
GO:0046149	pigment catabolic process	1/258	7/18670	0.0928279	0.339373	0.296177	AMBP	1
GO:0048752	semicircular canal morphogenesis	1/258	7/18670	0.0928279	0.339373	0.296177	TBX1	1
GO:0050957	equilibrioception	1/258	7/18670	0.0928279	0.339373	0.296177	CLRN1	1
GO:0051005	negative regulation of lipoprotein lipase activity	1/258	7/18670	0.0928279	0.339373	0.296177	APOC3	1
GO:0051388	positive regulation of neurotrophin TRK receptor signaling pathway	1/258	7/18670	0.0928279	0.339373	0.296177	NTF3	1
GO:0051458	corticotropin secretion	1/258	7/18670	0.0928279	0.339373	0.296177	CRH	1
GO:0060017	parathyroid gland development	1/258	7/18670	0.0928279	0.339373	0.296177	TBX1	1
GO:0060437	lung growth	1/258	7/18670	0.0928279	0.339373	0.296177	FGF7	1
GO:0070944	neutrophil mediated killing of bacterium	1/258	7/18670	0.0928279	0.339373	0.296177	CXCL6	1
GO:0072257	metanephric nephron tubule epithelial cell differentiation	1/258	7/18670	0.0928279	0.339373	0.296177	PAX2	1
GO:0072307	regulation of metanephric nephron tubule epithelial cell differentiation	1/258	7/18670	0.0928279	0.339373	0.296177	PAX2	1
GO:0086042	cardiac muscle cell-cardiac muscle cell adhesion	1/258	7/18670	0.0928279	0.339373	0.296177	DSG2	1
GO:0097065	anterior head development	1/258	7/18670	0.0928279	0.339373	0.296177	COL2A1	1
GO:0097577	sequestering of iron ion	1/258	7/18670	0.0928279	0.339373	0.296177	LCN2	1
GO:1901299	negative regulation of hydrogen peroxide-mediated programmed cell death	1/258	7/18670	0.0928279	0.339373	0.296177	MET	1
GO:1902866	regulation of retina development in camera-type eye	1/258	7/18670	0.0928279	0.339373	0.296177	SIX3	1
GO:1903998	regulation of eating behavior	1/258	7/18670	0.0928279	0.339373	0.296177	CCK	1
GO:1904058	positive regulation of sensory perception of pain	1/258	7/18670	0.0928279	0.339373	0.296177	CCK	1
GO:1904672	regulation of somatic stem cell population maintenance	1/258	7/18670	0.0928279	0.339373	0.296177	PAX2	1
GO:1904729	regulation of intestinal lipid absorption	1/258	7/18670	0.0928279	0.339373	0.296177	APOA2	1
GO:1905097	regulation of guanyl-nucleotide exchange factor activity	1/258	7/18670	0.0928279	0.339373	0.296177	MET	1
GO:2000553	positive regulation of T-helper 2 cell cytokine production	1/258	7/18670	0.0928279	0.339373	0.296177	IL6	1
GO:2000659	regulation of interleukin-1-mediated signaling pathway	1/258	7/18670	0.0928279	0.339373	0.296177	IL6	1
GO:2000794	regulation of epithelial cell proliferation involved in lung morphogenesis	1/258	7/18670	0.0928279	0.339373	0.296177	FGF7	1
GO:0072347	response to anesthetic	3/258	78/18670	0.0935068	0.341476	0.298013	CRH/DRD3/SLC6A3	3
GO:0051495	positive regulation of cytoskeleton organization	6/258	226/18670	0.0941554	0.343464	0.299748	ALOX15/CCL24/CSF3/MET/MYOC/NTF3	6
GO:0007159	leukocyte cell-cell adhesion	8/258	337/18670	0.0967022	0.349876	0.305344	ADTRP/RIPK2/CD70/CLEC4M/IL6/SELE/TESPA1/UMOD	8
GO:0006656	phosphatidylcholine biosynthetic process	2/258	38/18670	0.0967221	0.349876	0.305344	APOA2/CHAT	2
GO:0010831	positive regulation of myotube differentiation	2/258	38/18670	0.0967221	0.349876	0.305344	SHOX2/TBX1	2
GO:0015804	neutral amino acid transport	2/258	38/18670	0.0967221	0.349876	0.305344	SLC6A18/SLC6A7	2
GO:0045494	photoreceptor cell maintenance	2/258	38/18670	0.0967221	0.349876	0.305344	CLRN1/RHO	2
GO:0071604	transforming growth factor beta production	2/258	38/18670	0.0967221	0.349876	0.305344	MIR149/PTGS2	2
GO:1902742	apoptotic process involved in development	2/258	38/18670	0.0967221	0.349876	0.305344	PAX2/SIX3	2
GO:0006979	response to oxidative stress	10/258	451/18670	0.096763	0.349876	0.305344	CA3/IL6/KRT1/LCN2/MET/PAX2/PTGS2/S100A7/TPO/TRPA1	10
GO:0051258	protein polymerization	7/258	283/18670	0.0985424	0.35592	0.310618	ALOX15/CCL24/CSF3/FGB/FGG/MET/NEFL	7
GO:0048469	cell maturation	5/258	177/18670	0.0993554	0.356241	0.310898	FGG/MYOC/SEMG1/SEMG2/SIX3	5
GO:0002251	organ or tissue specific immune response	2/258	39/18670	0.101057	0.356241	0.310898	BPIFB1/IL6	2
GO:0007210	serotonin receptor signaling pathway	2/258	39/18670	0.101057	0.356241	0.310898	HTR3B/OR6T1	2
GO:0042417	dopamine metabolic process	2/258	39/18670	0.101057	0.356241	0.310898	DRD3/SLC6A3	2
GO:0051930	regulation of sensory perception of pain	2/258	39/18670	0.101057	0.356241	0.310898	ACPP/CCK	2
GO:0055090	acylglycerol homeostasis	2/258	39/18670	0.101057	0.356241	0.310898	APOC3/HNF4A	2
GO:0070328	triglyceride homeostasis	2/258	39/18670	0.101057	0.356241	0.310898	APOC3/HNF4A	2
GO:1902042	negative regulation of extrinsic apoptotic signaling pathway via death domain receptors	2/258	39/18670	0.101057	0.356241	0.310898	FGB/FGG	2
GO:2000648	positive regulation of stem cell proliferation	2/258	39/18670	0.101057	0.356241	0.310898	DMRTA2/THPO	2
GO:0002687	positive regulation of leukocyte migration	4/258	128/18670	0.101726	0.356241	0.310898	CCL24/IL6/S100A7/TNFSF18	4
GO:0014032	neural crest cell development	3/258	81/18670	0.101849	0.356241	0.310898	PHOX2B/PITX2/TBX1	3
GO:0021766	hippocampus development	3/258	81/18670	0.101849	0.356241	0.310898	MAS1/NEFL/NEUROD6	3
GO:1904951	positive regulation of establishment of protein localization	10/258	456/18670	0.102099	0.356241	0.310898	RIPK2/CRH/FGB/FGG/IL26/IL6/OR51E2/POSTN/PTGS2/VSNL1	10
GO:0000302	response to reactive oxygen species	6/258	232/18670	0.103372	0.356241	0.310898	IL6/LCN2/MET/PAX2/S100A7/TRPA1	6
GO:0003206	cardiac chamber morphogenesis	4/258	129/18670	0.103908	0.356241	0.310898	DNAH11/SHOX2/TBX1/TNNT2	4
GO:0032637	interleukin-8 production	3/258	82/18670	0.104694	0.356241	0.310898	APOA2/CHI3L1/CRP	3
GO:0001781	neutrophil apoptotic process	1/258	8/18670	0.105369	0.356241	0.310898	IL6	1
GO:0002016	regulation of blood volume by renin-angiotensin	1/258	8/18670	0.105369	0.356241	0.310898	DRD3	1
GO:0002072	optic cup morphogenesis involved in camera-type eye development	1/258	8/18670	0.105369	0.356241	0.310898	PAX2	1
GO:0003339	regulation of mesenchymal to epithelial transition involved in metanephros morphogenesis	1/258	8/18670	0.105369	0.356241	0.310898	PAX2	1
GO:0006108	malate metabolic process	1/258	8/18670	0.105369	0.356241	0.310898	LIPF	1
GO:0008627	intrinsic apoptotic signaling pathway in response to osmotic stress	1/258	8/18670	0.105369	0.356241	0.310898	PTGS2	1
GO:0009750	response to fructose	1/258	8/18670	0.105369	0.356241	0.310898	PTGS2	1
GO:0010700	negative regulation of norepinephrine secretion	1/258	8/18670	0.105369	0.356241	0.310898	CRH	1
GO:0010966	regulation of phosphate transport	1/258	8/18670	0.105369	0.356241	0.310898	ROS1	1
GO:0014060	regulation of epinephrine secretion	1/258	8/18670	0.105369	0.356241	0.310898	CRH	1
GO:0016078	tRNA catabolic process	1/258	8/18670	0.105369	0.356241	0.310898	SLFN13	1
GO:0030643	cellular phosphate ion homeostasis	1/258	8/18670	0.105369	0.356241	0.310898	SLC34A2	1
GO:0031620	regulation of fever generation	1/258	8/18670	0.105369	0.356241	0.310898	PTGS2	1
GO:0033083	regulation of immature T cell proliferation	1/258	8/18670	0.105369	0.356241	0.310898	RIPK2	1
GO:0035926	chemokine (C-C motif) ligand 2 secretion	1/258	8/18670	0.105369	0.356241	0.310898	POSTN	1
GO:0042420	dopamine catabolic process	1/258	8/18670	0.105369	0.356241	0.310898	SLC6A3	1
GO:0043587	tongue morphogenesis	1/258	8/18670	0.105369	0.356241	0.310898	TBX1	1
GO:0045607	regulation of inner ear auditory receptor cell differentiation	1/258	8/18670	0.105369	0.356241	0.310898	ATOH1	1
GO:0045631	regulation of mechanoreceptor differentiation	1/258	8/18670	0.105369	0.356241	0.310898	ATOH1	1
GO:0048242	epinephrine secretion	1/258	8/18670	0.105369	0.356241	0.310898	CRH	1
GO:0048743	positive regulation of skeletal muscle fiber development	1/258	8/18670	0.105369	0.356241	0.310898	SHOX2	1
GO:0048793	pronephros development	1/258	8/18670	0.105369	0.356241	0.310898	PAX2	1
GO:0051584	regulation of dopamine uptake involved in synaptic transmission	1/258	8/18670	0.105369	0.356241	0.310898	DRD3	1
GO:0051940	regulation of catecholamine uptake involved in synaptic transmission	1/258	8/18670	0.105369	0.356241	0.310898	DRD3	1
GO:0060052	neurofilament cytoskeleton organization	1/258	8/18670	0.105369	0.356241	0.310898	NEFL	1
GO:0060638	mesenchymal-epithelial cell signaling	1/258	8/18670	0.105369	0.356241	0.310898	FGF7	1
GO:0061888	regulation of astrocyte activation	1/258	8/18670	0.105369	0.356241	0.310898	IL6	1
GO:0070943	neutrophil mediated killing of symbiont cell	1/258	8/18670	0.105369	0.356241	0.310898	CXCL6	1
GO:0072161	mesenchymal cell differentiation involved in kidney development	1/258	8/18670	0.105369	0.356241	0.310898	PAX2	1
GO:0072282	metanephric nephron tubule morphogenesis	1/258	8/18670	0.105369	0.356241	0.310898	PAX2	1
GO:0072501	cellular divalent inorganic anion homeostasis	1/258	8/18670	0.105369	0.356241	0.310898	SLC34A2	1
GO:0072502	cellular trivalent inorganic anion homeostasis	1/258	8/18670	0.105369	0.356241	0.310898	SLC34A2	1
GO:0090091	positive regulation of extracellular matrix disassembly	1/258	8/18670	0.105369	0.356241	0.310898	IL6	1
GO:0090269	fibroblast growth factor production	1/258	8/18670	0.105369	0.356241	0.310898	PTGS2	1
GO:0090270	regulation of fibroblast growth factor production	1/258	8/18670	0.105369	0.356241	0.310898	PTGS2	1
GO:1902455	negative regulation of stem cell population maintenance	1/258	8/18670	0.105369	0.356241	0.310898	PAX2	1
GO:2000698	positive regulation of epithelial cell differentiation involved in kidney development	1/258	8/18670	0.105369	0.356241	0.310898	PAX2	1
GO:2000848	positive regulation of corticosteroid hormone secretion	1/258	8/18670	0.105369	0.356241	0.310898	CRH	1
GO:2000980	regulation of inner ear receptor cell differentiation	1/258	8/18670	0.105369	0.356241	0.310898	ATOH1	1
GO:2001012	mesenchymal cell differentiation involved in renal system development	1/258	8/18670	0.105369	0.356241	0.310898	PAX2	1
GO:2001016	positive regulation of skeletal muscle cell differentiation	1/258	8/18670	0.105369	0.356241	0.310898	TBX1	1
GO:2001280	positive regulation of unsaturated fatty acid biosynthetic process	1/258	8/18670	0.105369	0.356241	0.310898	PTGS2	1
GO:0001709	cell fate determination	2/258	40/18670	0.105445	0.356241	0.310898	ATOH1/PAX2	2
GO:0001990	regulation of systemic arterial blood pressure by hormone	2/258	40/18670	0.105445	0.356241	0.310898	DRD3/OR51E2	2
GO:0009395	phospholipid catabolic process	2/258	40/18670	0.105445	0.356241	0.310898	APOA2/PLA2G4F	2
GO:0044058	regulation of digestive system process	2/258	40/18670	0.105445	0.356241	0.310898	APOA2/CRH	2
GO:0051931	regulation of sensory perception	2/258	40/18670	0.105445	0.356241	0.310898	ACPP/CCK	2
GO:0042509	regulation of tyrosine phosphorylation of STAT protein	3/258	83/18670	0.10757	0.362273	0.316163	IL31RA/IL6/TNFSF18	3
GO:0046470	phosphatidylcholine metabolic process	3/258	83/18670	0.10757	0.362273	0.316163	APOA2/CHAT/PLA2G4F	3
GO:0071277	cellular response to calcium ion	3/258	83/18670	0.10757	0.362273	0.316163	ALOX15/CPNE7/NEUROD2	3
GO:0022407	regulation of cell-cell adhesion	9/258	403/18670	0.10778	0.362273	0.316163	ADTRP/ALOX15/RIPK2/CD70/FGB/FGG/IL6/GTPBP4/TESPA1	9
GO:0045785	positive regulation of cell adhesion	9/258	403/18670	0.10778	0.362273	0.316163	ALOX15/RIPK2/CD70/FGB/FGG/IL6/MYOC/TESPA1/TNFSF18	9
GO:0046887	positive regulation of hormone secretion	4/258	131/18670	0.108336	0.363771	0.31747	CRH/FGB/FGG/VSNL1	4
GO:0023061	signal release	10/258	462/18670	0.108724	0.364702	0.318282	CHAT/CRH/FGB/FGG/HNF4A/HNF1A/IL6/MAFA/SLC18A3/VSNL1	10
GO:0071216	cellular response to biotic stimulus	6/258	236/18670	0.109769	0.365981	0.319398	RIPK2/CSF3/CXCL1/CXCL6/IL6/LCN2	6
GO:0071356	cellular response to tumor necrosis factor	7/258	291/18670	0.109807	0.365981	0.319398	CCL18/CCL24/CD70/CHI3L1/LCN2/POSTN/TNFSF18	7
GO:0035136	forelimb morphogenesis	2/258	41/18670	0.109883	0.365981	0.319398	ALX4/SHOX2	2
GO:0090279	regulation of calcium ion import	2/258	41/18670	0.109883	0.365981	0.319398	CRH/SEMG1	2
GO:0150077	regulation of neuroinflammatory response	2/258	41/18670	0.109883	0.365981	0.319398	IL6/PTGS2	2
GO:1900117	regulation of execution phase of apoptosis	2/258	41/18670	0.109883	0.365981	0.319398	CIDEA/IL6	2
GO:1903053	regulation of extracellular matrix organization	2/258	41/18670	0.109883	0.365981	0.319398	ADTRP/IL6	2
GO:0006910	phagocytosis, recognition	3/258	84/18670	0.110477	0.366846	0.320154	IGHG4/IGHM/IGHV4-31	3
GO:0050886	endocrine process	3/258	84/18670	0.110477	0.366846	0.320154	CRH/DRD3/OR51E2	3
GO:0051492	regulation of stress fiber assembly	3/258	84/18670	0.110477	0.366846	0.320154	MET/MIR149/MYOC	3
GO:0071333	cellular response to glucose stimulus	4/258	133/18670	0.112848	0.369006	0.322039	CRH/GJB6/PAX2/VSNL1	4
GO:0009798	axis specification	3/258	85/18670	0.113414	0.369006	0.322039	IRX4/PITX2/SIX3	3
GO:0014031	mesenchymal cell development	3/258	85/18670	0.113414	0.369006	0.322039	PHOX2B/PITX2/TBX1	3
GO:0048864	stem cell development	3/258	85/18670	0.113414	0.369006	0.322039	PHOX2B/PITX2/TBX1	3
GO:0050772	positive regulation of axonogenesis	3/258	85/18670	0.113414	0.369006	0.322039	LPAR3/NEFL/SHOX2	3
GO:0015701	bicarbonate transport	2/258	42/18670	0.11437	0.369006	0.322039	CA3/CA4	2
GO:0032958	inositol phosphate biosynthetic process	2/258	42/18670	0.11437	0.369006	0.322039	MAS1/PLCZ1	2
GO:0051260	protein homooligomerization	8/258	351/18670	0.114743	0.369006	0.322039	ACPP/CALHM1/ITLN1/KCNS1/LCN2/P2RX2/RASEF/TRPA1	8
GO:0032273	positive regulation of protein polymerization	4/258	134/18670	0.115134	0.369006	0.322039	ALOX15/CCL24/CSF3/MET	4
GO:0032355	response to estradiol	4/258	134/18670	0.115134	0.369006	0.322039	CSN1S1/POSTN/PTGS2/SSTR3	4
GO:0046683	response to organophosphorus	4/258	134/18670	0.115134	0.369006	0.322039	AGXT/P2RX2/PTGS2/SLC6A3	4
GO:0007260	tyrosine phosphorylation of STAT protein	3/258	86/18670	0.11638	0.369006	0.322039	IL31RA/IL6/TNFSF18	3
GO:0042446	hormone biosynthetic process	3/258	86/18670	0.11638	0.369006	0.322039	CHAT/CRH/TPO	3
GO:0060291	long-term synaptic potentiation	3/258	86/18670	0.11638	0.369006	0.322039	CRH/NRGN/SCGN	3
GO:0050921	positive regulation of chemotaxis	4/258	135/18670	0.117441	0.369006	0.322039	IL6/MET/NTF3/S100A7	4
GO:0071331	cellular response to hexose stimulus	4/258	135/18670	0.117441	0.369006	0.322039	CRH/GJB6/PAX2/VSNL1	4
GO:0006591	ornithine metabolic process	1/258	9/18670	0.117737	0.369006	0.322039	HNF4A	1
GO:0007614	short-term memory	1/258	9/18670	0.117737	0.369006	0.322039	NPAS4	1
GO:0008300	isoprenoid catabolic process	1/258	9/18670	0.117737	0.369006	0.322039	CYP26A1	1
GO:0010873	positive regulation of cholesterol esterification	1/258	9/18670	0.117737	0.369006	0.322039	APOA2	1
GO:0014012	peripheral nervous system axon regeneration	1/258	9/18670	0.117737	0.369006	0.322039	NEFL	1
GO:0014816	skeletal muscle satellite cell differentiation	1/258	9/18670	0.117737	0.369006	0.322039	PAX7	1
GO:0015824	proline transport	1/258	9/18670	0.117737	0.369006	0.322039	SLC6A7	1
GO:0019614	catechol-containing compound catabolic process	1/258	9/18670	0.117737	0.369006	0.322039	SLC6A3	1
GO:0021603	cranial nerve formation	1/258	9/18670	0.117737	0.369006	0.322039	PAX2	1
GO:0033079	immature T cell proliferation	1/258	9/18670	0.117737	0.369006	0.322039	RIPK2	1
GO:0034144	negative regulation of toll-like receptor 4 signaling pathway	1/258	9/18670	0.117737	0.369006	0.322039	BPIFB1	1
GO:0034382	chylomicron remnant clearance	1/258	9/18670	0.117737	0.369006	0.322039	APOC3	1
GO:0042363	fat-soluble vitamin catabolic process	1/258	9/18670	0.117737	0.369006	0.322039	CYP26A1	1
GO:0042424	catecholamine catabolic process	1/258	9/18670	0.117737	0.369006	0.322039	SLC6A3	1
GO:0042473	outer ear morphogenesis	1/258	9/18670	0.117737	0.369006	0.322039	TBX1	1
GO:0044341	sodium-dependent phosphate transport	1/258	9/18670	0.117737	0.369006	0.322039	SLC34A2	1
GO:0046085	adenosine metabolic process	1/258	9/18670	0.117737	0.369006	0.322039	ACPP	1
GO:0046487	glyoxylate metabolic process	1/258	9/18670	0.117737	0.369006	0.322039	AGXT	1
GO:0048241	epinephrine transport	1/258	9/18670	0.117737	0.369006	0.322039	CRH	1
GO:0048251	elastic fiber assembly	1/258	9/18670	0.117737	0.369006	0.322039	MYH11	1
GO:0048387	negative regulation of retinoic acid receptor signaling pathway	1/258	9/18670	0.117737	0.369006	0.322039	CYP26A1	1
GO:0060502	epithelial cell proliferation involved in lung morphogenesis	1/258	9/18670	0.117737	0.369006	0.322039	FGF7	1
GO:0060693	regulation of branching involved in salivary gland morphogenesis	1/258	9/18670	0.117737	0.369006	0.322039	FGF7	1
GO:0060872	semicircular canal development	1/258	9/18670	0.117737	0.369006	0.322039	TBX1	1
GO:0060982	coronary artery morphogenesis	1/258	9/18670	0.117737	0.369006	0.322039	TBX1	1
GO:0061004	pattern specification involved in kidney development	1/258	9/18670	0.117737	0.369006	0.322039	PAX2	1
GO:0061072	iris morphogenesis	1/258	9/18670	0.117737	0.369006	0.322039	PITX2	1
GO:0061303	cornea development in camera-type eye	1/258	9/18670	0.117737	0.369006	0.322039	KERA	1
GO:0061309	cardiac neural crest cell development involved in outflow tract morphogenesis	1/258	9/18670	0.117737	0.369006	0.322039	PITX2	1
GO:0061549	sympathetic ganglion development	1/258	9/18670	0.117737	0.369006	0.322039	PHOX2B	1
GO:0070092	regulation of glucagon secretion	1/258	9/18670	0.117737	0.369006	0.322039	CRH	1
GO:0071225	cellular response to muramyl dipeptide	1/258	9/18670	0.117737	0.369006	0.322039	RIPK2	1
GO:0071830	triglyceride-rich lipoprotein particle clearance	1/258	9/18670	0.117737	0.369006	0.322039	APOC3	1
GO:0072048	renal system pattern specification	1/258	9/18670	0.117737	0.369006	0.322039	PAX2	1
GO:0072205	metanephric collecting duct development	1/258	9/18670	0.117737	0.369006	0.322039	PAX2	1
GO:0072217	negative regulation of metanephros development	1/258	9/18670	0.117737	0.369006	0.322039	PAX2	1
GO:0090129	positive regulation of synapse maturation	1/258	9/18670	0.117737	0.369006	0.322039	NEUROD2	1
GO:0090281	negative regulation of calcium ion import	1/258	9/18670	0.117737	0.369006	0.322039	SEMG1	1
GO:0098792	xenophagy	1/258	9/18670	0.117737	0.369006	0.322039	RIPK2	1
GO:1904478	regulation of intestinal absorption	1/258	9/18670	0.117737	0.369006	0.322039	APOA2	1
GO:2000288	positive regulation of myoblast proliferation	1/258	9/18670	0.117737	0.369006	0.322039	PAX7	1
GO:2000343	positive regulation of chemokine (C-X-C motif) ligand 2 production	1/258	9/18670	0.117737	0.369006	0.322039	POSTN	1
GO:2000674	regulation of type B pancreatic cell apoptotic process	1/258	9/18670	0.117737	0.369006	0.322039	IL6	1
GO:1903522	regulation of blood circulation	7/258	297/18670	0.118688	0.369846	0.322772	DES/DSG2/FGB/FGG/OR51E2/PTGS2/TNNT2	7
GO:0001953	negative regulation of cell-matrix adhesion	2/258	43/18670	0.118903	0.369846	0.322772	MYOC/POSTN	2
GO:0010863	positive regulation of phospholipase C activity	2/258	43/18670	0.118903	0.369846	0.322772	NTF3/SELE	2
GO:0043616	keratinocyte proliferation	2/258	43/18670	0.118903	0.369846	0.322772	FGF7/KDF1	2
GO:0046461	neutral lipid catabolic process	2/258	43/18670	0.118903	0.369846	0.322772	APOA2/APOC3	2
GO:0046464	acylglycerol catabolic process	2/258	43/18670	0.118903	0.369846	0.322772	APOA2/APOC3	2
GO:0050850	positive regulation of calcium-mediated signaling	2/258	43/18670	0.118903	0.369846	0.322772	NEUROD2/P2RX2	2
GO:0051602	response to electrical stimulus	2/258	43/18670	0.118903	0.369846	0.322772	GJB6/NEUROD2	2
GO:0014068	positive regulation of phosphatidylinositol 3-kinase signaling	3/258	87/18670	0.119375	0.370963	0.323747	CSF3/MYOC/NTF3	3
GO:0071326	cellular response to monosaccharide stimulus	4/258	136/18670	0.119768	0.371835	0.324507	CRH/GJB6/PAX2/VSNL1	4
GO:0002758	innate immune response-activating signal transduction	7/258	298/18670	0.120203	0.372834	0.325379	BPIFB1/RIPK2/FGB/FGG/MARCO/MUC2/SFTPA1	7
GO:0006958	complement activation, classical pathway	4/258	137/18670	0.122115	0.377864	0.329769	CRP/IGHG4/IGHM/IGHV4-31	4
GO:0046425	regulation of JAK-STAT cascade	4/258	137/18670	0.122115	0.377864	0.329769	IL26/IL31RA/IL6/TNFSF18	4
GO:0045921	positive regulation of exocytosis	3/258	88/18670	0.122398	0.377864	0.329769	FGB/FGG/VSNL1	3
GO:0097194	execution phase of apoptosis	3/258	88/18670	0.122398	0.377864	0.329769	CIDEA/DNASE1L3/IL6	3
GO:1904035	regulation of epithelial cell apoptotic process	3/258	88/18670	0.122398	0.377864	0.329769	FGB/FGG/IL6	3
GO:0032965	regulation of collagen biosynthetic process	2/258	44/18670	0.12348	0.380491	0.332062	IL6/MIR149	2
GO:0044060	regulation of endocrine process	2/258	44/18670	0.12348	0.380491	0.332062	CRH/OR51E2	2
GO:0030048	actin filament-based movement	4/258	138/18670	0.124482	0.382831	0.334104	ACTC1/DES/DSG2/TNNT2	4
GO:0070665	positive regulation of leukocyte proliferation	4/258	139/18670	0.126868	0.382831	0.334104	RIPK2/CD70/IL5RA/IL6	4
GO:0006936	muscle contraction	8/258	360/18670	0.127239	0.382831	0.334104	ACTC1/DES/DSG2/MYH11/P2RX2/PTGS2/SMPX/TNNT2	8
GO:0007565	female pregnancy	5/258	192/18670	0.12782	0.382831	0.334104	AMBP/CRH/DSG2/PTGS2/TCF23	5
GO:0031018	endocrine pancreas development	2/258	45/18670	0.1281	0.382831	0.334104	HNF4A/IL6	2
GO:0032309	icosanoid secretion	2/258	45/18670	0.1281	0.382831	0.334104	DRD3/PLA2G4F	2
GO:0032570	response to progesterone	2/258	45/18670	0.1281	0.382831	0.334104	CSN1S1/DSG2	2
GO:0071827	plasma lipoprotein particle organization	2/258	45/18670	0.1281	0.382831	0.334104	APOA2/APOC3	2
GO:0090278	negative regulation of peptide hormone secretion	2/258	45/18670	0.1281	0.382831	0.334104	CRH/VSNL1	2
GO:1900271	regulation of long-term synaptic potentiation	2/258	45/18670	0.1281	0.382831	0.334104	NRGN/SCGN	2
GO:1900274	regulation of phospholipase C activity	2/258	45/18670	0.1281	0.382831	0.334104	NTF3/SELE	2
GO:0009953	dorsal/ventral pattern formation	3/258	90/18670	0.128528	0.382831	0.334104	DBX1/PAX7/SIX3	3
GO:0014033	neural crest cell differentiation	3/258	90/18670	0.128528	0.382831	0.334104	PHOX2B/PITX2/TBX1	3
GO:0015844	monoamine transport	3/258	90/18670	0.128528	0.382831	0.334104	CRH/DRD3/SLC6A3	3
GO:0035023	regulation of Rho protein signal transduction	4/258	140/18670	0.129273	0.382831	0.334104	APOC3/MET/MYOC/PLEKHG4B	4
GO:0060326	cell chemotaxis	7/258	304/18670	0.129505	0.382831	0.334104	CCL18/CCL24/CXCL1/CXCL6/IL6/MET/S100A7	7
GO:1901654	response to ketone	5/258	193/18670	0.129839	0.382831	0.334104	CRH/CSN1S1/DSG2/NEFL/NPAS4	5
GO:0001660	fever generation	1/258	10/18670	0.129935	0.382831	0.334104	PTGS2	1
GO:0001820	serotonin secretion	1/258	10/18670	0.129935	0.382831	0.334104	CRH	1
GO:0002934	desmosome organization	1/258	10/18670	0.129935	0.382831	0.334104	DSG2	1
GO:0007191	adenylate cyclase-activating dopamine receptor signaling pathway	1/258	10/18670	0.129935	0.382831	0.334104	DRD3	1
GO:0008343	adult feeding behavior	1/258	10/18670	0.129935	0.382831	0.334104	DMBX1	1
GO:0014049	positive regulation of glutamate secretion	1/258	10/18670	0.129935	0.382831	0.334104	CCK	1
GO:0019062	virion attachment to host cell	1/258	10/18670	0.129935	0.382831	0.334104	CLEC4M	1
GO:0021562	vestibulocochlear nerve development	1/258	10/18670	0.129935	0.382831	0.334104	PAX2	1
GO:0021877	forebrain neuron fate commitment	1/258	10/18670	0.129935	0.382831	0.334104	TBR1	1
GO:0030432	peristalsis	1/258	10/18670	0.129935	0.382831	0.334104	P2RX2	1
GO:0031284	positive regulation of guanylate cyclase activity	1/258	10/18670	0.129935	0.382831	0.334104	GUCA1C	1
GO:0032275	luteinizing hormone secretion	1/258	10/18670	0.129935	0.382831	0.334104	CRH	1
GO:0034447	very-low-density lipoprotein particle clearance	1/258	10/18670	0.129935	0.382831	0.334104	APOC3	1
GO:0035672	oligopeptide transmembrane transport	1/258	10/18670	0.129935	0.382831	0.334104	SLC15A1	1
GO:0035878	nail development	1/258	10/18670	0.129935	0.382831	0.334104	KRT84	1
GO:0042758	long-chain fatty acid catabolic process	1/258	10/18670	0.129935	0.382831	0.334104	ADTRP	1
GO:0045625	regulation of T-helper 1 cell differentiation	1/258	10/18670	0.129935	0.382831	0.334104	RIPK2	1
GO:0048703	embryonic viscerocranium morphogenesis	1/258	10/18670	0.129935	0.382831	0.334104	TBX1	1
GO:0048755	branching morphogenesis of a nerve	1/258	10/18670	0.129935	0.382831	0.334104	SHOX2	1
GO:0060287	epithelial cilium movement involved in determination of left/right asymmetry	1/258	10/18670	0.129935	0.382831	0.334104	DNAH11	1
GO:0060456	positive regulation of digestive system process	1/258	10/18670	0.129935	0.382831	0.334104	CRH	1
GO:0070391	response to lipoteichoic acid	1/258	10/18670	0.129935	0.382831	0.334104	RIPK2	1
GO:0071223	cellular response to lipoteichoic acid	1/258	10/18670	0.129935	0.382831	0.334104	RIPK2	1
GO:0090336	positive regulation of brown fat cell differentiation	1/258	10/18670	0.129935	0.382831	0.334104	PTGS2	1
GO:0097050	type B pancreatic cell apoptotic process	1/258	10/18670	0.129935	0.382831	0.334104	IL6	1
GO:0106049	regulation of cellular response to osmotic stress	1/258	10/18670	0.129935	0.382831	0.334104	PTGS2	1
GO:0140052	cellular response to oxidised low-density lipoprotein particle stimulus	1/258	10/18670	0.129935	0.382831	0.334104	ADTRP	1
GO:1902033	regulation of hematopoietic stem cell proliferation	1/258	10/18670	0.129935	0.382831	0.334104	THPO	1
GO:2000252	negative regulation of feeding behavior	1/258	10/18670	0.129935	0.382831	0.334104	CCK	1
GO:2000425	regulation of apoptotic cell clearance	1/258	10/18670	0.129935	0.382831	0.334104	ALOX15	1
GO:2000833	positive regulation of steroid hormone secretion	1/258	10/18670	0.129935	0.382831	0.334104	CRH	1
GO:2000849	regulation of glucocorticoid secretion	1/258	10/18670	0.129935	0.382831	0.334104	CRH	1
GO:0001654	eye development	8/258	362/18670	0.130109	0.383001	0.334253	CPAMD8/KERA/MAB21L2/PAX2/PITX2/PRPH2/RHO/SIX3	8
GO:0001504	neurotransmitter uptake	2/258	46/18670	0.132759	0.389065	0.339545	DRD3/SLC6A3	2
GO:0032369	negative regulation of lipid transport	2/258	46/18670	0.132759	0.389065	0.339545	APOA2/APOC3	2
GO:0043277	apoptotic cell clearance	2/258	46/18670	0.132759	0.389065	0.339545	ALOX15/MARCO	2
GO:0045776	negative regulation of blood pressure	2/258	46/18670	0.132759	0.389065	0.339545	CRH/DRD3	2
GO:1904036	negative regulation of epithelial cell apoptotic process	2/258	46/18670	0.132759	0.389065	0.339545	FGB/FGG	2
GO:0071383	cellular response to steroid hormone stimulus	6/258	250/18670	0.1337	0.391406	0.341588	ADTRP/CRH/HNF4A/NPAS4/OR51E2/SSTR3	6
GO:0070838	divalent metal ion transport	10/258	483/18670	0.133796	0.391406	0.341588	CALHM1/CLCA1/CRH/LPAR3/MCOLN3/P2RX2/PLCZ1/PTGS2/SEMG1/TRPA1	10
GO:0050871	positive regulation of B cell activation	4/258	142/18670	0.13414	0.392066	0.342163	IGHG4/IGHM/IGHV4-31/IL6	4
GO:0045833	negative regulation of lipid metabolic process	3/258	92/18670	0.134766	0.393544	0.343453	APOA2/APOC3/CIDEA	3
GO:0150063	visual system development	8/258	366/18670	0.135949	0.393961	0.343817	CPAMD8/KERA/MAB21L2/PAX2/PITX2/PRPH2/RHO/SIX3	8
GO:0001763	morphogenesis of a branching structure	5/258	196/18670	0.135981	0.393961	0.343817	ADAMTS16/FGF7/MET/PAX2/SHOX2	5
GO:0002685	regulation of leukocyte migration	5/258	196/18670	0.135981	0.393961	0.343817	ADTRP/CCL24/IL6/S100A7/TNFSF18	5
GO:0010799	regulation of peptidyl-threonine phosphorylation	2/258	47/18670	0.137457	0.393961	0.343817	RIPK2/CHI3L1	2
GO:0014911	positive regulation of smooth muscle cell migration	2/258	47/18670	0.137457	0.393961	0.343817	POSTN/CCN4	2
GO:0060351	cartilage development involved in endochondral bone morphogenesis	2/258	47/18670	0.137457	0.393961	0.343817	COL2A1/SHOX2	2
GO:0033273	response to vitamin	3/258	93/18670	0.137923	0.393961	0.343817	CYP26A1/POSTN/PTGS2	3
GO:0072080	nephron tubule development	3/258	93/18670	0.137923	0.393961	0.343817	ADAMTS16/PAX2/UMOD	3
GO:0060041	retina development in camera-type eye	4/258	144/18670	0.139081	0.393961	0.343817	PAX2/PRPH2/RHO/SIX3	4
GO:0071322	cellular response to carbohydrate stimulus	4/258	144/18670	0.139081	0.393961	0.343817	CRH/GJB6/PAX2/VSNL1	4
GO:0002283	neutrophil activation involved in immune response	10/258	488/18670	0.140188	0.393961	0.343817	ACPP/CHI3L1/CXCL1/DNASE1L3/HSPA6/KRT1/LCN2/PRTN3/PTPRB/S100A7	10
GO:0072511	divalent inorganic cation transport	10/258	489/18670	0.141485	0.393961	0.343817	CALHM1/CLCA1/CRH/LPAR3/MCOLN3/P2RX2/PLCZ1/PTGS2/SEMG1/TRPA1	10
GO:0001976	neurological system process involved in regulation of systemic arterial blood pressure	1/258	11/18670	0.141965	0.393961	0.343817	P2RX2	1
GO:0003356	regulation of cilium beat frequency	1/258	11/18670	0.141965	0.393961	0.343817	DNAH11	1
GO:0006857	oligopeptide transport	1/258	11/18670	0.141965	0.393961	0.343817	SLC15A1	1
GO:0007195	adenylate cyclase-inhibiting dopamine receptor signaling pathway	1/258	11/18670	0.141965	0.393961	0.343817	DRD3	1
GO:0007256	activation of JNKK activity	1/258	11/18670	0.141965	0.393961	0.343817	RIPK2	1
GO:0010172	embryonic body morphogenesis	1/258	11/18670	0.141965	0.393961	0.343817	MAB21L2	1
GO:0019371	cyclooxygenase pathway	1/258	11/18670	0.141965	0.393961	0.343817	PTGS2	1
GO:0019532	oxalate transport	1/258	11/18670	0.141965	0.393961	0.343817	AGXT	1
GO:0021521	ventral spinal cord interneuron specification	1/258	11/18670	0.141965	0.393961	0.343817	DBX1	1
GO:0021604	cranial nerve structural organization	1/258	11/18670	0.141965	0.393961	0.343817	PAX2	1
GO:0030241	skeletal muscle myosin thick filament assembly	1/258	11/18670	0.141965	0.393961	0.343817	MYH11	1
GO:0031652	positive regulation of heat generation	1/258	11/18670	0.141965	0.393961	0.343817	PTGS2	1
GO:0031987	locomotion involved in locomotory behavior	1/258	11/18670	0.141965	0.393961	0.343817	DRD3	1
GO:0032060	bleb assembly	1/258	11/18670	0.141965	0.393961	0.343817	LPAR3	1
GO:0032276	regulation of gonadotropin secretion	1/258	11/18670	0.141965	0.393961	0.343817	CRH	1
GO:0033089	positive regulation of T cell differentiation in thymus	1/258	11/18670	0.141965	0.393961	0.343817	TESPA1	1
GO:0034379	very-low-density lipoprotein particle assembly	1/258	11/18670	0.141965	0.393961	0.343817	APOC3	1
GO:0034776	response to histamine	1/258	11/18670	0.141965	0.393961	0.343817	DRD3	1
GO:0035933	glucocorticoid secretion	1/258	11/18670	0.141965	0.393961	0.343817	CRH	1
GO:0043129	surfactant homeostasis	1/258	11/18670	0.141965	0.393961	0.343817	SFTPA1	1
GO:0045217	cell-cell junction maintenance	1/258	11/18670	0.141965	0.393961	0.343817	PRTN3	1
GO:0045919	positive regulation of cytolysis	1/258	11/18670	0.141965	0.393961	0.343817	CFHR5	1
GO:0046185	aldehyde catabolic process	1/258	11/18670	0.141965	0.393961	0.343817	AGXT	1
GO:0046439	L-cysteine metabolic process	1/258	11/18670	0.141965	0.393961	0.343817	AGXT	1
GO:0048672	positive regulation of collateral sprouting	1/258	11/18670	0.141965	0.393961	0.343817	LPAR3	1
GO:0048742	regulation of skeletal muscle fiber development	1/258	11/18670	0.141965	0.393961	0.343817	SHOX2	1
GO:0051024	positive regulation of immunoglobulin secretion	1/258	11/18670	0.141965	0.393961	0.343817	IL6	1
GO:0051583	dopamine uptake involved in synaptic transmission	1/258	11/18670	0.141965	0.393961	0.343817	DRD3	1
GO:0051934	catecholamine uptake involved in synaptic transmission	1/258	11/18670	0.141965	0.393961	0.343817	DRD3	1
GO:0055091	phospholipid homeostasis	1/258	11/18670	0.141965	0.393961	0.343817	HNF4A	1
GO:0060088	auditory receptor cell stereocilium organization	1/258	11/18670	0.141965	0.393961	0.343817	CLRN1	1
GO:0060159	regulation of dopamine receptor signaling pathway	1/258	11/18670	0.141965	0.393961	0.343817	DRD3	1
GO:0060174	limb bud formation	1/258	11/18670	0.141965	0.393961	0.343817	COL2A1	1
GO:0060573	cell fate specification involved in pattern specification	1/258	11/18670	0.141965	0.393961	0.343817	DBX1	1
GO:0061307	cardiac neural crest cell differentiation involved in heart development	1/258	11/18670	0.141965	0.393961	0.343817	PITX2	1
GO:0061308	cardiac neural crest cell development involved in heart development	1/258	11/18670	0.141965	0.393961	0.343817	PITX2	1
GO:0070278	extracellular matrix constituent secretion	1/258	11/18670	0.141965	0.393961	0.343817	ADTRP	1
GO:0070673	response to interleukin-18	1/258	11/18670	0.141965	0.393961	0.343817	RIPK2	1
GO:0071688	striated muscle myosin thick filament assembly	1/258	11/18670	0.141965	0.393961	0.343817	MYH11	1
GO:0072070	loop of Henle development	1/258	11/18670	0.141965	0.393961	0.343817	UMOD	1
GO:0072173	metanephric tubule morphogenesis	1/258	11/18670	0.141965	0.393961	0.343817	PAX2	1
GO:0090193	positive regulation of glomerulus development	1/258	11/18670	0.141965	0.393961	0.343817	PAX2	1
GO:0099149	regulation of postsynaptic neurotransmitter receptor internalization	1/258	11/18670	0.141965	0.393961	0.343817	DRD3	1
GO:1901678	iron coordination entity transport	1/258	11/18670	0.141965	0.393961	0.343817	LCN2	1
GO:1904468	negative regulation of tumor necrosis factor secretion	1/258	11/18670	0.141965	0.393961	0.343817	MIR149	1
GO:1990440	positive regulation of transcription from RNA polymerase II promoter in response to endoplasmic reticulum stress	1/258	11/18670	0.141965	0.393961	0.343817	CREB3L3	1
GO:2000551	regulation of T-helper 2 cell cytokine production	1/258	11/18670	0.141965	0.393961	0.343817	IL6	1
GO:0060324	face development	2/258	48/18670	0.14219	0.394255	0.344074	HOXB3/TBX1	2
GO:0006644	phospholipid metabolic process	9/258	430/18670	0.14294	0.395999	0.345596	ALOX15/APOA2/CHAT/CPNE7/CWH43/FADS1/LGALS13/PLA2G4F/PLPPR2	9
GO:0055123	digestive system development	4/258	146/18670	0.144095	0.398127	0.347453	ALX4/BARX1/SFRP5/SHOX2	4
GO:0042102	positive regulation of T cell proliferation	3/258	95/18670	0.144312	0.398127	0.347453	RIPK2/CD70/IL6	3
GO:0051952	regulation of amine transport	3/258	95/18670	0.144312	0.398127	0.347453	CCK/CRH/DRD3	3
GO:0061326	renal tubule development	3/258	95/18670	0.144312	0.398127	0.347453	ADAMTS16/PAX2/UMOD	3
GO:0110020	regulation of actomyosin structure organization	3/258	95/18670	0.144312	0.398127	0.347453	MET/MIR149/MYOC	3
GO:0007187	G protein-coupled receptor signaling pathway, coupled to cyclic nucleotide second messenger	6/258	256/18670	0.144658	0.398747	0.347994	DRD3/LPAR3/MARCO/OR6T1/RXFP1/SSTR3	6
GO:0043010	camera-type eye development	7/258	314/18670	0.145783	0.400918	0.349889	KERA/MAB21L2/PAX2/PITX2/PRPH2/RHO/SIX3	7
GO:0051098	regulation of binding	8/258	373/18670	0.146483	0.400918	0.349889	RIPK2/CFHR5/CSF3/MET/GTPBP4/PAX7/WFIKKN2/XIRP1	8
GO:0003044	regulation of systemic arterial blood pressure mediated by a chemical signal	2/258	49/18670	0.146958	0.400918	0.349889	DRD3/OR51E2	2
GO:0003254	regulation of membrane depolarization	2/258	49/18670	0.146958	0.400918	0.349889	CCK/MYOC	2
GO:0010712	regulation of collagen metabolic process	2/258	49/18670	0.146958	0.400918	0.349889	IL6/MIR149	2
GO:0048546	digestive tract morphogenesis	2/258	49/18670	0.146958	0.400918	0.349889	SFRP5/SHOX2	2
GO:0071715	icosanoid transport	2/258	49/18670	0.146958	0.400918	0.349889	DRD3/PLA2G4F	2
GO:0071825	protein-lipid complex subunit organization	2/258	49/18670	0.146958	0.400918	0.349889	APOA2/APOC3	2
GO:1901571	fatty acid derivative transport	2/258	49/18670	0.146958	0.400918	0.349889	DRD3/PLA2G4F	2
GO:0042632	cholesterol homeostasis	3/258	96/18670	0.147543	0.400918	0.349889	APOA2/APOC3/HNF4A	3
GO:0051494	negative regulation of cytoskeleton organization	4/258	148/18670	0.149178	0.400918	0.349889	ESPN/MET/MIR149/MYOC	4
GO:0007044	cell-substrate junction assembly	3/258	97/18670	0.150797	0.400918	0.349889	KRT14/KRT5/MYOC	3
GO:0032231	regulation of actin filament bundle assembly	3/258	97/18670	0.150797	0.400918	0.349889	MET/MIR149/MYOC	3
GO:0055092	sterol homeostasis	3/258	97/18670	0.150797	0.400918	0.349889	APOA2/APOC3/HNF4A	3
GO:0050804	modulation of chemical synaptic transmission	9/258	436/18670	0.151467	0.400918	0.349889	CRH/DRD3/NEUROD2/NPAS4/NPS/NRGN/NTF3/PTGS2/SCGN	9
GO:0014074	response to purine-containing compound	4/258	149/18670	0.151746	0.400918	0.349889	AGXT/P2RX2/PTGS2/SLC6A3	4
GO:0010171	body morphogenesis	2/258	50/18670	0.151759	0.400918	0.349889	MAB21L2/TBX1	2
GO:0008654	phospholipid biosynthetic process	6/258	260/18670	0.152185	0.400918	0.349889	ALOX15/APOA2/CHAT/CPNE7/CWH43/FADS1	6
GO:0060249	anatomical structure homeostasis	9/258	437/18670	0.152913	0.400918	0.349889	CLRN1/COL2A1/IL6/KRT1/LCN1/MUC2/RHO/SCGN/SFTPA1	9
GO:0099177	regulation of trans-synaptic signaling	9/258	437/18670	0.152913	0.400918	0.349889	CRH/DRD3/NEUROD2/NPAS4/NPS/NRGN/NTF3/PTGS2/SCGN	9
GO:1902905	positive regulation of supramolecular fiber organization	5/258	204/18670	0.152974	0.400918	0.349889	ALOX15/CCL24/CSF3/MET/MYOC	5
GO:0003161	cardiac conduction system development	1/258	12/18670	0.153829	0.400918	0.349889	DSG2	1
GO:0003334	keratinocyte development	1/258	12/18670	0.153829	0.400918	0.349889	KDF1	1
GO:0003337	mesenchymal to epithelial transition involved in metanephros morphogenesis	1/258	12/18670	0.153829	0.400918	0.349889	PAX2	1
GO:0006068	ethanol catabolic process	1/258	12/18670	0.153829	0.400918	0.349889	SULT2A1	1
GO:0007320	insemination	1/258	12/18670	0.153829	0.400918	0.349889	SEMG1	1
GO:0009111	vitamin catabolic process	1/258	12/18670	0.153829	0.400918	0.349889	CYP26A1	1
GO:0010623	programmed cell death involved in cell development	1/258	12/18670	0.153829	0.400918	0.349889	DNASE1L3	1
GO:0010889	regulation of sequestering of triglyceride	1/258	12/18670	0.153829	0.400918	0.349889	CIDEA	1
GO:0010896	regulation of triglyceride catabolic process	1/258	12/18670	0.153829	0.400918	0.349889	APOC3	1
GO:0015867	ATP transport	1/258	12/18670	0.153829	0.400918	0.349889	CALHM1	1
GO:0019336	phenol-containing compound catabolic process	1/258	12/18670	0.153829	0.400918	0.349889	SLC6A3	1
GO:0030002	cellular anion homeostasis	1/258	12/18670	0.153829	0.400918	0.349889	SLC34A2	1
GO:0030320	cellular monovalent inorganic anion homeostasis	1/258	12/18670	0.153829	0.400918	0.349889	SLC34A2	1
GO:0031034	myosin filament assembly	1/258	12/18670	0.153829	0.400918	0.349889	MYH11	1
GO:0031282	regulation of guanylate cyclase activity	1/258	12/18670	0.153829	0.400918	0.349889	GUCA1C	1
GO:0031392	regulation of prostaglandin biosynthetic process	1/258	12/18670	0.153829	0.400918	0.349889	PTGS2	1
GO:0032230	positive regulation of synaptic transmission, GABAergic	1/258	12/18670	0.153829	0.400918	0.349889	NPS	1
GO:0038003	opioid receptor signaling pathway	1/258	12/18670	0.153829	0.400918	0.349889	NPBWR2	1
GO:0038180	nerve growth factor signaling pathway	1/258	12/18670	0.153829	0.400918	0.349889	NTF3	1
GO:0042340	keratan sulfate catabolic process	1/258	12/18670	0.153829	0.400918	0.349889	KERA	1
GO:0042416	dopamine biosynthetic process	1/258	12/18670	0.153829	0.400918	0.349889	SLC6A3	1
GO:0044650	adhesion of symbiont to host cell	1/258	12/18670	0.153829	0.400918	0.349889	CLEC4M	1
GO:0045161	neuronal ion channel clustering	1/258	12/18670	0.153829	0.400918	0.349889	MYOC	1
GO:0045416	positive regulation of interleukin-8 biosynthetic process	1/258	12/18670	0.153829	0.400918	0.349889	APOA2	1
GO:0045472	response to ether	1/258	12/18670	0.153829	0.400918	0.349889	CRH	1
GO:0045760	positive regulation of action potential	1/258	12/18670	0.153829	0.400918	0.349889	NPS	1
GO:0048484	enteric nervous system development	1/258	12/18670	0.153829	0.400918	0.349889	PHOX2B	1
GO:0051549	positive regulation of keratinocyte migration	1/258	12/18670	0.153829	0.400918	0.349889	FGF7	1
GO:0051798	positive regulation of hair follicle development	1/258	12/18670	0.153829	0.400918	0.349889	KRT17	1
GO:0051873	killing by host of symbiont cells	1/258	12/18670	0.153829	0.400918	0.349889	CXCL6	1
GO:0055062	phosphate ion homeostasis	1/258	12/18670	0.153829	0.400918	0.349889	SLC34A2	1
GO:0060900	embryonic camera-type eye formation	1/258	12/18670	0.153829	0.400918	0.349889	PAX2	1
GO:0070493	thrombin-activated receptor signaling pathway	1/258	12/18670	0.153829	0.400918	0.349889	MET	1
GO:0071257	cellular response to electrical stimulus	1/258	12/18670	0.153829	0.400918	0.349889	NEUROD2	1
GO:0072178	nephric duct morphogenesis	1/258	12/18670	0.153829	0.400918	0.349889	PAX2	1
GO:0072505	divalent inorganic anion homeostasis	1/258	12/18670	0.153829	0.400918	0.349889	SLC34A2	1
GO:0072506	trivalent inorganic anion homeostasis	1/258	12/18670	0.153829	0.400918	0.349889	SLC34A2	1
GO:0072540	T-helper 17 cell lineage commitment	1/258	12/18670	0.153829	0.400918	0.349889	IL6	1
GO:0090209	negative regulation of triglyceride metabolic process	1/258	12/18670	0.153829	0.400918	0.349889	APOC3	1
GO:0090331	negative regulation of platelet aggregation	1/258	12/18670	0.153829	0.400918	0.349889	FGG	1
GO:1901298	regulation of hydrogen peroxide-mediated programmed cell death	1/258	12/18670	0.153829	0.400918	0.349889	MET	1
GO:1902337	regulation of apoptotic process involved in morphogenesis	1/258	12/18670	0.153829	0.400918	0.349889	PAX2	1
GO:1904424	regulation of GTP binding	1/258	12/18670	0.153829	0.400918	0.349889	MET	1
GO:1904862	inhibitory synapse assembly	1/258	12/18670	0.153829	0.400918	0.349889	NPAS4	1
GO:2000341	regulation of chemokine (C-X-C motif) ligand 2 production	1/258	12/18670	0.153829	0.400918	0.349889	POSTN	1
GO:2000650	negative regulation of sodium ion transmembrane transporter activity	1/258	12/18670	0.153829	0.400918	0.349889	DRD3	1
GO:0030038	contractile actin filament bundle assembly	3/258	98/18670	0.154075	0.400918	0.349889	MET/MIR149/MYOC	3
GO:0043149	stress fiber assembly	3/258	98/18670	0.154075	0.400918	0.349889	MET/MIR149/MYOC	3
GO:0110053	regulation of actin filament organization	6/258	261/18670	0.154094	0.400918	0.349889	ALOX15/CCL24/CSF3/MET/MIR149/MYOC	6
GO:0002218	activation of innate immune response	7/258	319/18670	0.154272	0.400918	0.349889	BPIFB1/RIPK2/FGB/FGG/MARCO/MUC2/SFTPA1	7
GO:0002455	humoral immune response mediated by circulating immunoglobulin	4/258	150/18670	0.15433	0.400918	0.349889	CRP/IGHG4/IGHM/IGHV4-31	4
GO:0007338	single fertilization	4/258	150/18670	0.15433	0.400918	0.349889	LYZL6/PLCZ1/SERPINA5/TEX101	4
GO:0097164	ammonium ion metabolic process	5/258	205/18670	0.155159	0.402752	0.351489	APOA2/CHAT/DRD3/PLA2G4F/SLC6A3	5
GO:0019932	second-messenger-mediated signaling	9/258	439/18670	0.155824	0.404162	0.35272	CALML3/CRH/DRD3/MAFA/NEUROD2/OR51E2/P2RX2/RXFP1/SELE	9
GO:0019369	arachidonic acid metabolic process	2/258	51/18670	0.15659	0.404554	0.353062	ALOX15/PTGS2	2
GO:0043949	regulation of cAMP-mediated signaling	2/258	51/18670	0.15659	0.404554	0.353062	CRH/OR51E2	2
GO:0048260	positive regulation of receptor-mediated endocytosis	2/258	51/18670	0.15659	0.404554	0.353062	NTF3/SELE	2
GO:0048641	regulation of skeletal muscle tissue development	2/258	51/18670	0.15659	0.404554	0.353062	SHOX2/TBX1	2
GO:0090102	cochlea development	2/258	51/18670	0.15659	0.404554	0.353062	PAX2/TBX1	2
GO:0030838	positive regulation of actin filament polymerization	3/258	99/18670	0.157374	0.406262	0.354553	ALOX15/CCL24/CSF3	3
GO:0007568	aging	7/258	321/18670	0.15773	0.406863	0.355077	GJB6/KRT14/KRT16/KRT33B/PAX2/PTGS2/SLC6A3	7
GO:0001678	cellular glucose homeostasis	4/258	152/18670	0.159548	0.409658	0.357516	CRH/GJB6/PAX2/VSNL1	4
GO:0030073	insulin secretion	5/258	207/18670	0.159566	0.409658	0.357516	CRH/HNF4A/HNF1A/MAFA/VSNL1	5
GO:2001023	regulation of response to drug	3/258	100/18670	0.160696	0.409658	0.357516	CRH/DRD3/MET	3
GO:0015872	dopamine transport	2/258	52/18670	0.161449	0.409658	0.357516	DRD3/SLC6A3	2
GO:0032330	regulation of chondrocyte differentiation	2/258	52/18670	0.161449	0.409658	0.357516	SHOX2/CCN4	2
GO:0046580	negative regulation of Ras protein signal transduction	2/258	52/18670	0.161449	0.409658	0.357516	MET/MYOC	2
GO:0050885	neuromuscular process controlling balance	2/258	52/18670	0.161449	0.409658	0.357516	CLRN1/NEFL	2
GO:0090276	regulation of peptide hormone secretion	5/258	208/18670	0.161789	0.409658	0.357516	CRH/FGB/FGG/HNF4A/VSNL1	5
GO:0030168	platelet activation	4/258	153/18670	0.162182	0.409658	0.357516	CSRP1/FGB/FGG/IL6	4
GO:0042133	neurotransmitter metabolic process	4/258	153/18670	0.162182	0.409658	0.357516	AGXT/CHAT/PTGS2/SLC6A3	4
GO:0045807	positive regulation of endocytosis	4/258	153/18670	0.162182	0.409658	0.357516	APOA2/NTF3/SELE/SFTPA1	4
GO:0051017	actin filament bundle assembly	4/258	153/18670	0.162182	0.409658	0.357516	ESPN/MET/MIR149/MYOC	4
GO:0006631	fatty acid metabolic process	8/258	383/18670	0.162204	0.409658	0.357516	ADTRP/ALOX15/APOC3/FADS1/FADS6/GSTA1/PLA2G4F/PTGS2	8
GO:0007631	feeding behavior	3/258	101/18670	0.164038	0.409658	0.357516	CCK/DMBX1/TBR1	3
GO:0031532	actin cytoskeleton reorganization	3/258	101/18670	0.164038	0.409658	0.357516	CSF3/FGF7/NTF3	3
GO:0048661	positive regulation of smooth muscle cell proliferation	3/258	101/18670	0.164038	0.409658	0.357516	IL6/PTGS2/CCN4	3
GO:0001867	complement activation, lectin pathway	1/258	13/18670	0.165529	0.409658	0.357516	KRT1	1
GO:0001886	endothelial cell morphogenesis	1/258	13/18670	0.165529	0.409658	0.357516	MET	1
GO:0001973	adenosine receptor signaling pathway	1/258	13/18670	0.165529	0.409658	0.357516	ACPP	1
GO:0002087	regulation of respiratory gaseous exchange by neurological system process	1/258	13/18670	0.165529	0.409658	0.357516	PHOX2B	1
GO:0002093	auditory receptor cell morphogenesis	1/258	13/18670	0.165529	0.409658	0.357516	CLRN1	1
GO:0006707	cholesterol catabolic process	1/258	13/18670	0.165529	0.409658	0.357516	AKR1D1	1
GO:0010745	negative regulation of macrophage derived foam cell differentiation	1/258	13/18670	0.165529	0.409658	0.357516	CRP	1
GO:0010838	positive regulation of keratinocyte proliferation	1/258	13/18670	0.165529	0.409658	0.357516	FGF7	1
GO:0010839	negative regulation of keratinocyte proliferation	1/258	13/18670	0.165529	0.409658	0.357516	KDF1	1
GO:0010872	regulation of cholesterol esterification	1/258	13/18670	0.165529	0.409658	0.357516	APOA2	1
GO:0016127	sterol catabolic process	1/258	13/18670	0.165529	0.409658	0.357516	AKR1D1	1
GO:0018206	peptidyl-methionine modification	1/258	13/18670	0.165529	0.409658	0.357516	APOA2	1
GO:0019896	axonal transport of mitochondrion	1/258	13/18670	0.165529	0.409658	0.357516	NEFL	1
GO:0021554	optic nerve development	1/258	13/18670	0.165529	0.409658	0.357516	PAX2	1
GO:0031033	myosin filament organization	1/258	13/18670	0.165529	0.409658	0.357516	MYH11	1
GO:0031650	regulation of heat generation	1/258	13/18670	0.165529	0.409658	0.357516	PTGS2	1
GO:0032096	negative regulation of response to food	1/258	13/18670	0.165529	0.409658	0.357516	CCK	1
GO:0032099	negative regulation of appetite	1/258	13/18670	0.165529	0.409658	0.357516	CCK	1
GO:0032488	Cdc42 protein signal transduction	1/258	13/18670	0.165529	0.409658	0.357516	APOC3	1
GO:0032536	regulation of cell projection size	1/258	13/18670	0.165529	0.409658	0.357516	NEFL	1
GO:0034374	low-density lipoprotein particle remodeling	1/258	13/18670	0.165529	0.409658	0.357516	APOA2	1
GO:0035641	locomotory exploration behavior	1/258	13/18670	0.165529	0.409658	0.357516	CRH	1
GO:0035745	T-helper 2 cell cytokine production	1/258	13/18670	0.165529	0.409658	0.357516	IL6	1
GO:0036109	alpha-linolenic acid metabolic process	1/258	13/18670	0.165529	0.409658	0.357516	FADS1	1
GO:0042635	positive regulation of hair cycle	1/258	13/18670	0.165529	0.409658	0.357516	KRT17	1
GO:0045779	negative regulation of bone resorption	1/258	13/18670	0.165529	0.409658	0.357516	IL6	1
GO:0047484	regulation of response to osmotic stress	1/258	13/18670	0.165529	0.409658	0.357516	PTGS2	1
GO:0048715	negative regulation of oligodendrocyte differentiation	1/258	13/18670	0.165529	0.409658	0.357516	DRD3	1
GO:0048875	chemical homeostasis within a tissue	1/258	13/18670	0.165529	0.409658	0.357516	SFTPA1	1
GO:0050966	detection of mechanical stimulus involved in sensory perception of pain	1/258	13/18670	0.165529	0.409658	0.357516	TRPA1	1
GO:0051386	regulation of neurotrophin TRK receptor signaling pathway	1/258	13/18670	0.165529	0.409658	0.357516	NTF3	1
GO:0070431	nucleotide-binding oligomerization domain containing 2 signaling pathway	1/258	13/18670	0.165529	0.409658	0.357516	RIPK2	1
GO:0070986	left/right axis specification	1/258	13/18670	0.165529	0.409658	0.357516	PITX2	1
GO:0072044	collecting duct development	1/258	13/18670	0.165529	0.409658	0.357516	PAX2	1
GO:0072182	regulation of nephron tubule epithelial cell differentiation	1/258	13/18670	0.165529	0.409658	0.357516	PAX2	1
GO:0072672	neutrophil extravasation	1/258	13/18670	0.165529	0.409658	0.357516	PRTN3	1
GO:1900025	negative regulation of substrate adhesion-dependent cell spreading	1/258	13/18670	0.165529	0.409658	0.357516	POSTN	1
GO:1902306	negative regulation of sodium ion transmembrane transport	1/258	13/18670	0.165529	0.409658	0.357516	DRD3	1
GO:0000387	spliceosomal snRNP assembly	2/258	53/18670	0.166336	0.410114	0.357914	RNU4-1/RNU4-2	2
GO:0006968	cellular defense response	2/258	53/18670	0.166336	0.410114	0.357914	KLRG1/UMOD	2
GO:0032964	collagen biosynthetic process	2/258	53/18670	0.166336	0.410114	0.357914	IL6/MIR149	2
GO:0045214	sarcomere organization	2/258	53/18670	0.166336	0.410114	0.357914	CSRP1/TNNT2	2
GO:0045744	negative regulation of G protein-coupled receptor signaling pathway	2/258	53/18670	0.166336	0.410114	0.357914	DRD3/MET	2
GO:0015837	amine transport	3/258	102/18670	0.167402	0.411815	0.359399	CCK/CRH/DRD3	3
GO:0035335	peptidyl-tyrosine dephosphorylation	3/258	102/18670	0.167402	0.411815	0.359399	PTPRB/PTPRR/PTPRQ	3
GO:0098869	cellular oxidant detoxification	3/258	102/18670	0.167402	0.411815	0.359399	GSTA1/PTGS2/TPO	3
GO:0031334	positive regulation of protein complex assembly	6/258	268/18670	0.16775	0.412364	0.359878	ALOX15/CCK/CCL24/CSF3/HNF1A/MET	6
GO:0007259	JAK-STAT cascade	4/258	156/18670	0.170176	0.417393	0.364267	IL26/IL31RA/IL6/TNFSF18	4
GO:0030856	regulation of epithelial cell differentiation	4/258	156/18670	0.170176	0.417393	0.364267	ATOH1/KDF1/KRT84/PAX2	4
GO:0042129	regulation of T cell proliferation	4/258	156/18670	0.170176	0.417393	0.364267	RIPK2/CD70/IL6/TNFSF18	4
GO:0032970	regulation of actin filament-based process	8/258	388/18670	0.170349	0.417508	0.364367	ALOX15/CCL24/CSF3/DSG2/MET/MIR149/MYOC/NTF3	8
GO:0018958	phenol-containing compound metabolic process	3/258	103/18670	0.170785	0.417847	0.364663	DRD3/SLC6A3/TPO	3
GO:0006584	catecholamine metabolic process	2/258	54/18670	0.171249	0.417847	0.364663	DRD3/SLC6A3	2
GO:0009712	catechol-containing compound metabolic process	2/258	54/18670	0.171249	0.417847	0.364663	DRD3/SLC6A3	2
GO:0021515	cell differentiation in spinal cord	2/258	54/18670	0.171249	0.417847	0.364663	DBX1/PAX7	2
GO:0046164	alcohol catabolic process	2/258	54/18670	0.171249	0.417847	0.364663	AKR1D1/SULT2A1	2
GO:0070206	protein trimerization	2/258	54/18670	0.171249	0.417847	0.364663	ITLN1/LCN2	2
GO:0001764	neuron migration	4/258	157/18670	0.172871	0.418352	0.365104	ATOH1/CCK/GFRA3/PHOX2B	4
GO:0061572	actin filament bundle organization	4/258	157/18670	0.172871	0.418352	0.365104	ESPN/MET/MIR149/MYOC	4
GO:0051235	maintenance of location	7/258	330/18670	0.173727	0.418352	0.365104	CIDEA/CRP/IL6/LCN2/MCOLN3/S100A7/TRPA1	7
GO:1901617	organic hydroxy compound biosynthetic process	6/258	271/18670	0.173754	0.418352	0.365104	ABCB11/AKR1D1/ALOX15/MAS1/PLCZ1/SLC6A3	6
GO:2001237	negative regulation of extrinsic apoptotic signaling pathway	3/258	104/18670	0.174188	0.418352	0.365104	COL2A1/FGB/FGG	3
GO:0015893	drug transport	5/258	214/18670	0.175384	0.418352	0.365104	CALHM1/CRH/DRD3/NGB/SLC6A3	5
GO:0002886	regulation of myeloid leukocyte mediated immunity	2/258	55/18670	0.176185	0.418352	0.365104	CXCL6/DNASE1L3	2
GO:0003229	ventricular cardiac muscle tissue development	2/258	55/18670	0.176185	0.418352	0.365104	DSG2/TNNT2	2
GO:0042304	regulation of fatty acid biosynthetic process	2/258	55/18670	0.176185	0.418352	0.365104	APOC3/PTGS2	2
GO:0043030	regulation of macrophage activation	2/258	55/18670	0.176185	0.418352	0.365104	IL31RA/IL6	2
GO:0044273	sulfur compound catabolic process	2/258	55/18670	0.176185	0.418352	0.365104	AGXT/KERA	2
GO:0098900	regulation of action potential	2/258	55/18670	0.176185	0.418352	0.365104	DSG2/NPS	2
GO:0000463	maturation of LSU-rRNA from tricistronic rRNA transcript (SSU-rRNA, 5.8S rRNA, LSU-rRNA)	1/258	14/18670	0.177069	0.418352	0.365104	GTPBP4	1
GO:0002523	leukocyte migration involved in inflammatory response	1/258	14/18670	0.177069	0.418352	0.365104	SELE	1
GO:0007501	mesodermal cell fate specification	1/258	14/18670	0.177069	0.418352	0.365104	PAX2	1
GO:0009071	serine family amino acid catabolic process	1/258	14/18670	0.177069	0.418352	0.365104	AGXT	1
GO:0010421	hydrogen peroxide-mediated programmed cell death	1/258	14/18670	0.177069	0.418352	0.365104	MET	1
GO:0010989	negative regulation of low-density lipoprotein particle clearance	1/258	14/18670	0.177069	0.418352	0.365104	APOC3	1
GO:0021527	spinal cord association neuron differentiation	1/258	14/18670	0.177069	0.418352	0.365104	PAX7	1
GO:0021535	cell migration in hindbrain	1/258	14/18670	0.177069	0.418352	0.365104	PHOX2B	1
GO:0030240	skeletal muscle thin filament assembly	1/258	14/18670	0.177069	0.418352	0.365104	ACTC1	1
GO:0034331	cell junction maintenance	1/258	14/18670	0.177069	0.418352	0.365104	PRTN3	1
GO:0034356	NAD biosynthesis via nicotinamide riboside salvage pathway	1/258	14/18670	0.177069	0.418352	0.365104	PTGS2	1
GO:0035358	regulation of peroxisome proliferator activated receptor signaling pathway	1/258	14/18670	0.177069	0.418352	0.365104	ALOX15	1
GO:0035815	positive regulation of renal sodium excretion	1/258	14/18670	0.177069	0.418352	0.365104	DRD3	1
GO:0038166	angiotensin-activated signaling pathway	1/258	14/18670	0.177069	0.418352	0.365104	MAS1	1
GO:0048266	behavioral response to pain	1/258	14/18670	0.177069	0.418352	0.365104	P2RX2	1
GO:0050862	positive regulation of T cell receptor signaling pathway	1/258	14/18670	0.177069	0.418352	0.365104	TESPA1	1
GO:0050930	induction of positive chemotaxis	1/258	14/18670	0.177069	0.418352	0.365104	NTF3	1
GO:0051547	regulation of keratinocyte migration	1/258	14/18670	0.177069	0.418352	0.365104	FGF7	1
GO:0051852	disruption by host of symbiont cells	1/258	14/18670	0.177069	0.418352	0.365104	CXCL6	1
GO:0051917	regulation of fibrinolysis	1/258	14/18670	0.177069	0.418352	0.365104	KLKB1	1
GO:0060732	positive regulation of inositol phosphate biosynthetic process	1/258	14/18670	0.177069	0.418352	0.365104	MAS1	1
GO:0070234	positive regulation of T cell apoptotic process	1/258	14/18670	0.177069	0.418352	0.365104	LGALS13	1
GO:0072216	positive regulation of metanephros development	1/258	14/18670	0.177069	0.418352	0.365104	PAX2	1
GO:0072567	chemokine (C-X-C motif) ligand 2 production	1/258	14/18670	0.177069	0.418352	0.365104	POSTN	1
GO:0086069	bundle of His cell to Purkinje myocyte communication	1/258	14/18670	0.177069	0.418352	0.365104	DSG2	1
GO:0090128	regulation of synapse maturation	1/258	14/18670	0.177069	0.418352	0.365104	NEUROD2	1
GO:0097202	activation of cysteine-type endopeptidase activity	1/258	14/18670	0.177069	0.418352	0.365104	RIPK2	1
GO:0097468	programmed cell death in response to reactive oxygen species	1/258	14/18670	0.177069	0.418352	0.365104	MET	1
GO:0099188	postsynaptic cytoskeleton organization	1/258	14/18670	0.177069	0.418352	0.365104	NEFL	1
GO:1903054	negative regulation of extracellular matrix organization	1/258	14/18670	0.177069	0.418352	0.365104	ADTRP	1
GO:1904748	regulation of apoptotic process involved in development	1/258	14/18670	0.177069	0.418352	0.365104	PAX2	1
GO:2001279	regulation of unsaturated fatty acid biosynthetic process	1/258	14/18670	0.177069	0.418352	0.365104	PTGS2	1
GO:0006641	triglyceride metabolic process	3/258	105/18670	0.17761	0.418352	0.365104	APOA2/APOC3/LIPF	3
GO:0015748	organophosphate ester transport	3/258	105/18670	0.17761	0.418352	0.365104	APOA2/APOC3/CALHM1	3
GO:0008037	cell recognition	5/258	215/18670	0.177691	0.418352	0.365104	CLEC4M/IGHG4/IGHM/IGHV4-31/TEX101	5
GO:0010810	regulation of cell-substrate adhesion	5/258	215/18670	0.177691	0.418352	0.365104	ALOX15/FGB/FGG/MYOC/POSTN	5
GO:0061448	connective tissue development	6/258	273/18670	0.177806	0.418352	0.365104	CHI3L1/COL2A1/HOXB3/PAX7/SHOX2/CCN4	6
GO:0098742	cell-cell adhesion via plasma-membrane adhesion molecules	6/258	273/18670	0.177806	0.418352	0.365104	CDHR4/DSG2/DSG3/LGALS7B/SELE/UMOD	6
GO:0002286	T cell activation involved in immune response	3/258	106/18670	0.181051	0.424689	0.370634	RIPK2/IL6/TNFSF18	3
GO:0021510	spinal cord development	3/258	106/18670	0.181051	0.424689	0.370634	DBX1/NEFL/PAX7	3
GO:0051251	positive regulation of lymphocyte activation	7/258	334/18670	0.181054	0.424689	0.370634	RIPK2/CD70/IGHG4/IGHM/IGHV4-31/IL6/TESPA1	7
GO:0050879	multicellular organismal movement	2/258	56/18670	0.181144	0.424689	0.370634	DRD3/TNNT2	2
GO:0050881	musculoskeletal movement	2/258	56/18670	0.181144	0.424689	0.370634	DRD3/TNNT2	2
GO:0044242	cellular lipid catabolic process	5/258	217/18670	0.18234	0.426583	0.372287	ADTRP/APOA2/APOC3/CYP26A1/PLA2G4F	5
GO:0046474	glycerophospholipid biosynthetic process	5/258	217/18670	0.18234	0.426583	0.372287	ALOX15/APOA2/CHAT/CPNE7/CWH43	5
GO:0050920	regulation of chemotaxis	5/258	217/18670	0.18234	0.426583	0.372287	IL6/MET/NTF3/S100A7/TBR1	5
GO:0010001	glial cell differentiation	5/258	218/18670	0.184682	0.427811	0.373358	DRD3/IL6/MYOC/PAX2/PHOX2B	5
GO:0051604	protein maturation	8/258	397/18670	0.185468	0.427811	0.373358	RIPK2/CFHR5/FGB/FGG/IGHG4/KLK2/KLK3/KLKB1	8
GO:0033344	cholesterol efflux	2/258	57/18670	0.186123	0.427811	0.373358	APOA2/APOC3	2
GO:0061178	regulation of insulin secretion involved in cellular response to glucose stimulus	2/258	57/18670	0.186123	0.427811	0.373358	CRH/VSNL1	2
GO:0009952	anterior/posterior pattern specification	5/258	219/18670	0.187034	0.427811	0.373358	ALX4/BARX1/HOXB3/SIX3/TBX1	5
GO:0001503	ossification	8/258	398/18670	0.187183	0.427811	0.373358	ALOX15/COL2A1/IL6/MYOC/GTPBP4/PTGS2/SHOX2/CCN4	8
GO:0032526	response to retinoic acid	3/258	108/18670	0.187986	0.427811	0.373358	CYP26A1/PAX2/TBX1	3
GO:0000098	sulfur amino acid catabolic process	1/258	15/18670	0.18845	0.427811	0.373358	AGXT	1
GO:0003352	regulation of cilium movement	1/258	15/18670	0.18845	0.427811	0.373358	DNAH11	1
GO:0006646	phosphatidylethanolamine biosynthetic process	1/258	15/18670	0.18845	0.427811	0.373358	ALOX15	1
GO:0015671	oxygen transport	1/258	15/18670	0.18845	0.427811	0.373358	NGB	1
GO:0018158	protein oxidation	1/258	15/18670	0.18845	0.427811	0.373358	APOA2	1
GO:0030299	intestinal cholesterol absorption	1/258	15/18670	0.18845	0.427811	0.373358	APOA2	1
GO:0030730	sequestering of triglyceride	1/258	15/18670	0.18845	0.427811	0.373358	CIDEA	1
GO:0032105	negative regulation of response to extracellular stimulus	1/258	15/18670	0.18845	0.427811	0.373358	CCK	1
GO:0032108	negative regulation of response to nutrient levels	1/258	15/18670	0.18845	0.427811	0.373358	CCK	1
GO:0032274	gonadotropin secretion	1/258	15/18670	0.18845	0.427811	0.373358	CRH	1
GO:0033604	negative regulation of catecholamine secretion	1/258	15/18670	0.18845	0.427811	0.373358	CRH	1
GO:0034111	negative regulation of homotypic cell-cell adhesion	1/258	15/18670	0.18845	0.427811	0.373358	FGG	1
GO:0034134	toll-like receptor 2 signaling pathway	1/258	15/18670	0.18845	0.427811	0.373358	RIPK2	1
GO:0034310	primary alcohol catabolic process	1/258	15/18670	0.18845	0.427811	0.373358	SULT2A1	1
GO:0034380	high-density lipoprotein particle assembly	1/258	15/18670	0.18845	0.427811	0.373358	APOA2	1
GO:0035635	entry of bacterium into host cell	1/258	15/18670	0.18845	0.427811	0.373358	MET	1
GO:0042754	negative regulation of circadian rhythm	1/258	15/18670	0.18845	0.427811	0.373358	CRH	1
GO:0043652	engulfment of apoptotic cell	1/258	15/18670	0.18845	0.427811	0.373358	ALOX15	1
GO:0044406	adhesion of symbiont to host	1/258	15/18670	0.18845	0.427811	0.373358	CLEC4M	1
GO:0045073	regulation of chemokine biosynthetic process	1/258	15/18670	0.18845	0.427811	0.373358	IL6	1
GO:0046851	negative regulation of bone remodeling	1/258	15/18670	0.18845	0.427811	0.373358	IL6	1
GO:0051883	killing of cells in other organism involved in symbiotic interaction	1/258	15/18670	0.18845	0.427811	0.373358	CXCL6	1
GO:0060099	regulation of phagocytosis, engulfment	1/258	15/18670	0.18845	0.427811	0.373358	ALOX15	1
GO:0060579	ventral spinal cord interneuron fate commitment	1/258	15/18670	0.18845	0.427811	0.373358	DBX1	1
GO:0060581	cell fate commitment involved in pattern specification	1/258	15/18670	0.18845	0.427811	0.373358	DBX1	1
GO:0070365	hepatocyte differentiation	1/258	15/18670	0.18845	0.427811	0.373358	HNF4A	1
GO:0071599	otic vesicle development	1/258	15/18670	0.18845	0.427811	0.373358	COL2A1	1
GO:0072075	metanephric mesenchyme development	1/258	15/18670	0.18845	0.427811	0.373358	PAX2	1
GO:0072148	epithelial cell fate commitment	1/258	15/18670	0.18845	0.427811	0.373358	ATOH1	1
GO:0072160	nephron tubule epithelial cell differentiation	1/258	15/18670	0.18845	0.427811	0.373358	PAX2	1
GO:0072283	metanephric renal vesicle morphogenesis	1/258	15/18670	0.18845	0.427811	0.373358	PAX2	1
GO:0090192	regulation of glomerulus development	1/258	15/18670	0.18845	0.427811	0.373358	PAX2	1
GO:0090197	positive regulation of chemokine secretion	1/258	15/18670	0.18845	0.427811	0.373358	POSTN	1
GO:1900119	positive regulation of execution phase of apoptosis	1/258	15/18670	0.18845	0.427811	0.373358	IL6	1
GO:2000402	negative regulation of lymphocyte migration	1/258	15/18670	0.18845	0.427811	0.373358	ADTRP	1
GO:2001028	positive regulation of endothelial cell chemotaxis	1/258	15/18670	0.18845	0.427811	0.373358	MET	1
GO:0031214	biomineral tissue development	4/258	163/18670	0.189343	0.429543	0.37487	ALOX15/KLK4/PTGS2/TBX1	4
GO:0001667	ameboidal-type cell migration	9/258	461/18670	0.189583	0.42979	0.375086	ADTRP/FGF7/KRT16/MET/PHOX2B/PITX2/PTGS2/PTPRR/TBX1	9
GO:0017001	antibiotic catabolic process	2/258	58/18670	0.191122	0.43165	0.376709	SULT2A1/TPO	2
GO:0042093	T-helper cell differentiation	2/258	58/18670	0.191122	0.43165	0.376709	RIPK2/IL6	2
GO:0051058	negative regulation of small GTPase mediated signal transduction	2/258	58/18670	0.191122	0.43165	0.376709	MET/MYOC	2
GO:0055081	anion homeostasis	2/258	58/18670	0.191122	0.43165	0.376709	HNF4A/SLC34A2	2
GO:1902041	regulation of extrinsic apoptotic signaling pathway via death domain receptors	2/258	58/18670	0.191122	0.43165	0.376709	FGB/FGG	2
GO:0046394	carboxylic acid biosynthetic process	9/258	462/18670	0.191189	0.43165	0.376709	ABCB11/AGXT/AKR1D1/ALOX15/APOC3/FADS1/FADS6/PLA2G4F/PTGS2	9
GO:0072009	nephron epithelium development	3/258	109/18670	0.191479	0.432008	0.377022	ADAMTS16/PAX2/UMOD	3
GO:0019724	B cell mediated immunity	5/258	221/18670	0.191772	0.432374	0.377341	CD70/CRP/IGHG4/IGHM/IGHV4-31	5
GO:0016053	organic acid biosynthetic process	9/258	463/18670	0.192802	0.434397	0.379107	ABCB11/AGXT/AKR1D1/ALOX15/APOC3/FADS1/FADS6/PLA2G4F/PTGS2	9
GO:0070663	regulation of leukocyte proliferation	5/258	222/18670	0.194157	0.437026	0.381401	RIPK2/CD70/IL5RA/IL6/TNFSF18	5
GO:0071695	anatomical structure maturation	4/258	165/18670	0.194943	0.437026	0.381401	FGG/MYOC/PAX2/SIX3	4
GO:0006939	smooth muscle contraction	3/258	110/18670	0.194988	0.437026	0.381401	MYH11/P2RX2/PTGS2	3
GO:0003012	muscle system process	9/258	465/18670	0.196044	0.437026	0.381401	ACTC1/DES/DSG2/MYH11/MYOC/P2RX2/PTGS2/SMPX/TNNT2	9
GO:0001658	branching involved in ureteric bud morphogenesis	2/258	59/18670	0.196138	0.437026	0.381401	ADAMTS16/PAX2	2
GO:0007602	phototransduction	2/258	59/18670	0.196138	0.437026	0.381401	GUCA1C/RHO	2
GO:0010518	positive regulation of phospholipase activity	2/258	59/18670	0.196138	0.437026	0.381401	NTF3/SELE	2
GO:2000351	regulation of endothelial cell apoptotic process	2/258	59/18670	0.196138	0.437026	0.381401	FGB/FGG	2
GO:0032956	regulation of actin cytoskeleton organization	7/258	343/18670	0.198005	0.437026	0.381401	ALOX15/CCL24/CSF3/MET/MIR149/MYOC/NTF3	7
GO:0031623	receptor internalization	3/258	111/18670	0.198514	0.437026	0.381401	DRD3/NTF3/SELE	3
GO:0097191	extrinsic apoptotic signaling pathway	5/258	224/18670	0.198958	0.437026	0.381401	CD70/COL2A1/FGB/FGG/LCN2	5
GO:0001780	neutrophil homeostasis	1/258	16/18670	0.199673	0.437026	0.381401	IL6	1
GO:0002070	epithelial cell maturation	1/258	16/18670	0.199673	0.437026	0.381401	SIX3	1
GO:0002295	T-helper cell lineage commitment	1/258	16/18670	0.199673	0.437026	0.381401	IL6	1
GO:0002739	regulation of cytokine secretion involved in immune response	1/258	16/18670	0.199673	0.437026	0.381401	APOA2	1
GO:0002830	positive regulation of type 2 immune response	1/258	16/18670	0.199673	0.437026	0.381401	IL6	1
GO:0006837	serotonin transport	1/258	16/18670	0.199673	0.437026	0.381401	CRH	1
GO:0006957	complement activation, alternative pathway	1/258	16/18670	0.199673	0.437026	0.381401	CFHR5	1
GO:0007567	parturition	1/258	16/18670	0.199673	0.437026	0.381401	CRH	1
GO:0010820	positive regulation of T cell chemotaxis	1/258	16/18670	0.199673	0.437026	0.381401	S100A7	1
GO:0010919	regulation of inositol phosphate biosynthetic process	1/258	16/18670	0.199673	0.437026	0.381401	MAS1	1
GO:0014048	regulation of glutamate secretion	1/258	16/18670	0.199673	0.437026	0.381401	CCK	1
GO:0014061	regulation of norepinephrine secretion	1/258	16/18670	0.199673	0.437026	0.381401	CRH	1
GO:0021542	dentate gyrus development	1/258	16/18670	0.199673	0.437026	0.381401	NEUROD6	1
GO:0042033	chemokine biosynthetic process	1/258	16/18670	0.199673	0.437026	0.381401	IL6	1
GO:0043031	negative regulation of macrophage activation	1/258	16/18670	0.199673	0.437026	0.381401	IL31RA	1
GO:0044065	regulation of respiratory system process	1/258	16/18670	0.199673	0.437026	0.381401	PHOX2B	1
GO:0045986	negative regulation of smooth muscle contraction	1/258	16/18670	0.199673	0.437026	0.381401	PTGS2	1
GO:0048012	hepatocyte growth factor receptor signaling pathway	1/258	16/18670	0.199673	0.437026	0.381401	MET	1
GO:0048385	regulation of retinoic acid receptor signaling pathway	1/258	16/18670	0.199673	0.437026	0.381401	CYP26A1	1
GO:0050755	chemokine metabolic process	1/258	16/18670	0.199673	0.437026	0.381401	IL6	1
GO:0051503	adenine nucleotide transport	1/258	16/18670	0.199673	0.437026	0.381401	CALHM1	1
GO:0051923	sulfation	1/258	16/18670	0.199673	0.437026	0.381401	SULT2A1	1
GO:0061548	ganglion development	1/258	16/18670	0.199673	0.437026	0.381401	PHOX2B	1
GO:0070293	renal absorption	1/258	16/18670	0.199673	0.437026	0.381401	HNF1A	1
GO:0072176	nephric duct development	1/258	16/18670	0.199673	0.437026	0.381401	PAX2	1
GO:0072189	ureter development	1/258	16/18670	0.199673	0.437026	0.381401	PAX2	1
GO:0072224	metanephric glomerulus development	1/258	16/18670	0.199673	0.437026	0.381401	PAX2	1
GO:0072488	ammonium transmembrane transport	1/258	16/18670	0.199673	0.437026	0.381401	SLC18A3	1
GO:0090335	regulation of brown fat cell differentiation	1/258	16/18670	0.199673	0.437026	0.381401	PTGS2	1
GO:0099170	postsynaptic modulation of chemical synaptic transmission	1/258	16/18670	0.199673	0.437026	0.381401	NRGN	1
GO:1905153	regulation of membrane invagination	1/258	16/18670	0.199673	0.437026	0.381401	ALOX15	1
GO:2000846	regulation of corticosteroid hormone secretion	1/258	16/18670	0.199673	0.437026	0.381401	CRH	1
GO:0007409	axonogenesis	9/258	468/18670	0.200952	0.439531	0.383588	ATOH1/CCK/GFRA3/LPAR3/NEFL/PAX2/PHOX2B/SHOX2/TBR1	9
GO:0002294	CD4-positive, alpha-beta T cell differentiation involved in immune response	2/258	60/18670	0.20117	0.439718	0.38375	RIPK2/IL6	2
GO:0001649	osteoblast differentiation	5/258	225/18670	0.201374	0.439871	0.383884	IL6/MYOC/GTPBP4/SHOX2/CCN4	5
GO:0014902	myotube differentiation	3/258	112/18670	0.202055	0.44019	0.384163	P2RX2/SHOX2/TBX1	3
GO:0043279	response to alkaloid	3/258	112/18670	0.202055	0.44019	0.384163	CRH/DRD3/SLC6A3	3
GO:0048593	camera-type eye morphogenesis	3/258	112/18670	0.202055	0.44019	0.384163	PAX2/PITX2/SIX3	3
GO:1990748	cellular detoxification	3/258	112/18670	0.202055	0.44019	0.384163	GSTA1/PTGS2/TPO	3
GO:0034614	cellular response to reactive oxygen species	4/258	168/18670	0.203437	0.442909	0.386535	IL6/LCN2/MET/PAX2	4
GO:0002287	alpha-beta T cell activation involved in immune response	2/258	61/18670	0.206218	0.445838	0.389091	RIPK2/IL6	2
GO:0002293	alpha-beta T cell differentiation involved in immune response	2/258	61/18670	0.206218	0.445838	0.389091	RIPK2/IL6	2
GO:0007405	neuroblast proliferation	2/258	61/18670	0.206218	0.445838	0.389091	DMRTA2/SIX3	2
GO:0016266	O-glycan processing	2/258	61/18670	0.206218	0.445838	0.389091	GALNT5/MUC2	2
GO:0045123	cellular extravasation	2/258	61/18670	0.206218	0.445838	0.389091	PRTN3/SELE	2
GO:0048645	animal organ formation	2/258	61/18670	0.206218	0.445838	0.389091	PAX2/TBR1	2
GO:0015698	inorganic anion transport	4/258	169/18670	0.206293	0.445838	0.389091	CLCA1/GABRA6/ROS1/SLC34A2	4
GO:0019216	regulation of lipid metabolic process	8/258	410/18670	0.208279	0.445838	0.389091	APOA2/APOC3/CIDEA/DRD3/FADS1/HNF4A/PTGS2/SULT2A1	8
GO:2000146	negative regulation of cell motility	7/258	349/18670	0.209641	0.445838	0.389091	ADTRP/KRT16/MIR149/GTPBP4/PTPRR/SEMG1/SEMG2	7
GO:0002031	G protein-coupled receptor internalization	1/258	17/18670	0.210743	0.445838	0.389091	DRD3	1
GO:0006544	glycine metabolic process	1/258	17/18670	0.210743	0.445838	0.389091	AGXT	1
GO:0006590	thyroid hormone generation	1/258	17/18670	0.210743	0.445838	0.389091	TPO	1
GO:0009070	serine family amino acid biosynthetic process	1/258	17/18670	0.210743	0.445838	0.389091	AGXT	1
GO:0010715	regulation of extracellular matrix disassembly	1/258	17/18670	0.210743	0.445838	0.389091	IL6	1
GO:0010819	regulation of T cell chemotaxis	1/258	17/18670	0.210743	0.445838	0.389091	S100A7	1
GO:0015868	purine ribonucleotide transport	1/258	17/18670	0.210743	0.445838	0.389091	CALHM1	1
GO:0017085	response to insecticide	1/258	17/18670	0.210743	0.445838	0.389091	NEFL	1
GO:0021514	ventral spinal cord interneuron differentiation	1/258	17/18670	0.210743	0.445838	0.389091	DBX1	1
GO:0021783	preganglionic parasympathetic fiber development	1/258	17/18670	0.210743	0.445838	0.389091	TBX1	1
GO:0031649	heat generation	1/258	17/18670	0.210743	0.445838	0.389091	PTGS2	1
GO:0032740	positive regulation of interleukin-17 production	1/258	17/18670	0.210743	0.445838	0.389091	IL6	1
GO:0032780	negative regulation of ATPase activity	1/258	17/18670	0.210743	0.445838	0.389091	TNNT2	1
GO:0032966	negative regulation of collagen biosynthetic process	1/258	17/18670	0.210743	0.445838	0.389091	IL6	1
GO:0034433	steroid esterification	1/258	17/18670	0.210743	0.445838	0.389091	APOA2	1
GO:0034434	sterol esterification	1/258	17/18670	0.210743	0.445838	0.389091	APOA2	1
GO:0034435	cholesterol esterification	1/258	17/18670	0.210743	0.445838	0.389091	APOA2	1
GO:0035855	megakaryocyte development	1/258	17/18670	0.210743	0.445838	0.389091	THPO	1
GO:0035930	corticosteroid hormone secretion	1/258	17/18670	0.210743	0.445838	0.389091	CRH	1
GO:0036149	phosphatidylinositol acyl-chain remodeling	1/258	17/18670	0.210743	0.445838	0.389091	PLA2G4F	1
GO:0043373	CD4-positive, alpha-beta T cell lineage commitment	1/258	17/18670	0.210743	0.445838	0.389091	IL6	1
GO:0048243	norepinephrine secretion	1/258	17/18670	0.210743	0.445838	0.389091	CRH	1
GO:0048532	anatomical structure arrangement	1/258	17/18670	0.210743	0.445838	0.389091	PAX2	1
GO:0051709	regulation of killing of cells of other organism	1/258	17/18670	0.210743	0.445838	0.389091	CXCL6	1
GO:0051818	disruption of cells of other organism involved in symbiotic interaction	1/258	17/18670	0.210743	0.445838	0.389091	CXCL6	1
GO:0060080	inhibitory postsynaptic potential	1/258	17/18670	0.210743	0.445838	0.389091	NPAS4	1
GO:0061323	cell proliferation involved in heart morphogenesis	1/258	17/18670	0.210743	0.445838	0.389091	PITX2	1
GO:0070166	enamel mineralization	1/258	17/18670	0.210743	0.445838	0.389091	TBX1	1
GO:0090185	negative regulation of kidney development	1/258	17/18670	0.210743	0.445838	0.389091	PAX2	1
GO:0098856	intestinal lipid absorption	1/258	17/18670	0.210743	0.445838	0.389091	APOA2	1
GO:0098884	postsynaptic neurotransmitter receptor internalization	1/258	17/18670	0.210743	0.445838	0.389091	DRD3	1
GO:0099509	regulation of presynaptic cytosolic calcium ion concentration	1/258	17/18670	0.210743	0.445838	0.389091	SCGN	1
GO:0140239	postsynaptic endocytosis	1/258	17/18670	0.210743	0.445838	0.389091	DRD3	1
GO:0009584	detection of visible light	2/258	62/18670	0.211279	0.445838	0.389091	GUCA1C/RHO	2
GO:0010830	regulation of myotube differentiation	2/258	62/18670	0.211279	0.445838	0.389091	SHOX2/TBX1	2
GO:0031640	killing of cells of other organism	2/258	62/18670	0.211279	0.445838	0.389091	CXCL6/SEMG1	2
GO:0044364	disruption of cells of other organism	2/258	62/18670	0.211279	0.445838	0.389091	CXCL6/SEMG1	2
GO:0050433	regulation of catecholamine secretion	2/258	62/18670	0.211279	0.445838	0.389091	CRH/DRD3	2
GO:0051898	negative regulation of protein kinase B signaling	2/258	62/18670	0.211279	0.445838	0.389091	DRD3/SFRP5	2
GO:0007162	negative regulation of cell adhesion	6/258	289/18670	0.21153	0.446082	0.389304	ADTRP/FGG/KNG1/MYOC/GTPBP4/POSTN	6
GO:0003205	cardiac chamber development	4/258	171/18670	0.212039	0.446869	0.389991	DNAH11/SHOX2/TBX1/TNNT2	4
GO:0032963	collagen metabolic process	3/258	115/18670	0.212764	0.44811	0.391074	IL6/MIR149/PRTN3	3
GO:0034330	cell junction organization	6/258	290/18670	0.21371	0.449814	0.392561	DSG2/FRMPD2B/KRT14/KRT5/MYOC/PRTN3	6
GO:0046486	glycerolipid metabolic process	8/258	414/18670	0.215512	0.453319	0.39562	ALOX15/APOA2/APOC3/CHAT/CPNE7/CWH43/LIPF/PLA2G4F	8
GO:0007588	excretion	2/258	63/18670	0.216352	0.453926	0.39615	DRD3/UMOD	2
GO:0032371	regulation of sterol transport	2/258	63/18670	0.216352	0.453926	0.39615	APOA2/APOC3	2
GO:0032374	regulation of cholesterol transport	2/258	63/18670	0.216352	0.453926	0.39615	APOA2/APOC3	2
GO:2000401	regulation of lymphocyte migration	2/258	63/18670	0.216352	0.453926	0.39615	ADTRP/S100A7	2
GO:0001659	temperature homeostasis	4/258	173/18670	0.21783	0.455203	0.397264	CIDEA/LCN2/PHOX2B/PTGS2	4
GO:0009410	response to xenobiotic stimulus	6/258	292/18670	0.218092	0.455203	0.397264	CRH/CYP26A1/DRD3/GSTA1/HNF4A/SLC6A3	6
GO:0042445	hormone metabolic process	5/258	232/18670	0.218555	0.455203	0.397264	AKR1D1/CHAT/CRH/CYP26A1/TPO	5
GO:1901222	regulation of NIK/NF-kappaB signaling	3/258	117/18670	0.219971	0.455203	0.397264	CHI3L1/MAS1/MIR149	3
GO:0006941	striated muscle contraction	4/258	174/18670	0.220741	0.455203	0.397264	ACTC1/DSG2/SMPX/TNNT2	4
GO:0035773	insulin secretion involved in cellular response to glucose stimulus	2/258	64/18670	0.221436	0.455203	0.397264	CRH/VSNL1	2
GO:0045600	positive regulation of fat cell differentiation	2/258	64/18670	0.221436	0.455203	0.397264	PTGS2/WIF1	2
GO:0045669	positive regulation of osteoblast differentiation	2/258	64/18670	0.221436	0.455203	0.397264	IL6/CCN4	2
GO:0050432	catecholamine secretion	2/258	64/18670	0.221436	0.455203	0.397264	CRH/DRD3	2
GO:1900449	regulation of glutamate receptor signaling pathway	2/258	64/18670	0.221436	0.455203	0.397264	CRH/NEFL	2
GO:0006704	glucocorticoid biosynthetic process	1/258	18/18670	0.221659	0.455203	0.397264	CRH	1
GO:0008090	retrograde axonal transport	1/258	18/18670	0.221659	0.455203	0.397264	NEFL	1
GO:0010713	negative regulation of collagen metabolic process	1/258	18/18670	0.221659	0.455203	0.397264	IL6	1
GO:0010766	negative regulation of sodium ion transport	1/258	18/18670	0.221659	0.455203	0.397264	DRD3	1
GO:0015865	purine nucleotide transport	1/258	18/18670	0.221659	0.455203	0.397264	CALHM1	1
GO:0034587	piRNA metabolic process	1/258	18/18670	0.221659	0.455203	0.397264	ASZ1	1
GO:0036148	phosphatidylglycerol acyl-chain remodeling	1/258	18/18670	0.221659	0.455203	0.397264	PLA2G4F	1
GO:0044320	cellular response to leptin stimulus	1/258	18/18670	0.221659	0.455203	0.397264	FGB	1
GO:0048557	embryonic digestive tract morphogenesis	1/258	18/18670	0.221659	0.455203	0.397264	SHOX2	1
GO:0048739	cardiac muscle fiber development	1/258	18/18670	0.221659	0.455203	0.397264	MYH11	1
GO:0051023	regulation of immunoglobulin secretion	1/258	18/18670	0.221659	0.455203	0.397264	IL6	1
GO:0051957	positive regulation of amino acid transport	1/258	18/18670	0.221659	0.455203	0.397264	CCK	1
GO:0060117	auditory receptor cell development	1/258	18/18670	0.221659	0.455203	0.397264	CLRN1	1
GO:0060977	coronary vasculature morphogenesis	1/258	18/18670	0.221659	0.455203	0.397264	TBX1	1
GO:0070230	positive regulation of lymphocyte apoptotic process	1/258	18/18670	0.221659	0.455203	0.397264	LGALS13	1
GO:0071318	cellular response to ATP	1/258	18/18670	0.221659	0.455203	0.397264	PTGS2	1
GO:0072077	renal vesicle morphogenesis	1/258	18/18670	0.221659	0.455203	0.397264	PAX2	1
GO:0072079	nephron tubule formation	1/258	18/18670	0.221659	0.455203	0.397264	PAX2	1
GO:0090026	positive regulation of monocyte chemotaxis	1/258	18/18670	0.221659	0.455203	0.397264	S100A7	1
GO:0090190	positive regulation of branching involved in ureteric bud morphogenesis	1/258	18/18670	0.221659	0.455203	0.397264	PAX2	1
GO:0090196	regulation of chemokine secretion	1/258	18/18670	0.221659	0.455203	0.397264	POSTN	1
GO:0090330	regulation of platelet aggregation	1/258	18/18670	0.221659	0.455203	0.397264	FGG	1
GO:0150078	positive regulation of neuroinflammatory response	1/258	18/18670	0.221659	0.455203	0.397264	IL6	1
GO:2000647	negative regulation of stem cell proliferation	1/258	18/18670	0.221659	0.455203	0.397264	KDF1	1
GO:0048511	rhythmic process	6/258	295/18670	0.224723	0.461207	0.402504	CRH/DRD3/HNF4A/NPS/PROKR2/SIX3	6
GO:0051480	regulation of cytosolic calcium ion concentration	7/258	357/18670	0.225543	0.462601	0.403721	KNG1/LPAR3/MCOLN3/P2RX2/PLCZ1/SCGN/TRPA1	7
GO:0009755	hormone-mediated signaling pathway	5/258	235/18670	0.226055	0.462896	0.403979	CRH/HNF4A/OR51E2/RXFP1/SSTR3	5
GO:0014823	response to activity	2/258	65/18670	0.22653	0.462896	0.403979	MAS1/POSTN	2
GO:0051187	cofactor catabolic process	2/258	65/18670	0.22653	0.462896	0.403979	AMBP/TPO	2
GO:0060675	ureteric bud morphogenesis	2/258	65/18670	0.22653	0.462896	0.403979	ADAMTS16/PAX2	2
GO:0072577	endothelial cell apoptotic process	2/258	65/18670	0.22653	0.462896	0.403979	FGB/FGG	2
GO:0072678	T cell migration	2/258	65/18670	0.22653	0.462896	0.403979	GPR15/S100A7	2
GO:0007368	determination of left/right symmetry	3/258	119/18670	0.227227	0.463852	0.404812	DNAH11/PITX2/TBX1	3
GO:0022604	regulation of cell morphogenesis	9/258	484/18670	0.227962	0.463852	0.404812	CCL24/FGB/FGG/LPAR3/MYOC/NEFL/POSTN/SHOX2/TBR1	9
GO:0043312	neutrophil degranulation	9/258	485/18670	0.229695	0.463852	0.404812	ACPP/CHI3L1/CXCL1/HSPA6/KRT1/LCN2/PRTN3/PTPRB/S100A7	9
GO:0003014	renal system process	3/258	120/18670	0.230872	0.463852	0.404812	DRD3/HNF1A/OR51E2	3
GO:0031669	cellular response to nutrient levels	5/258	237/18670	0.231097	0.463852	0.404812	DAPL1/FADS1/LCN2/POSTN/PTGS2	5
GO:0090130	tissue migration	7/258	360/18670	0.231612	0.463852	0.404812	ACTC1/ADTRP/FGF7/KRT16/MET/PTGS2/PTPRR	7
GO:0040014	regulation of multicellular organism growth	2/258	66/18670	0.231632	0.463852	0.404812	DRD3/SLC6A3	2
GO:0046888	negative regulation of hormone secretion	2/258	66/18670	0.231632	0.463852	0.404812	CRH/VSNL1	2
GO:0051926	negative regulation of calcium ion transport	2/258	66/18670	0.231632	0.463852	0.404812	PTGS2/SEMG1	2
GO:0072171	mesonephric tubule morphogenesis	2/258	66/18670	0.231632	0.463852	0.404812	ADAMTS16/PAX2	2
GO:0001710	mesodermal cell fate commitment	1/258	19/18670	0.232425	0.463852	0.404812	PAX2	1
GO:0001991	regulation of systemic arterial blood pressure by circulatory renin-angiotensin	1/258	19/18670	0.232425	0.463852	0.404812	OR51E2	1
GO:0002363	alpha-beta T cell lineage commitment	1/258	19/18670	0.232425	0.463852	0.404812	IL6	1
GO:0002726	positive regulation of T cell cytokine production	1/258	19/18670	0.232425	0.463852	0.404812	IL6	1
GO:0003085	negative regulation of systemic arterial blood pressure	1/258	19/18670	0.232425	0.463852	0.404812	CRH	1
GO:0006534	cysteine metabolic process	1/258	19/18670	0.232425	0.463852	0.404812	AGXT	1
GO:0010544	negative regulation of platelet activation	1/258	19/18670	0.232425	0.463852	0.404812	FGG	1
GO:0010985	negative regulation of lipoprotein particle clearance	1/258	19/18670	0.232425	0.463852	0.404812	APOC3	1
GO:0015669	gas transport	1/258	19/18670	0.232425	0.463852	0.404812	NGB	1
GO:0016075	rRNA catabolic process	1/258	19/18670	0.232425	0.463852	0.404812	SLFN13	1
GO:0021533	cell differentiation in hindbrain	1/258	19/18670	0.232425	0.463852	0.404812	PHOX2B	1
GO:0032095	regulation of response to food	1/258	19/18670	0.232425	0.463852	0.404812	CCK	1
GO:0032930	positive regulation of superoxide anion generation	1/258	19/18670	0.232425	0.463852	0.404812	CRP	1
GO:0033189	response to vitamin A	1/258	19/18670	0.232425	0.463852	0.404812	CYP26A1	1
GO:0042693	muscle cell fate commitment	1/258	19/18670	0.232425	0.463852	0.404812	TBX1	1
GO:0045063	T-helper 1 cell differentiation	1/258	19/18670	0.232425	0.463852	0.404812	RIPK2	1
GO:0045414	regulation of interleukin-8 biosynthetic process	1/258	19/18670	0.232425	0.463852	0.404812	APOA2	1
GO:0046641	positive regulation of alpha-beta T cell proliferation	1/258	19/18670	0.232425	0.463852	0.404812	RIPK2	1
GO:0060004	reflex	1/258	19/18670	0.232425	0.463852	0.404812	DRD3	1
GO:0060231	mesenchymal to epithelial transition	1/258	19/18670	0.232425	0.463852	0.404812	PAX2	1
GO:0060252	positive regulation of glial cell proliferation	1/258	19/18670	0.232425	0.463852	0.404812	IL6	1
GO:0060973	cell migration involved in heart development	1/258	19/18670	0.232425	0.463852	0.404812	PITX2	1
GO:0072074	kidney mesenchyme development	1/258	19/18670	0.232425	0.463852	0.404812	PAX2	1
GO:0072087	renal vesicle development	1/258	19/18670	0.232425	0.463852	0.404812	PAX2	1
GO:0098911	regulation of ventricular cardiac muscle cell action potential	1/258	19/18670	0.232425	0.463852	0.404812	DSG2	1
GO:1902074	response to salt	1/258	19/18670	0.232425	0.463852	0.404812	NEFL	1
GO:2000696	regulation of epithelial cell differentiation involved in kidney development	1/258	19/18670	0.232425	0.463852	0.404812	PAX2	1
GO:2000831	regulation of steroid hormone secretion	1/258	19/18670	0.232425	0.463852	0.404812	CRH	1
GO:0010950	positive regulation of endopeptidase activity	4/258	178/18670	0.232489	0.463852	0.404812	RIPK2/CCK/SEMG1/SEMG2	4
GO:0002460	adaptive immune response based on somatic recombination of immune receptors built from immunoglobulin superfamily domains	7/258	361/18670	0.233648	0.465634	0.406368	RIPK2/CD70/CRP/IGHG4/IGHM/IGHV4-31/IL6	7
GO:0018105	peptidyl-serine phosphorylation	6/258	299/18670	0.233665	0.465634	0.406368	RIPK2/SH2D3C/CSF3/IL6/NTF3/PTGS2	6
GO:0006479	protein methylation	4/258	179/18670	0.23545	0.468624	0.408977	DYDC1/EEF1AKMT3/PAX7/PRDM13	4
GO:0008213	protein alkylation	4/258	179/18670	0.23545	0.468624	0.408977	DYDC1/EEF1AKMT3/PAX7/PRDM13	4
GO:0048705	skeletal system morphogenesis	5/258	239/18670	0.236172	0.469777	0.409983	ALX4/COL2A1/HOXB3/SHOX2/TBX1	5
GO:0042108	positive regulation of cytokine biosynthetic process	2/258	67/18670	0.236741	0.470341	0.410476	APOA2/IL6	2
GO:0061371	determination of heart left/right asymmetry	2/258	67/18670	0.236741	0.470341	0.410476	DNAH11/TBX1	2
GO:0071466	cellular response to xenobiotic stimulus	4/258	180/18670	0.23842	0.4726	0.412447	CRH/CYP26A1/GSTA1/HNF4A	4
GO:0002292	T cell differentiation involved in immune response	2/258	68/18670	0.241857	0.4726	0.412447	RIPK2/IL6	2
GO:0003341	cilium movement	2/258	68/18670	0.241857	0.4726	0.412447	DNAH11/SPAG17	2
GO:0010812	negative regulation of cell-substrate adhesion	2/258	68/18670	0.241857	0.4726	0.412447	MYOC/POSTN	2
GO:0045806	negative regulation of endocytosis	2/258	68/18670	0.241857	0.4726	0.412447	APOC3/PRTN3	2
GO:0046323	glucose import	2/258	68/18670	0.241857	0.4726	0.412447	HNF1A/ITLN1	2
GO:0002062	chondrocyte differentiation	3/258	123/18670	0.241871	0.4726	0.412447	COL2A1/SHOX2/CCN4	3
GO:0051928	positive regulation of calcium ion transport	3/258	123/18670	0.241871	0.4726	0.412447	CRH/LPAR3/P2RX2	3
GO:0001502	cartilage condensation	1/258	20/18670	0.243043	0.4726	0.412447	COL2A1	1
GO:0002374	cytokine secretion involved in immune response	1/258	20/18670	0.243043	0.4726	0.412447	APOA2	1
GO:0002827	positive regulation of T-helper 1 type immune response	1/258	20/18670	0.243043	0.4726	0.412447	RIPK2	1
GO:0003323	type B pancreatic cell development	1/258	20/18670	0.243043	0.4726	0.412447	HNF4A	1
GO:0007620	copulation	1/258	20/18670	0.243043	0.4726	0.412447	SEMG1	1
GO:0010042	response to manganese ion	1/258	20/18670	0.243043	0.4726	0.412447	PTGS2	1
GO:0010592	positive regulation of lamellipodium assembly	1/258	20/18670	0.243043	0.4726	0.412447	CLRN1	1
GO:0023019	signal transduction involved in regulation of gene expression	1/258	20/18670	0.243043	0.4726	0.412447	HNF4A	1
GO:0030903	notochord development	1/258	20/18670	0.243043	0.4726	0.412447	COL2A1	1
GO:0032495	response to muramyl dipeptide	1/258	20/18670	0.243043	0.4726	0.412447	RIPK2	1
GO:0034104	negative regulation of tissue remodeling	1/258	20/18670	0.243043	0.4726	0.412447	IL6	1
GO:0034143	regulation of toll-like receptor 4 signaling pathway	1/258	20/18670	0.243043	0.4726	0.412447	BPIFB1	1
GO:0042053	regulation of dopamine metabolic process	1/258	20/18670	0.243043	0.4726	0.412447	SLC6A3	1
GO:0042069	regulation of catecholamine metabolic process	1/258	20/18670	0.243043	0.4726	0.412447	SLC6A3	1
GO:0042228	interleukin-8 biosynthetic process	1/258	20/18670	0.243043	0.4726	0.412447	APOA2	1
GO:0042474	middle ear morphogenesis	1/258	20/18670	0.243043	0.4726	0.412447	TBX1	1
GO:0043046	DNA methylation involved in gamete generation	1/258	20/18670	0.243043	0.4726	0.412447	ASZ1	1
GO:0043369	CD4-positive or CD8-positive, alpha-beta T cell lineage commitment	1/258	20/18670	0.243043	0.4726	0.412447	IL6	1
GO:0043586	tongue development	1/258	20/18670	0.243043	0.4726	0.412447	TBX1	1
GO:0048148	behavioral response to cocaine	1/258	20/18670	0.243043	0.4726	0.412447	DRD3	1
GO:0048670	regulation of collateral sprouting	1/258	20/18670	0.243043	0.4726	0.412447	LPAR3	1
GO:0051580	regulation of neurotransmitter uptake	1/258	20/18670	0.243043	0.4726	0.412447	DRD3	1
GO:0051797	regulation of hair follicle development	1/258	20/18670	0.243043	0.4726	0.412447	KRT17	1
GO:0060216	definitive hemopoiesis	1/258	20/18670	0.243043	0.4726	0.412447	HOXB3	1
GO:0060261	positive regulation of transcription initiation from RNA polymerase II promoter	1/258	20/18670	0.243043	0.4726	0.412447	HNF1A	1
GO:0090195	chemokine secretion	1/258	20/18670	0.243043	0.4726	0.412447	POSTN	1
GO:1900424	regulation of defense response to bacterium	1/258	20/18670	0.243043	0.4726	0.412447	CXCL6	1
GO:1903978	regulation of microglial cell activation	1/258	20/18670	0.243043	0.4726	0.412447	IL6	1
GO:0032259	methylation	7/258	366/18670	0.243915	0.474015	0.413682	ASZ1/DYDC1/RNMT/EEF1AKMT3/METTL7B/PAX7/PRDM13	7
GO:0009566	fertilization	4/258	182/18670	0.244386	0.474372	0.413993	LYZL6/PLCZ1/SERPINA5/TEX101	4
GO:0061138	morphogenesis of a branching epithelium	4/258	182/18670	0.244386	0.474372	0.413993	ADAMTS16/FGF7/MET/PAX2	4
GO:0014066	regulation of phosphatidylinositol 3-kinase signaling	3/258	124/18670	0.245556	0.476362	0.41573	CSF3/MYOC/NTF3	3
GO:0034381	plasma lipoprotein particle clearance	2/258	69/18670	0.246977	0.478273	0.417398	APOA2/APOC3	2
GO:0055008	cardiac muscle tissue morphogenesis	2/258	69/18670	0.246977	0.478273	0.417398	ACTC1/TNNT2	2
GO:0071300	cellular response to retinoic acid	2/258	69/18670	0.246977	0.478273	0.417398	PAX2/TBX1	2
GO:0021953	central nervous system neuron differentiation	4/258	183/18670	0.247382	0.478281	0.417405	DBX1/PAX7/PHOX2B/TBR1	4
GO:0050770	regulation of axonogenesis	4/258	183/18670	0.247382	0.478281	0.417405	LPAR3/NEFL/SHOX2/TBR1	4
GO:0006805	xenobiotic metabolic process	3/258	125/18670	0.249251	0.478281	0.417405	CYP26A1/GSTA1/HNF4A	3
GO:0035690	cellular response to drug	7/258	369/18670	0.250143	0.478281	0.417405	RIPK2/CRH/IL6/LCN2/MET/PAX2/PTGS2	7
GO:0042098	T cell proliferation	4/258	184/18670	0.250386	0.478281	0.417405	RIPK2/CD70/IL6/TNFSF18	4
GO:0050864	regulation of B cell activation	4/258	184/18670	0.250386	0.478281	0.417405	IGHG4/IGHM/IGHV4-31/IL6	4
GO:0032720	negative regulation of tumor necrosis factor production	2/258	70/18670	0.252101	0.478281	0.417405	CIDEA/MIR149	2
GO:0050766	positive regulation of phagocytosis	2/258	70/18670	0.252101	0.478281	0.417405	APOA2/SFTPA1	2
GO:0051966	regulation of synaptic transmission, glutamatergic	2/258	70/18670	0.252101	0.478281	0.417405	NPS/PTGS2	2
GO:0042391	regulation of membrane potential	8/258	434/18670	0.253033	0.478281	0.417405	CCK/DSG2/GABRA6/HTR3B/MYOC/NPAS4/NPS/P2RX2	8
GO:0050673	epithelial cell proliferation	8/258	434/18670	0.253033	0.478281	0.417405	CCL24/FGF7/IL26/KDF1/OR51E2/PAX2/SERPINB5/TBX1	8
GO:1903708	positive regulation of hemopoiesis	4/258	185/18670	0.253398	0.478281	0.417405	RIPK2/CSF3/TESPA1/THPO	4
GO:0000470	maturation of LSU-rRNA	1/258	21/18670	0.253515	0.478281	0.417405	GTPBP4	1
GO:0001779	natural killer cell differentiation	1/258	21/18670	0.253515	0.478281	0.417405	HNF1A	1
GO:0002029	desensitization of G protein-coupled receptor signaling pathway	1/258	21/18670	0.253515	0.478281	0.417405	DRD3	1
GO:0006067	ethanol metabolic process	1/258	21/18670	0.253515	0.478281	0.417405	SULT2A1	1
GO:0006144	purine nucleobase metabolic process	1/258	21/18670	0.253515	0.478281	0.417405	ACPP	1
GO:0009713	catechol-containing compound biosynthetic process	1/258	21/18670	0.253515	0.478281	0.417405	SLC6A3	1
GO:0010988	regulation of low-density lipoprotein particle clearance	1/258	21/18670	0.253515	0.478281	0.417405	APOC3	1
GO:0014821	phasic smooth muscle contraction	1/258	21/18670	0.253515	0.478281	0.417405	P2RX2	1
GO:0015874	norepinephrine transport	1/258	21/18670	0.253515	0.478281	0.417405	CRH	1
GO:0022401	negative adaptation of signaling pathway	1/258	21/18670	0.253515	0.478281	0.417405	DRD3	1
GO:0030277	maintenance of gastrointestinal epithelium	1/258	21/18670	0.253515	0.478281	0.417405	MUC2	1
GO:0030728	ovulation	1/258	21/18670	0.253515	0.478281	0.417405	PTGS2	1
GO:0032674	regulation of interleukin-5 production	1/258	21/18670	0.253515	0.478281	0.417405	IL5RA	1
GO:0032682	negative regulation of chemokine production	1/258	21/18670	0.253515	0.478281	0.417405	IL6	1
GO:0034389	lipid droplet organization	1/258	21/18670	0.253515	0.478281	0.417405	CIDEA	1
GO:0035162	embryonic hemopoiesis	1/258	21/18670	0.253515	0.478281	0.417405	TPO	1
GO:0035357	peroxisome proliferator activated receptor signaling pathway	1/258	21/18670	0.253515	0.478281	0.417405	ALOX15	1
GO:0035590	purinergic nucleotide receptor signaling pathway	1/258	21/18670	0.253515	0.478281	0.417405	P2RX2	1
GO:0035743	CD4-positive, alpha-beta T cell cytokine production	1/258	21/18670	0.253515	0.478281	0.417405	IL6	1
GO:0035813	regulation of renal sodium excretion	1/258	21/18670	0.253515	0.478281	0.417405	DRD3	1
GO:0036150	phosphatidylserine acyl-chain remodeling	1/258	21/18670	0.253515	0.478281	0.417405	PLA2G4F	1
GO:0042403	thyroid hormone metabolic process	1/258	21/18670	0.253515	0.478281	0.417405	TPO	1
GO:0042423	catecholamine biosynthetic process	1/258	21/18670	0.253515	0.478281	0.417405	SLC6A3	1
GO:0048245	eosinophil chemotaxis	1/258	21/18670	0.253515	0.478281	0.417405	CCL24	1
GO:0050951	sensory perception of temperature stimulus	1/258	21/18670	0.253515	0.478281	0.417405	TRPA1	1
GO:0060972	left/right pattern formation	1/258	21/18670	0.253515	0.478281	0.417405	PITX2	1
GO:0061213	positive regulation of mesonephros development	1/258	21/18670	0.253515	0.478281	0.417405	PAX2	1
GO:0090280	positive regulation of calcium ion import	1/258	21/18670	0.253515	0.478281	0.417405	CRH	1
GO:0098743	cell aggregation	1/258	21/18670	0.253515	0.478281	0.417405	COL2A1	1
GO:0140131	positive regulation of lymphocyte chemotaxis	1/258	21/18670	0.253515	0.478281	0.417405	S100A7	1
GO:1900273	positive regulation of long-term synaptic potentiation	1/258	21/18670	0.253515	0.478281	0.417405	NRGN	1
GO:1903055	positive regulation of extracellular matrix organization	1/258	21/18670	0.253515	0.478281	0.417405	IL6	1
GO:2001014	regulation of skeletal muscle cell differentiation	1/258	21/18670	0.253515	0.478281	0.417405	TBX1	1
GO:0009895	negative regulation of catabolic process	6/258	308/18670	0.254177	0.479256	0.418256	APOA2/APOC3/CIDEA/DAPL1/F13B/MET	6
GO:0043414	macromolecule methylation	6/258	309/18670	0.256487	0.483334	0.421815	ASZ1/DYDC1/RNMT/EEF1AKMT3/PAX7/PRDM13	6
GO:0032368	regulation of lipid transport	3/258	127/18670	0.256665	0.483393	0.421866	APOA2/APOC3/CRH	3
GO:0043647	inositol phosphate metabolic process	2/258	71/18670	0.257228	0.484176	0.42255	MAS1/PLCZ1	2
GO:0019933	cAMP-mediated signaling	4/258	187/18670	0.259444	0.484666	0.422977	CRH/DRD3/OR51E2/RXFP1	4
GO:0002576	platelet degranulation	3/258	128/18670	0.260383	0.484666	0.422977	FGB/FGG/KNG1	3
GO:0009855	determination of bilateral symmetry	3/258	128/18670	0.260383	0.484666	0.422977	DNAH11/PITX2/TBX1	3
GO:0051291	protein heterooligomerization	3/258	128/18670	0.260383	0.484666	0.422977	KRT1/SEMG1/SEMG2	3
GO:0032024	positive regulation of insulin secretion	2/258	72/18670	0.262356	0.484666	0.422977	CRH/VSNL1	2
GO:0035019	somatic stem cell population maintenance	2/258	72/18670	0.262356	0.484666	0.422977	PAX2/ZSCAN10	2
GO:0038034	signal transduction in absence of ligand	2/258	72/18670	0.262356	0.484666	0.422977	COL2A1/LCN2	2
GO:0051155	positive regulation of striated muscle cell differentiation	2/258	72/18670	0.262356	0.484666	0.422977	SHOX2/TBX1	2
GO:0051881	regulation of mitochondrial membrane potential	2/258	72/18670	0.262356	0.484666	0.422977	CCK/MYOC	2
GO:0060193	positive regulation of lipase activity	2/258	72/18670	0.262356	0.484666	0.422977	NTF3/SELE	2
GO:0061035	regulation of cartilage development	2/258	72/18670	0.262356	0.484666	0.422977	SHOX2/CCN4	2
GO:0097192	extrinsic apoptotic signaling pathway in absence of ligand	2/258	72/18670	0.262356	0.484666	0.422977	COL2A1/LCN2	2
GO:1903556	negative regulation of tumor necrosis factor superfamily cytokine production	2/258	72/18670	0.262356	0.484666	0.422977	CIDEA/MIR149	2
GO:0002052	positive regulation of neuroblast proliferation	1/258	22/18670	0.263842	0.484666	0.422977	DMRTA2	1
GO:0002089	lens morphogenesis in camera-type eye	1/258	22/18670	0.263842	0.484666	0.422977	SIX3	1
GO:0006925	inflammatory cell apoptotic process	1/258	22/18670	0.263842	0.484666	0.422977	IL6	1
GO:0007398	ectoderm development	1/258	22/18670	0.263842	0.484666	0.422977	KRT6B	1
GO:0010155	regulation of proton transport	1/258	22/18670	0.263842	0.484666	0.422977	DRD3	1
GO:0010226	response to lithium ion	1/258	22/18670	0.263842	0.484666	0.422977	PTGS2	1
GO:0010884	positive regulation of lipid storage	1/258	22/18670	0.263842	0.484666	0.422977	CIDEA	1
GO:0021513	spinal cord dorsal/ventral patterning	1/258	22/18670	0.263842	0.484666	0.422977	DBX1	1
GO:0021516	dorsal spinal cord development	1/258	22/18670	0.263842	0.484666	0.422977	PAX7	1
GO:0021854	hypothalamus development	1/258	22/18670	0.263842	0.484666	0.422977	CRH	1
GO:0023058	adaptation of signaling pathway	1/258	22/18670	0.263842	0.484666	0.422977	DRD3	1
GO:0031281	positive regulation of cyclase activity	1/258	22/18670	0.263842	0.484666	0.422977	GUCA1C	1
GO:0032634	interleukin-5 production	1/258	22/18670	0.263842	0.484666	0.422977	IL5RA	1
GO:0032727	positive regulation of interferon-alpha production	1/258	22/18670	0.263842	0.484666	0.422977	RIPK2	1
GO:0032928	regulation of superoxide anion generation	1/258	22/18670	0.263842	0.484666	0.422977	CRP	1
GO:0034643	establishment of mitochondrion localization, microtubule-mediated	1/258	22/18670	0.263842	0.484666	0.422977	NEFL	1
GO:0035929	steroid hormone secretion	1/258	22/18670	0.263842	0.484666	0.422977	CRH	1
GO:0044321	response to leptin	1/258	22/18670	0.263842	0.484666	0.422977	FGB	1
GO:0045624	positive regulation of T-helper cell differentiation	1/258	22/18670	0.263842	0.484666	0.422977	RIPK2	1
GO:0045717	negative regulation of fatty acid biosynthetic process	1/258	22/18670	0.263842	0.484666	0.422977	APOC3	1
GO:0045723	positive regulation of fatty acid biosynthetic process	1/258	22/18670	0.263842	0.484666	0.422977	PTGS2	1
GO:0046339	diacylglycerol metabolic process	1/258	22/18670	0.263842	0.484666	0.422977	APOA2	1
GO:0047497	mitochondrion transport along microtubule	1/258	22/18670	0.263842	0.484666	0.422977	NEFL	1
GO:0048305	immunoglobulin secretion	1/258	22/18670	0.263842	0.484666	0.422977	IL6	1
GO:0050765	negative regulation of phagocytosis	1/258	22/18670	0.263842	0.484666	0.422977	PRTN3	1
GO:0090189	regulation of branching involved in ureteric bud morphogenesis	1/258	22/18670	0.263842	0.484666	0.422977	PAX2	1
GO:1901685	glutathione derivative metabolic process	1/258	22/18670	0.263842	0.484666	0.422977	GSTA1	1
GO:1901687	glutathione derivative biosynthetic process	1/258	22/18670	0.263842	0.484666	0.422977	GSTA1	1
GO:0006639	acylglycerol metabolic process	3/258	129/18670	0.264109	0.484666	0.422977	APOA2/APOC3/LIPF	3
GO:0009799	specification of symmetry	3/258	129/18670	0.264109	0.484666	0.422977	DNAH11/PITX2/TBX1	3
GO:0050853	B cell receptor signaling pathway	3/258	129/18670	0.264109	0.484666	0.422977	IGHG4/IGHM/IGHV4-31	3
GO:0071482	cellular response to light stimulus	3/258	129/18670	0.264109	0.484666	0.422977	GUCA1C/PTGS2/RHO	3
GO:0045017	glycerolipid biosynthetic process	5/258	251/18670	0.267229	0.489605	0.427288	ALOX15/APOA2/CHAT/CPNE7/CWH43	5
GO:0009988	cell-cell recognition	2/258	73/18670	0.267485	0.489605	0.427288	CLEC4M/TEX101	2
GO:0045685	regulation of glial cell differentiation	2/258	73/18670	0.267485	0.489605	0.427288	DRD3/IL6	2
GO:0060350	endochondral bone morphogenesis	2/258	73/18670	0.267485	0.489605	0.427288	COL2A1/SHOX2	2
GO:0006638	neutral lipid metabolic process	3/258	130/18670	0.267841	0.489605	0.427288	APOA2/APOC3/LIPF	3
GO:0042157	lipoprotein metabolic process	3/258	130/18670	0.267841	0.489605	0.427288	APOA2/APOC3/CWH43	3
GO:0050671	positive regulation of lymphocyte proliferation	3/258	130/18670	0.267841	0.489605	0.427288	RIPK2/CD70/IL6	3
GO:0009416	response to light stimulus	6/258	314/18670	0.268121	0.489845	0.427497	CCK/DRD3/GUCA1C/NPS/PTGS2/RHO	6
GO:0071248	cellular response to metal ion	4/258	190/18670	0.268565	0.490385	0.427968	ALOX15/CPNE7/NEUROD2/PTGS2	4
GO:0050678	regulation of epithelial cell proliferation	7/258	378/18670	0.26911	0.491106	0.428598	CCL24/FGF7/IL26/KDF1/PAX2/SERPINB5/TBX1	7
GO:0032946	positive regulation of mononuclear cell proliferation	3/258	131/18670	0.27158	0.492173	0.429529	RIPK2/CD70/IL6	3
GO:0098754	detoxification	3/258	131/18670	0.27158	0.492173	0.429529	GSTA1/PTGS2/TPO	3
GO:0009583	detection of light stimulus	2/258	74/18670	0.272614	0.492173	0.429529	GUCA1C/RHO	2
GO:0031670	cellular response to nutrient	2/258	74/18670	0.272614	0.492173	0.429529	POSTN/PTGS2	2
GO:0032677	regulation of interleukin-8 production	2/258	74/18670	0.272614	0.492173	0.429529	APOA2/CRP	2
GO:0043367	CD4-positive, alpha-beta T cell differentiation	2/258	74/18670	0.272614	0.492173	0.429529	RIPK2/IL6	2
GO:0070373	negative regulation of ERK1 and ERK2 cascade	2/258	74/18670	0.272614	0.492173	0.429529	C1QL4/PTPRR	2
GO:0072078	nephron tubule morphogenesis	2/258	74/18670	0.272614	0.492173	0.429529	ADAMTS16/PAX2	2
GO:0099601	regulation of neurotransmitter receptor activity	2/258	74/18670	0.272614	0.492173	0.429529	CRH/NEFL	2
GO:0006898	receptor-mediated endocytosis	6/258	316/18670	0.272812	0.492173	0.429529	AMBP/APOC3/DRD3/MARCO/NTF3/SELE	6
GO:0002696	positive regulation of leukocyte activation	7/258	380/18670	0.273378	0.492173	0.429529	RIPK2/CD70/IGHG4/IGHM/IGHV4-31/IL6/TESPA1	7
GO:0032098	regulation of appetite	1/258	23/18670	0.274027	0.492173	0.429529	CCK	1
GO:0032331	negative regulation of chondrocyte differentiation	1/258	23/18670	0.274027	0.492173	0.429529	CCN4	1
GO:0032959	inositol trisphosphate biosynthetic process	1/258	23/18670	0.274027	0.492173	0.429529	PLCZ1	1
GO:0035812	renal sodium excretion	1/258	23/18670	0.274027	0.492173	0.429529	DRD3	1
GO:0043576	regulation of respiratory gaseous exchange	1/258	23/18670	0.274027	0.492173	0.429529	PHOX2B	1
GO:0046337	phosphatidylethanolamine metabolic process	1/258	23/18670	0.274027	0.492173	0.429529	ALOX15	1
GO:0051004	regulation of lipoprotein lipase activity	1/258	23/18670	0.274027	0.492173	0.429529	APOC3	1
GO:0051349	positive regulation of lyase activity	1/258	23/18670	0.274027	0.492173	0.429529	GUCA1C	1
GO:0060294	cilium movement involved in cell motility	1/258	23/18670	0.274027	0.492173	0.429529	DNAH11	1
GO:0060445	branching involved in salivary gland morphogenesis	1/258	23/18670	0.274027	0.492173	0.429529	FGF7	1
GO:0071157	negative regulation of cell cycle arrest	1/258	23/18670	0.274027	0.492173	0.429529	PHOX2B	1
GO:0071425	hematopoietic stem cell proliferation	1/258	23/18670	0.274027	0.492173	0.429529	THPO	1
GO:0072215	regulation of metanephros development	1/258	23/18670	0.274027	0.492173	0.429529	PAX2	1
GO:1901032	negative regulation of response to reactive oxygen species	1/258	23/18670	0.274027	0.492173	0.429529	MET	1
GO:1902259	regulation of delayed rectifier potassium channel activity	1/258	23/18670	0.274027	0.492173	0.429529	KCNS1	1
GO:1903206	negative regulation of hydrogen peroxide-induced cell death	1/258	23/18670	0.274027	0.492173	0.429529	MET	1
GO:2000291	regulation of myoblast proliferation	1/258	23/18670	0.274027	0.492173	0.429529	PAX7	1
GO:2001039	negative regulation of cellular response to drug	1/258	23/18670	0.274027	0.492173	0.429529	MET	1
GO:0051924	regulation of calcium ion transport	5/258	254/18670	0.275136	0.493895	0.431032	CRH/LPAR3/P2RX2/PTGS2/SEMG1	5
GO:0042476	odontogenesis	3/258	132/18670	0.275324	0.493963	0.431091	KLK4/PITX2/TBX1	3
GO:0045089	positive regulation of innate immune response	7/258	381/18670	0.275518	0.494043	0.431161	BPIFB1/RIPK2/FGB/FGG/MARCO/MUC2/SFTPA1	7
GO:0015914	phospholipid transport	2/258	75/18670	0.277741	0.497217	0.433931	APOA2/APOC3	2
GO:0046173	polyol biosynthetic process	2/258	75/18670	0.277741	0.497217	0.433931	MAS1/PLCZ1	2
GO:0150076	neuroinflammatory response	2/258	75/18670	0.277741	0.497217	0.433931	IL6/PTGS2	2
GO:0009581	detection of external stimulus	3/258	133/18670	0.279073	0.49933	0.435775	GUCA1C/RHO/TRPA1	3
GO:0006650	glycerophospholipid metabolic process	6/258	319/18670	0.279886	0.500124	0.436468	ALOX15/APOA2/CHAT/CPNE7/CWH43/PLA2G4F	6
GO:0007204	positive regulation of cytosolic calcium ion concentration	6/258	319/18670	0.279886	0.500124	0.436468	KNG1/LPAR3/MCOLN3/P2RX2/PLCZ1/TRPA1	6
GO:0051271	negative regulation of cellular component movement	7/258	384/18670	0.281967	0.500124	0.436468	ADTRP/KRT16/MIR149/GTPBP4/PTPRR/SEMG1/SEMG2	7
GO:0030260	entry into host cell	3/258	134/18670	0.282828	0.500124	0.436468	CLEC4M/GPR15/MET	3
GO:0044409	entry into host	3/258	134/18670	0.282828	0.500124	0.436468	CLEC4M/GPR15/MET	3
GO:0048565	digestive tract development	3/258	134/18670	0.282828	0.500124	0.436468	ALX4/SFRP5/SHOX2	3
GO:0051806	entry into cell of other organism involved in symbiotic interaction	3/258	134/18670	0.282828	0.500124	0.436468	CLEC4M/GPR15/MET	3
GO:0051828	entry into other organism involved in symbiotic interaction	3/258	134/18670	0.282828	0.500124	0.436468	CLEC4M/GPR15/MET	3
GO:0060411	cardiac septum morphogenesis	2/258	76/18670	0.282866	0.500124	0.436468	DNAH11/TBX1	2
GO:0072088	nephron epithelium morphogenesis	2/258	76/18670	0.282866	0.500124	0.436468	ADAMTS16/PAX2	2
GO:0048863	stem cell differentiation	5/258	257/18670	0.283091	0.500124	0.436468	PAX2/PHOX2B/PITX2/SIX3/TBX1	5
GO:0002227	innate immune response in mucosa	1/258	24/18670	0.284072	0.500124	0.436468	BPIFB1	1
GO:0006862	nucleotide transport	1/258	24/18670	0.284072	0.500124	0.436468	CALHM1	1
GO:0010288	response to lead ion	1/258	24/18670	0.284072	0.500124	0.436468	PTGS2	1
GO:0014850	response to muscle activity	1/258	24/18670	0.284072	0.500124	0.436468	POSTN	1
GO:0021511	spinal cord patterning	1/258	24/18670	0.284072	0.500124	0.436468	DBX1	1
GO:0021904	dorsal/ventral neural tube patterning	1/258	24/18670	0.284072	0.500124	0.436468	PAX7	1
GO:0033081	regulation of T cell differentiation in thymus	1/258	24/18670	0.284072	0.500124	0.436468	TESPA1	1
GO:0034505	tooth mineralization	1/258	24/18670	0.284072	0.500124	0.436468	TBX1	1
GO:0035588	G protein-coupled purinergic receptor signaling pathway	1/258	24/18670	0.284072	0.500124	0.436468	ACPP	1
GO:0044062	regulation of excretion	1/258	24/18670	0.284072	0.500124	0.436468	DRD3	1
GO:0046475	glycerophospholipid catabolic process	1/258	24/18670	0.284072	0.500124	0.436468	PLA2G4F	1
GO:0050427	3'-phosphoadenosine 5'-phosphosulfate metabolic process	1/258	24/18670	0.284072	0.500124	0.436468	SULT2A1	1
GO:0050857	positive regulation of antigen receptor-mediated signaling pathway	1/258	24/18670	0.284072	0.500124	0.436468	TESPA1	1
GO:0050996	positive regulation of lipid catabolic process	1/258	24/18670	0.284072	0.500124	0.436468	APOA2	1
GO:0062009	secondary palate development	1/258	24/18670	0.284072	0.500124	0.436468	TBX1	1
GO:0071677	positive regulation of mononuclear cell migration	1/258	24/18670	0.284072	0.500124	0.436468	S100A7	1
GO:0099590	neurotransmitter receptor internalization	1/258	24/18670	0.284072	0.500124	0.436468	DRD3	1
GO:1900118	negative regulation of execution phase of apoptosis	1/258	24/18670	0.284072	0.500124	0.436468	CIDEA	1
GO:2001026	regulation of endothelial cell chemotaxis	1/258	24/18670	0.284072	0.500124	0.436468	MET	1
GO:0001889	liver development	3/258	135/18670	0.286586	0.504012	0.439861	HNF4A/HNF1A/MET	3
GO:0060359	response to ammonium ion	3/258	135/18670	0.286586	0.504012	0.439861	CRH/DRD3/SLC6A3	3
GO:0018209	peptidyl-serine modification	6/258	322/18670	0.287001	0.504472	0.440263	RIPK2/SH2D3C/CSF3/IL6/NTF3/PTGS2	6
GO:1901224	positive regulation of NIK/NF-kappaB signaling	2/258	77/18670	0.287988	0.505938	0.441542	CHI3L1/MAS1	2
GO:0010952	positive regulation of peptidase activity	4/258	197/18670	0.290059	0.506968	0.442441	RIPK2/CCK/SEMG1/SEMG2	4
GO:0009582	detection of abiotic stimulus	3/258	136/18670	0.290349	0.506968	0.442441	GUCA1C/RHO/TRPA1	3
GO:0001910	regulation of leukocyte mediated cytotoxicity	2/258	78/18670	0.293106	0.506968	0.442441	CXCL6/DNASE1L3	2
GO:0042246	tissue regeneration	2/258	78/18670	0.293106	0.506968	0.442441	PAX7/POSTN	2
GO:0061333	renal tubule morphogenesis	2/258	78/18670	0.293106	0.506968	0.442441	ADAMTS16/PAX2	2
GO:0072028	nephron morphogenesis	2/258	78/18670	0.293106	0.506968	0.442441	ADAMTS16/PAX2	2
GO:0031099	regeneration	4/258	198/18670	0.29315	0.506968	0.442441	APOA2/NEFL/PAX7/POSTN	4
GO:0060541	respiratory system development	4/258	198/18670	0.29315	0.506968	0.442441	CHI3L1/CRH/FGF7/PHOX2B	4
GO:0051091	positive regulation of DNA-binding transcription factor activity	5/258	261/18670	0.293767	0.506968	0.442441	RIPK2/CSF3/IL6/NEUROD2/TNFSF18	5
GO:0001945	lymph vessel development	1/258	25/18670	0.293978	0.506968	0.442441	TBX1	1
GO:0002068	glandular epithelial cell development	1/258	25/18670	0.293978	0.506968	0.442441	HNF4A	1
GO:0002719	negative regulation of cytokine production involved in immune response	1/258	25/18670	0.293978	0.506968	0.442441	APOA2	1
GO:0003071	renal system process involved in regulation of systemic arterial blood pressure	1/258	25/18670	0.293978	0.506968	0.442441	OR51E2	1
GO:0003309	type B pancreatic cell differentiation	1/258	25/18670	0.293978	0.506968	0.442441	HNF4A	1
GO:0007214	gamma-aminobutyric acid signaling pathway	1/258	25/18670	0.293978	0.506968	0.442441	GABRA6	1
GO:0008211	glucocorticoid metabolic process	1/258	25/18670	0.293978	0.506968	0.442441	CRH	1
GO:0030325	adrenal gland development	1/258	25/18670	0.293978	0.506968	0.442441	CRH	1
GO:0032104	regulation of response to extracellular stimulus	1/258	25/18670	0.293978	0.506968	0.442441	CCK	1
GO:0032107	regulation of response to nutrient levels	1/258	25/18670	0.293978	0.506968	0.442441	CCK	1
GO:0032461	positive regulation of protein oligomerization	1/258	25/18670	0.293978	0.506968	0.442441	CCK	1
GO:0034035	purine ribonucleoside bisphosphate metabolic process	1/258	25/18670	0.293978	0.506968	0.442441	SULT2A1	1
GO:0034110	regulation of homotypic cell-cell adhesion	1/258	25/18670	0.293978	0.506968	0.442441	FGG	1
GO:0050901	leukocyte tethering or rolling	1/258	25/18670	0.293978	0.506968	0.442441	SELE	1
GO:0050927	positive regulation of positive chemotaxis	1/258	25/18670	0.293978	0.506968	0.442441	NTF3	1
GO:0051654	establishment of mitochondrion localization	1/258	25/18670	0.293978	0.506968	0.442441	NEFL	1
GO:0051894	positive regulation of focal adhesion assembly	1/258	25/18670	0.293978	0.506968	0.442441	MYOC	1
GO:0060561	apoptotic process involved in morphogenesis	1/258	25/18670	0.293978	0.506968	0.442441	PAX2	1
GO:0061217	regulation of mesonephros development	1/258	25/18670	0.293978	0.506968	0.442441	PAX2	1
GO:0072202	cell differentiation involved in metanephros development	1/258	25/18670	0.293978	0.506968	0.442441	PAX2	1
GO:0072273	metanephric nephron morphogenesis	1/258	25/18670	0.293978	0.506968	0.442441	PAX2	1
GO:0072677	eosinophil migration	1/258	25/18670	0.293978	0.506968	0.442441	CCL24	1
GO:0090025	regulation of monocyte chemotaxis	1/258	25/18670	0.293978	0.506968	0.442441	S100A7	1
GO:1904385	cellular response to angiotensin	1/258	25/18670	0.293978	0.506968	0.442441	MAS1	1
GO:1905809	negative regulation of synapse organization	1/258	25/18670	0.293978	0.506968	0.442441	NEUROD2	1
GO:2000482	regulation of interleukin-8 secretion	1/258	25/18670	0.293978	0.506968	0.442441	CRP	1
GO:0060048	cardiac muscle contraction	3/258	137/18670	0.294116	0.506968	0.442441	ACTC1/DSG2/TNNT2	3
GO:0061008	hepaticobiliary system development	3/258	138/18670	0.297885	0.512701	0.447444	HNF4A/HNF1A/MET	3
GO:0003151	outflow tract morphogenesis	2/258	79/18670	0.298219	0.512701	0.447444	PITX2/TBX1	2
GO:0007032	endosome organization	2/258	79/18670	0.298219	0.512701	0.447444	ANXA8L1/ANXA8	2
GO:0031110	regulation of microtubule polymerization or depolymerization	2/258	79/18670	0.298219	0.512701	0.447444	MET/STMND1	2
GO:0045652	regulation of megakaryocyte differentiation	2/258	79/18670	0.298219	0.512701	0.447444	H3C14/THPO	2
GO:0006874	cellular calcium ion homeostasis	8/258	458/18670	0.300509	0.516367	0.450644	DRD3/KNG1/LPAR3/MCOLN3/P2RX2/PLCZ1/SCGN/TRPA1	8
GO:0016571	histone methylation	3/258	139/18670	0.301658	0.51681	0.45103	DYDC1/PAX7/PRDM13	3
GO:0050715	positive regulation of cytokine secretion	3/258	139/18670	0.301658	0.51681	0.45103	RIPK2/IL26/POSTN	3
GO:0070509	calcium ion import	2/258	80/18670	0.303327	0.51681	0.45103	CRH/SEMG1	2
GO:0010959	regulation of metal ion transport	7/258	394/18670	0.303719	0.51681	0.45103	CRH/DRD3/KCNS1/LPAR3/P2RX2/PTGS2/SEMG1	7
GO:0050867	positive regulation of cell activation	7/258	394/18670	0.303719	0.51681	0.45103	RIPK2/CD70/IGHG4/IGHM/IGHV4-31/IL6/TESPA1	7
GO:0002360	T cell lineage commitment	1/258	26/18670	0.303747	0.51681	0.45103	IL6	1
GO:0022011	myelination in peripheral nervous system	1/258	26/18670	0.303747	0.51681	0.45103	MYOC	1
GO:0030318	melanocyte differentiation	1/258	26/18670	0.303747	0.51681	0.45103	OR51E2	1
GO:0032292	peripheral nervous system axon ensheathment	1/258	26/18670	0.303747	0.51681	0.45103	MYOC	1
GO:0032957	inositol trisphosphate metabolic process	1/258	26/18670	0.303747	0.51681	0.45103	PLCZ1	1
GO:0032967	positive regulation of collagen biosynthetic process	1/258	26/18670	0.303747	0.51681	0.45103	MIR149	1
GO:0035640	exploration behavior	1/258	26/18670	0.303747	0.51681	0.45103	CRH	1
GO:0036152	phosphatidylethanolamine acyl-chain remodeling	1/258	26/18670	0.303747	0.51681	0.45103	PLA2G4F	1
GO:0050926	regulation of positive chemotaxis	1/258	26/18670	0.303747	0.51681	0.45103	NTF3	1
GO:0055003	cardiac myofibril assembly	1/258	26/18670	0.303747	0.51681	0.45103	ACTC1	1
GO:0055083	monovalent inorganic anion homeostasis	1/258	26/18670	0.303747	0.51681	0.45103	SLC34A2	1
GO:0060037	pharyngeal system development	1/258	26/18670	0.303747	0.51681	0.45103	TBX1	1
GO:0071624	positive regulation of granulocyte chemotaxis	1/258	26/18670	0.303747	0.51681	0.45103	S100A7	1
GO:0072539	T-helper 17 cell differentiation	1/258	26/18670	0.303747	0.51681	0.45103	IL6	1
GO:0035725	sodium ion transmembrane transport	3/258	140/18670	0.305432	0.518546	0.452545	ABCB11/DRD3/SLC34A2	3
GO:0042737	drug catabolic process	3/258	140/18670	0.305432	0.518546	0.452545	SLC6A3/SULT2A1/TPO	3
GO:0060078	regulation of postsynaptic membrane potential	3/258	140/18670	0.305432	0.518546	0.452545	GABRA6/NPAS4/P2RX2	3
GO:0072073	kidney epithelium development	3/258	140/18670	0.305432	0.518546	0.452545	ADAMTS16/PAX2/UMOD	3
GO:0050870	positive regulation of T cell activation	4/258	202/18670	0.305555	0.518546	0.452545	RIPK2/CD70/IL6/TESPA1	4
GO:0046883	regulation of hormone secretion	5/258	266/18670	0.307207	0.521081	0.454757	CRH/FGB/FGG/HNF4A/VSNL1	5
GO:0040013	negative regulation of locomotion	7/258	396/18670	0.308112	0.522211	0.455744	ADTRP/KRT16/MIR149/GTPBP4/PTPRR/SEMG1/SEMG2	7
GO:0030512	negative regulation of transforming growth factor beta receptor signaling pathway	2/258	81/18670	0.308427	0.522211	0.455744	CIDEA/WFIKKN2	2
GO:0110110	positive regulation of animal organ morphogenesis	2/258	81/18670	0.308427	0.522211	0.455744	FGF7/PAX2	2
GO:0008202	steroid metabolic process	6/258	331/18670	0.308569	0.522211	0.455744	ABCB11/AKR1D1/APOA2/CRH/CYP26A1/SULT2A1	6
GO:0007266	Rho protein signal transduction	4/258	203/18670	0.308666	0.522211	0.455744	APOC3/MET/MYOC/PLEKHG4B	4
GO:0002573	myeloid leukocyte differentiation	4/258	204/18670	0.31178	0.523966	0.457275	CSF3/IL31RA/PRTN3/CCN4	4
GO:0031668	cellular response to extracellular stimulus	5/258	268/18670	0.312609	0.523966	0.457275	DAPL1/FADS1/LCN2/POSTN/PTGS2	5
GO:0072006	nephron development	3/258	142/18670	0.312988	0.523966	0.457275	ADAMTS16/PAX2/UMOD	3
GO:1902904	negative regulation of supramolecular fiber organization	3/258	142/18670	0.312988	0.523966	0.457275	MET/MIR149/MYOC	3
GO:0002825	regulation of T-helper 1 type immune response	1/258	27/18670	0.313382	0.523966	0.457275	RIPK2	1
GO:0003148	outflow tract septum morphogenesis	1/258	27/18670	0.313382	0.523966	0.457275	TBX1	1
GO:0006706	steroid catabolic process	1/258	27/18670	0.313382	0.523966	0.457275	AKR1D1	1
GO:0010714	positive regulation of collagen metabolic process	1/258	27/18670	0.313382	0.523966	0.457275	MIR149	1
GO:0010971	positive regulation of G2/M transition of mitotic cell cycle	1/258	27/18670	0.313382	0.523966	0.457275	PHOX2B	1
GO:0035883	enteroendocrine cell differentiation	1/258	27/18670	0.313382	0.523966	0.457275	HNF4A	1
GO:0035902	response to immobilization stress	1/258	27/18670	0.313382	0.523966	0.457275	CRH	1
GO:0036151	phosphatidylcholine acyl-chain remodeling	1/258	27/18670	0.313382	0.523966	0.457275	PLA2G4F	1
GO:0045932	negative regulation of muscle contraction	1/258	27/18670	0.313382	0.523966	0.457275	PTGS2	1
GO:0048143	astrocyte activation	1/258	27/18670	0.313382	0.523966	0.457275	IL6	1
GO:0048668	collateral sprouting	1/258	27/18670	0.313382	0.523966	0.457275	LPAR3	1
GO:0048799	animal organ maturation	1/258	27/18670	0.313382	0.523966	0.457275	PAX2	1
GO:0051450	myoblast proliferation	1/258	27/18670	0.313382	0.523966	0.457275	PAX7	1
GO:0051953	negative regulation of amine transport	1/258	27/18670	0.313382	0.523966	0.457275	CRH	1
GO:0060259	regulation of feeding behavior	1/258	27/18670	0.313382	0.523966	0.457275	CCK	1
GO:0098810	neurotransmitter reuptake	1/258	27/18670	0.313382	0.523966	0.457275	DRD3	1
GO:1901623	regulation of lymphocyte chemotaxis	1/258	27/18670	0.313382	0.523966	0.457275	S100A7	1
GO:2000144	positive regulation of DNA-templated transcription, initiation	1/258	27/18670	0.313382	0.523966	0.457275	HNF1A	1
GO:0032147	activation of protein kinase activity	6/258	333/18670	0.313402	0.523966	0.457275	RIPK2/CHI3L1/LPAR3/MAP3K19/MAS1/NTF3	6
GO:1905954	positive regulation of lipid localization	2/258	82/18670	0.313521	0.523966	0.457275	CIDEA/CRH	2
GO:0044344	cellular response to fibroblast growth factor stimulus	3/258	143/18670	0.316767	0.528588	0.461309	FGF7/POSTN/TBX1	3
GO:0106106	cold-induced thermogenesis	3/258	143/18670	0.316767	0.528588	0.461309	CIDEA/LCN2/PHOX2B	3
GO:0120161	regulation of cold-induced thermogenesis	3/258	143/18670	0.316767	0.528588	0.461309	CIDEA/LCN2/PHOX2B	3
GO:0050679	positive regulation of epithelial cell proliferation	4/258	206/18670	0.318016	0.530402	0.462892	CCL24/FGF7/PAX2/TBX1	4
GO:0045582	positive regulation of T cell differentiation	2/258	83/18670	0.318606	0.530849	0.463282	RIPK2/TESPA1	2
GO:1903845	negative regulation of cellular response to transforming growth factor beta stimulus	2/258	83/18670	0.318606	0.530849	0.463282	CIDEA/WFIKKN2	2
GO:0001958	endochondral ossification	1/258	28/18670	0.322884	0.532323	0.464568	COL2A1	1
GO:0007205	protein kinase C-activating G protein-coupled receptor signaling pathway	1/258	28/18670	0.322884	0.532323	0.464568	CCK	1
GO:0008209	androgen metabolic process	1/258	28/18670	0.322884	0.532323	0.464568	AKR1D1	1
GO:0010818	T cell chemotaxis	1/258	28/18670	0.322884	0.532323	0.464568	S100A7	1
GO:0018146	keratan sulfate biosynthetic process	1/258	28/18670	0.322884	0.532323	0.464568	KERA	1
GO:0021846	cell proliferation in forebrain	1/258	28/18670	0.322884	0.532323	0.464568	SIX3	1
GO:0032647	regulation of interferon-alpha production	1/258	28/18670	0.322884	0.532323	0.464568	RIPK2	1
GO:0034698	response to gonadotropin	1/258	28/18670	0.322884	0.532323	0.464568	MAS1	1
GO:0035116	embryonic hindlimb morphogenesis	1/258	28/18670	0.322884	0.532323	0.464568	ALX4	1
GO:0036075	replacement ossification	1/258	28/18670	0.322884	0.532323	0.464568	COL2A1	1
GO:0042634	regulation of hair cycle	1/258	28/18670	0.322884	0.532323	0.464568	KRT17	1
GO:0043501	skeletal muscle adaptation	1/258	28/18670	0.322884	0.532323	0.464568	MYOC	1
GO:0045686	negative regulation of glial cell differentiation	1/258	28/18670	0.322884	0.532323	0.464568	DRD3	1
GO:0060122	inner ear receptor cell stereocilium organization	1/258	28/18670	0.322884	0.532323	0.464568	CLRN1	1
GO:0060260	regulation of transcription initiation from RNA polymerase II promoter	1/258	28/18670	0.322884	0.532323	0.464568	HNF1A	1
GO:0060512	prostate gland morphogenesis	1/258	28/18670	0.322884	0.532323	0.464568	SERPINB5	1
GO:0085029	extracellular matrix assembly	1/258	28/18670	0.322884	0.532323	0.464568	MYH11	1
GO:1902745	positive regulation of lamellipodium organization	1/258	28/18670	0.322884	0.532323	0.464568	CLRN1	1
GO:1902932	positive regulation of alcohol biosynthetic process	1/258	28/18670	0.322884	0.532323	0.464568	MAS1	1
GO:2000108	positive regulation of leukocyte apoptotic process	1/258	28/18670	0.322884	0.532323	0.464568	LGALS13	1
GO:2001025	positive regulation of response to drug	1/258	28/18670	0.322884	0.532323	0.464568	CRH	1
[truncated: 1,296 more rows]
