# Supplementary material for: Clinical Significance and Molecular Annotation of Cellular Morphometric Subtypes in Lower Grade Gliomas discovered by Machine Learning: a retrospective multicentric study
Source: Research Square preprint supplement (doi:10.21203/rs.3.rs-770415/v2), 2021-08-16
Supplement: Supplementary file 33 [file d49adc838024f3e1c974f4e1.xlsx]

## Sheet: TableS11-ZN-GBM-CMC_new
Supplementary Table 11. Metadata and cellular morphometric representation of patients in ZN-GBM cohort.
	OS time	OS	Age	Gender	TERT	MGMT methylation	Subtype	CMB_168	CMB_89	CMB_166	CMB_131	CMB_116	CMB_2	CMB_140	CMB_197	CMB_17	CMB_43	CMB_202	CMB_210	CMB_83	CMB_23	CMB_162	CMB_145	CMB_139	CMB_115	CMB_208	CMB_152	CMB_147	CMB_72	CMB_6	CMB_196	CMB_177	CMB_144	CMB_223	CMB_245	CMB_30	CMB_181
ZN-GBM-01	11.13	1	69	Female	NA	NA	2	1.91847	2.85202	2.24995	0.850553	0.777108	0.763902	0.919166	1.43121	1.15659	0.835606	0.824592	4.01478	1.18288	0.816275	1.00171	0.867524	6.33026	1.95274	1.37378	0.988735	1.5627	1.67711	2.64618	0.233256	0.084741	5.08118	6.27912	2.64286	1.9605	1.07915
ZN-GBM-02	2.6	1	54	Male	W	Hypermethylated	1	1.35146	2.0095	1.58506	0.599173	0.547474	0.537775	0.647982	1.00821	0.825406	0.588643	0.586426	3.20234	0.833284	11.2693	0.705659	0.611128	4.45936	1.37561	0.967757	0.696515	1.10085	1.67686	1.8641	10.4942	0.085082	3.71459	6.05348	7.52845	1.38107	0.760208
ZN-GBM-03	127.87	1	38	Male	W	Hypermethylated	2	1.80586	2.68515	2.118	0.80063	0.731495	0.715679	0.862888	1.34715	1.05559	0.786559	0.784073	4.27519	1.11346	3.31535	0.942919	0.816604	5.9587	1.83813	1.29314	0.9307	1.47098	1.9957	2.49086	0.10923	0.213736	4.0635	6.90025	4.78706	1.84543	1.01581
ZN-GBM-04	9.37	1	59	Male	M	Hypermethylated	2	1.87258	2.78435	2.19624	0.830208	0.758519	0.744971	0.897783	1.39697	1.12168	0.815618	0.76916	4.42513	1.15459	2.27879	0.977754	0.846773	6.17884	1.90603	1.34092	0.965084	1.52532	1.94553	2.58288	0.201732	0.043625	3.4081	7.46397	2.6311	1.9136	1.05334
ZN-GBM-05	1.13	1	12	Female	NA	NA	2	1.99377	2.63146	2.35332	0.889673	0.812908	0.798566	0.961618	1.49703	1.17781	0.874038	0.87104	0.267249	1.23729	0.069106	1.04779	0.907424	6.62141	2.04256	1.43696	1.03421	1.63457	2.15476	2.76789	1.42568	0.129043	4.36925	7.15747	1.48439	2.05067	1.12878
ZN-GBM-06	11.97	1	68	Female	NA	NA	2	2.17823	3.23442	2.55488	0.965776	0.882445	0.865983	1.04368	1.62509	1.30727	0.948804	0.945741	2.39657	1.34313	0.345047	1.13742	0.985046	7.18781	2.21728	1.55988	1.12268	1.77433	2.1432	2.92598	0.071431	0.132067	0.959523	0.491285	4.16568	1.35729	1.22534
ZN-GBM-07	36.2	0	58	Female	NA	NA	1	1.22625	1.82333	1.43821	0.543661	0.496751	0.48867	0.587948	0.914806	0.750443	0.534106	0.532526	2.90565	0.756082	10.2285	0.640281	0.554508	4.04621	1.24816	0.878097	0.631984	0.998855	1.55685	1.6914	17.4915	0.90209	3.35453	5.51922	7.09999	1.25312	0.689777
ZN-GBM-08	4.7	1	63	Male	W	Hypermethylated	2	1.67866	2.49596	1.96881	0.744235	0.67997	0.669694	0.804813	1.25226	1.00056	0.731156	0.727616	3.97588	1.03503	1.12476	0.876502	0.759085	5.53899	1.70865	1.20206	0.865144	1.36736	2.12856	2.31541	0.27691	1.22989	4.57899	7.54217	9.73121	1.71544	0.944259
ZN-GBM-09	16.1	1	61	Male	NA	NA	1	1.4985	2.22813	1.75751	0.664361	0.606993	0.596283	0.718393	1.1179	0.916525	0.652686	0.631398	3.55075	0.923943	12.4634	0.782433	0.677617	4.94452	1.52527	1.07305	0.772293	1.22061	1.87141	2.06691	2.68887	0.448277	3.65148	6.73754	7.28708	1.53133	0.842917
ZN-GBM-10	1.83	1	63	Male	NA	NA	2	1.91114	2.84163	2.23968	0.847304	0.774139	0.762047	0.916215	1.42568	1.15094	0.832413	0.825416	4.51978	1.17837	3.00643	0.997888	0.86421	6.30608	1.94528	1.36853	0.984957	1.55673	1.31837	2.63607	0.094723	0.455672	5.18229	5.83697	0.736633	1.95301	1.07503
ZN-GBM-11	47.8	0	43	Male	M	Hypermethylated	1	1.23598	1.83778	1.44961	0.547971	0.50069	0.492761	0.59261	0.922059	0.755524	0.538341	0.536748	2.92869	0.762077	10.3096	0.645358	0.558905	4.07829	1.25806	0.885059	0.636995	1.00677	1.56419	1.70481	17.6288	0.093654	3.39658	5.55682	7.16497	1.26306	0.695246
ZN-GBM-12	27.37	0	65	Male	M	Hypermethylated	2	1.95433	2.90538	2.29212	0.866452	0.791691	0.780013	0.918373	1.45475	1.15771	0.851225	0.845615	4.34108	1.205	0.625968	1.02044	0.88374	6.44859	1.98913	1.39945	1.00722	1.59191	2.36036	2.69324	0.008365	0.016388	0.804685	0.862903	10.9474	1.69232	1.09932
ZN-GBM-13	32.8	0	39	Male	M	Hypomethylated	1	1.89157	2.81259	2.21819	0.838629	0.766269	0.750977	0.90146	1.41103	1.1186	0.823891	0.821453	4.48209	1.1663	11.2048	0.987672	0.855362	6.24152	1.92537	1.35452	0.974873	1.54074	1.61753	2.60908	0.14153	0.014318	1.14608	1.96604	0.990886	1.93251	1.06402
ZN-GBM-14	3.33	1	62	Male	NA	NA	1	1.38296	2.05633	1.62188	0.613135	0.560231	0.54901	0.661097	1.03106	0.846342	0.60236	0.600497	3.27697	0.852702	11.5356	0.722103	0.625369	4.56327	1.40742	0.990309	0.712745	1.1265	1.37032	1.90754	19.6822	0.240956	2.53469	3.40502	1.33188	1.41326	0.777923
ZN-GBM-15	30.63	0	54	Male	W	Hypermethylated	1	1.46966	2.18525	1.72368	0.651574	0.595354	0.585453	0.704652	1.09639	0.883172	0.640124	0.638229	3.48241	0.90616	11.5209	0.767373	0.664575	4.84936	1.49592	1.05239	0.757429	1.19712	1.85296	2.02713	2.91073	0.010204	4.0289	6.61561	8.51963	1.50186	0.826693
ZN-GBM-16	1.27	1	43	Male	W	Hypomethylated	2	1.64254	2.4423	1.92645	0.728221	0.665387	0.65206	0.786292	1.22536	0.997936	0.715423	0.71066	3.89057	1.01276	5.55403	0.857642	0.742751	5.4198	1.67189	1.17619	0.846528	1.33794	2.04567	2.26559	0.089238	0.821125	4.45939	7.31204	7.8966	1.67853	0.92394
ZN-GBM-17	5.23	1	70	Male	W	Hypermethylated	2	1.79587	2.67014	2.10629	0.796202	0.727397	0.713773	0.860746	1.33975	1.07642	0.78221	0.778002	3.92657	1.1073	0.770374	0.937705	0.812088	5.92575	1.82796	1.28599	0.925554	1.46284	2.21302	2.47709	0.22723	1.21114	4.91551	7.93572	4.26581	1.83522	1.01019
ZN-GBM-18	5.93	1	60	Male	M	Hypomethylated	1	1.44401	2.14711	1.69361	0.640204	0.584964	0.569145	0.69096	1.07218	0.883706	0.628953	0.626627	3.42164	0.890347	12.0448	0.753982	0.652977	4.75542	1.46017	1.03403	0.744212	1.15952	1.25511	1.97843	20.4234	0.100429	0.079273	0.157056	4.27451	1.2505	0.812267
ZN-GBM-19	30.17	0	32	Female	W	Hypermethylated	1	1.4541	2.16212	1.70544	0.644678	0.589052	0.579384	0.696811	1.08479	0.889541	0.633348	0.631474	3.44555	0.896569	12.0404	0.759251	0.657541	4.79803	1.48008	1.04126	0.749412	1.18445	1.81801	2.00567	2.55022	1.0459	3.9616	6.52004	8.20499	1.48596	0.817944
ZN-GBM-20	11.37	1	54	Female	W	Hypomethylated	2	1.67142	2.48525	1.96032	0.741026	0.677038	0.665924	0.80095	1.24691	1.00045	0.728003	0.7258	3.95124	1.03056	2.94104	0.872722	0.755811	5.5151	1.70128	1.19687	0.861413	1.36147	2.11767	2.30542	0.315239	0.090694	4.37796	7.46754	9.6633	1.70804	0.940186
ZN-GBM-21	3.7	1	49	Male	M	Hypomethylated	1	1.62312	2.41343	1.90367	0.719611	0.65752	0.645872	0.777994	1.21087	0.990606	0.706964	0.700071	3.84604	1.00078	12.8257	0.847502	0.733969	5.35572	1.65212	1.16228	0.836519	1.32212	1.70656	2.2388	0.413857	0.351552	4.39839	6.57662	2.97472	1.65868	0.913016
ZN-GBM-22	27.37	0	61	Female	M	Hypermethylated	1	1.28	1.90325	1.50125	0.567491	0.518525	0.509864	0.612669	0.954904	0.783299	0.557518	0.555793	3.03302	0.789223	10.6768	0.668346	0.578813	4.22356	1.30287	0.916586	0.659685	1.04264	1.61354	1.76554	18.2515	0.938219	3.48938	5.67228	3.14384	1.30805	0.720011
ZN-GBM-23	10.97	1	59	Male	W	Hypomethylated	2	1.90769	2.8365	2.23743	0.845776	0.772632	0.759668	0.913389	1.42317	1.1345	0.830913	0.754806	4.49615	1.17624	2.16188	0.99609	0.862652	6.29471	1.94178	1.36606	0.983182	1.55392	1.92121	2.63132	0.561355	0.131722	3.74609	2.41574	6.62719	1.94949	1.07309
ZN-GBM-24	6.43	1	52	Male	NA	NA	2	1.93506	2.86435	2.26994	0.858086	0.783933	0.770441	0.927874	1.44388	1.15169	0.843006	0.805136	1.29104	1.19336	0.276911	1.01059	0.875207	6.38633	1.97004	1.38594	0.997491	1.57654	2.29891	2.66961	0.259864	0.071585	5.27902	8.37394	2.49251	1.97786	1.08871
ZN-GBM-25	8.33	1	65	Male	M	Hypermethylated	1	1.27285	1.89261	1.49286	0.564319	0.51559	0.507052	0.610103	0.94953	0.778885	0.554402	0.552314	3.01607	0.784813	10.6172	0.664611	0.575579	4.19996	1.29559	0.911464	0.655999	1.03681	1.59248	1.75567	17.1965	0.103111	3.34964	5.61598	5.89597	1.30074	0.715988
ZN-GBM-26	8.8	1	80	Male	M	Hypomethylated	2	2.12612	3.16115	2.49361	0.942617	0.861221	0.844531	1.01884	1.58612	1.27013	0.926051	0.918267	4.76944	1.31092	1.30731	1.11014	0.961424	7.01544	2.16411	1.52247	1.09576	1.73185	1.6852	2.92799	0.053063	0.09689	4.37063	0.224033	0.926612	2.14461	1.19596
ZN-GBM-27	13.17	1	56	Male	W	Hypomethylated	1	1.48305	2.20515	1.73939	0.65751	0.600734	0.590222	0.710985	1.10638	0.900645	0.645955	0.643479	3.51414	0.914415	12.3592	0.774364	0.670629	4.89353	1.50955	1.06198	0.76433	1.20803	1.80333	2.0456	4.55644	0.139682	4.02182	6.54904	5.63506	1.51554	0.834225
ZN-GBM-28	11.1	1	43	Male	M	Hypomethylated	2	1.7863	2.65606	2.09506	0.791958	0.723572	0.710857	0.856419	1.33261	1.07167	0.77804	0.727601	4.22972	1.10139	4.37382	0.932706	0.807759	5.89416	1.81822	1.27913	0.92062	1.45504	2.22	2.46388	0.430423	0.425709	4.88957	8.00068	2.6536	1.82544	1.00481
ZN-GBM-29	40.7	1	53	Male	M	Hypermethylated	1	1.2343	1.83529	1.44764	0.547228	0.50001	0.49202	0.591697	0.920807	0.755367	0.537611	0.53602	2.92472	0.761043	10.2956	0.644482	0.558146	4.07275	1.25635	0.883858	0.63613	1.00541	1.56388	1.70249	17.5589	0.906707	3.33564	5.54929	6.57678	1.26134	0.694302
ZN-GBM-30	12.17	1	61	Male	W	Hypomethylated	2	2.39371	2.16217	2.844	1.07568	0.982798	0.965387	1.16047	1.80285	1.45014	1.05678	1.02778	0.115983	1.49598	0.063607	1.26686	1.09715	8.0058	2.46961	1.7374	1.25044	1.90789	2.21839	3.34588	0.0264	0.043773	0.144694	0.910878	0.906614	0.336379	1.36479
ZN-GBM-31	5.23	1	75	Female	M	Hypomethylated	2	1.87298	2.76862	2.19704	0.830508	0.758848	0.745734	0.898108	1.39748	1.12033	0.815913	0.813444	1.35133	1.15501	0.251512	0.978108	0.847079	6.18107	1.90672	1.3414	0.965433	1.52587	2.28955	2.58381	0.743485	0.054431	5.14085	2.86831	9.89466	1.9143	1.05372
ZN-GBM-32	14.13	1	64	Male	W	Hypomethylated	2	1.80065	2.65334	2.11213	0.798413	0.729417	0.716071	0.86187	1.34321	1.06976	0.784382	0.776258	1.3671	1.11037	0.201703	0.940309	0.814343	5.94221	1.83156	1.28956	0.928124	1.4669	2.20856	2.48396	0.064829	0.031945	4.5933	7.09214	9.87783	1.84032	1.013
ZN-GBM-33	6.5	1	70	Male	W	Hypermethylated	1	2.10853	3.13519	2.47299	0.93482	0.85416	0.828529	0.992382	0.053062	1.27574	0.918392	0.903322	4.99613	1.30008	10.7094	1.10096	0.953472	0.50246	1.3606	1.50988	1.08669	1.71752	1.65718	2.8976	0.101752	0.018414	1.01703	0.204368	6.04588	0.531846	1.18607
ZN-GBM-34	5.07	1	73	Female	M	Hypomethylated	2	1.72487	2.56436	2.02301	0.764722	0.698688	0.684895	0.825804	1.28643	1.02007	0.751282	0.74719	4.06587	1.06352	1.71694	0.900629	0.77998	5.69146	1.75569	1.23514	0.888958	1.405	1.98784	2.37914	0.351547	0.033503	4.51401	6.77013	9.22253	1.76266	0.970251
ZN-GBM-35	22	0	47	Male	W	Hypomethylated	1	1.43516	2.13395	1.67641	0.636279	0.581378	0.570742	0.686514	1.07048	0.878288	0.625097	0.623247	3.40066	0.884888	11.971	0.74936	0.648974	4.73552	1.4608	1.02769	0.739649	1.16902	1.17907	1.97954	20.4445	0.721531	0.486794	1.40027	0.827171	1.4666	0.807287
ZN-GBM-36	39.23	1	52	Male	NA	NA	1	1.3856	2.06026	1.6251	0.614308	0.561302	0.552292	0.66435	1.03368	0.847554	0.603512	0.601726	3.28323	0.854332	11.5475	0.723484	0.626564	4.572	1.41036	0.992202	0.714108	1.12865	1.75587	1.91119	6.95236	0.837327	3.80107	6.21856	8.02342	1.41596	0.779411
ZN-GBM-37	6.23	1	70	Female	NA	NA	2	1.60088	2.38036	1.87758	0.70975	0.64851	0.63674	0.767474	1.19428	0.973187	0.697277	0.694839	3.79203	0.987067	5.85206	0.835889	0.723912	5.28233	1.62948	1.14636	0.825057	1.30401	2.01709	2.20812	1.75707	0.127493	4.29822	7.07312	8.7012	1.63595	0.900505
ZN-GBM-38	21.53	0	67	Male	NA	NA	1	1.53344	2.28008	1.79849	0.679851	0.621191	0.611714	0.735233	1.14397	0.93511	0.667904	0.665927	3.63354	0.945486	10.2458	0.800676	0.693416	5.05981	1.56084	1.09807	0.7903	1.24907	1.93818	2.1151	0.522285	0.269551	4.20716	6.87757	8.59337	1.56704	0.86257
ZN-GBM-39	2.13	1	61	Male	W	Hypomethylated	1	1.29515	1.92576	1.51901	0.574205	0.52466	0.514038	0.619387	0.966012	0.792604	0.564114	0.562217	3.0689	0.79856	10.8031	0.676254	0.585662	4.27353	1.31829	0.92743	0.66749	1.05497	0.964987	1.78642	18.431	0.381526	3.4576	4.30995	5.48939	1.32352	0.72853
ZN-GBM-40	46	1	42	Male	W	Hypomethylated	1	1.23284	1.83313	1.44594	0.546583	0.499421	0.49126	0.591072	0.919723	0.754477	0.536977	0.535388	2.92127	0.760146	10.2835	0.643723	0.557489	4.06796	1.25487	0.882817	0.635381	1.00422	1.56305	1.70049	17.5863	0.330431	3.38801	5.54961	7.14465	1.25986	0.693484
ZN-GBM-41	10.2	1	62	Male	W	Hypomethylated	1	1.62574	2.41733	1.90675	0.720774	0.658583	0.648106	0.779394	1.21283	0.985017	0.708107	0.706012	3.85225	1.0024	11.6164	0.848871	0.735155	5.36438	1.65479	1.16416	0.837871	1.32426	1.61198	2.24242	0.558724	0.134155	4.33041	6.82488	3.77254	1.66136	0.914492
ZN-GBM-42	151.07	0	27	Male	NA	NA	1	1.38703	2.06239	1.62678	0.614943	0.561883	0.553107	0.665037	1.03475	0.844815	0.604136	0.602348	3.28663	0.855216	11.555	0.724232	0.627212	4.57672	1.41182	0.993228	0.714847	1.12982	1.7537	1.91316	6.66418	1.01923	3.80951	6.24368	8.03253	1.41742	0.780217
ZN-GBM-43	18.4	0	68	Male	NA	NA	1	1.46078	2.17204	1.71327	0.647638	0.591757	0.582557	0.700395	1.08977	0.892513	0.636256	0.634373	3.46137	0.900685	11.9982	0.762737	0.66056	4.82006	1.48688	1.04604	0.752853	1.18989	1.85503	2.01488	2.24367	0.69586	4.01376	6.57564	8.45232	1.49278	0.821699
ZN-GBM-44	3.03	1	63	Female	M	Hypermethylated	1	1.22665	1.82391	1.43867	0.543835	0.496911	0.489401	0.588101	0.915099	0.750684	0.534278	0.532697	2.90659	0.756325	10.2318	0.640487	0.554686	4.04751	1.24856	0.878379	0.632187	0.999175	1.55005	1.69194	17.4853	0.892786	3.356	5.49764	7.10658	1.25352	0.689998
ZN-GBM-45	5.17	1	30	Male	NA	NA	2	1.72395	2.56341	2.02205	0.764361	0.698409	0.686289	0.826576	1.28122	1.03251	0.750928	0.748656	3.87639	1.06302	0.459419	0.900205	0.779612	5.68877	1.75385	1.23456	0.888539	1.40434	2.08821	2.37802	0.079289	0.205962	4.73241	7.68552	9.55805	1.76183	0.969793
ZN-GBM-46	17.6	0	54	Male	M	Hypomethylated	1	1.22822	1.82624	1.44051	0.544531	0.497546	0.489991	0.588781	0.916269	0.751644	0.534961	0.533378	2.9103	0.757292	10.2448	0.641306	0.555395	4.05268	1.25016	0.879502	0.632995	1.00045	1.53207	1.6941	17.5202	0.903713	3.37025	5.38055	7.11386	1.25513	0.69088
ZN-GBM-47	11.07	1	72	Male	W	Hypomethylated	2	1.94055	2.85743	2.27663	0.860595	0.786112	0.773035	0.927232	1.44782	1.15711	0.845471	0.808628	1.23523	1.19685	0.232741	1.01354	0.877766	6.405	1.97051	1.39	1.00041	1.58115	2.26088	2.67742	0.046386	0.126855	1.32541	7.59787	9.48611	1.98365	1.09189
ZN-GBM-48	17	0	52	Male	W	Hypermethylated	1	1.2306	1.8298	1.44331	0.54559	0.498514	0.490836	0.590034	0.918051	0.752529	0.536002	0.534416	2.91596	0.758765	10.2648	0.642553	0.556476	4.06056	1.25259	0.881213	0.634227	1.0024	1.56024	1.6974	17.5543	0.526233	3.37695	5.53015	7.13203	1.25757	0.692224
ZN-GBM-49	16.8	0	69	Female	W	Hypomethylated	1	1.34672	2.00245	1.5795	0.597071	0.545553	0.537506	0.645709	1.00468	0.821051	0.586578	0.584842	3.19111	0.830361	11.2227	0.703183	0.608984	4.44371	1.37078	0.964362	0.694071	1.09698	1.70904	1.85756	9.36079	0.984401	3.70128	6.06065	7.805	1.37623	0.757541
ZN-GBM-50	8.53	1	56	Male	M	Hypermethylated	2	1.93154	2.87112	2.26031	0.85635	0.782404	0.769561	0.924299	1.44096	1.15723	0.841301	0.836605	3.91677	1.19095	0.702461	1.00854	0.873436	6.3734	1.96605	1.38314	0.995473	1.57335	2.03892	2.66421	0.130636	0.093505	5.09442	8.19349	0.674625	1.97386	1.08651
ZN-GBM-51	9.37	1	74	Male	W	Hypermethylated	1	1.40114	2.08336	1.64332	0.621194	0.567513	0.55635	0.670977	1.04527	0.856974	0.610277	0.4842	3.32004	0.86391	11.6872	0.731594	0.633589	4.62325	1.42617	1.00333	0.722114	1.14131	1.54289	1.93261	13.5131	0.159435	3.5635	6.04614	3.7279	1.43183	0.788148
ZN-GBM-52	9.17	1	54	Female	NA	NA	1	1.42471	2.11842	1.67097	0.631649	0.577064	0.567299	0.683104	1.06286	0.863175	0.620548	0.513715	3.37592	0.878449	10.2555	0.743907	0.644252	4.70106	1.45017	1.02021	0.734267	1.16051	1.80101	1.96514	7.8906	0.703928	3.915	6.41038	7.42613	1.45593	0.801413
ZN-GBM-53	1.07	1	53	Female	M	Hypermethylated	2	1.64775	2.45005	1.93256	0.730532	0.66745	0.655288	0.789994	1.22925	0.99396	0.717694	0.711854	3.9034	1.01597	4.95098	0.860364	0.745108	5.437	1.67719	1.17992	0.849215	1.34219	2.01847	2.27278	0.12945	0.044034	4.38445	7.24209	9.3556	1.68385	0.926872
ZN-GBM-54	15.13	0	63	Female	M	Hypermethylated	1	1.22874	1.82702	1.44112	0.544762	0.497758	0.489876	0.589139	0.916659	0.751819	0.535188	0.533317	2.91154	0.757614	10.2492	0.641578	0.555631	4.0544	1.25069	0.879876	0.633264	1.00088	1.55151	1.69482	17.3938	0.902946	3.37161	5.51204	7.05391	1.25566	0.691174
ZN-GBM-55	14.8	0	59	Male	W	Hypomethylated	1	1.22639	1.82352	1.43836	0.54372	0.496805	0.489441	0.588012	0.914905	0.750524	0.534164	0.532584	2.90597	0.756164	10.2296	0.640351	0.554568	4.04665	1.2483	0.878192	0.632053	0.998963	1.55511	1.69158	17.4942	0.879414	3.3708	5.52018	7.1083	1.25326	0.689852
ZN-GBM-56	14.47	0	62	Female	M	Hypermethylated	1	1.22669	1.82397	1.43872	0.543853	0.496927	0.489453	0.58812	0.915129	0.750708	0.534295	0.532714	2.90668	0.756349	10.2321	0.640507	0.554704	4.04764	1.2486	0.878407	0.632207	0.999207	1.55133	1.69199	17.4984	0.898133	3.35262	5.47841	7.10286	1.25356	0.690021
ZN-GBM-57	13.53	0	39	Female	W	Hypomethylated	2	2.04559	3.0095	2.40099	0.907606	0.829294	0.814602	0.979682	1.52721	1.22505	0.891655	0.889017	0.8522	1.26223	0.139007	1.06891	0.925715	6.75488	2.08373	1.46592	1.05506	1.66752	2.1877	2.82368	0.138965	0.037612	4.30909	1.22103	6.25418	2.09164	1.15154
ZN-GBM-58	12.93	0	27	Female	M	Hypermethylated	1	1.24077	1.84491	1.45524	0.550097	0.502632	0.494782	0.594727	0.925635	0.759327	0.54043	0.53883	2.94005	0.765033	10.3496	0.647861	0.561073	4.09411	1.26294	0.888492	0.639466	1.01068	1.54642	1.71142	17.6993	0.050525	3.40729	5.35778	7.08882	1.26796	0.697943
ZN-GBM-59	12.83	0	54	Male	NA	NA	1	1.23773	1.84039	1.45167	0.548748	0.5014	0.494004	0.590368	0.923329	0.757465	0.539104	0.5374	2.93284	0.763157	10.3242	0.646273	0.559697	4.08407	1.25984	0.886313	0.637898	1.0082	1.57381	1.70722	17.6559	0.910749	3.38951	5.57159	6.26695	1.26485	0.696231
ZN-GBM-60	5.27	1	60	Female	W	Hypomethylated	1	1.95082	2.90069	2.23882	0.8649	0.789987	0.775187	0.93347	1.45506	1.19095	0.8497	0.826786	4.62255	1.20284	16.1963	1.01861	0.882157	6.43703	1.98568	1.39689	1.00541	1.57374	0.978098	1.92471	1.89088	0.069685	0.098833	0.050324	0.36636	0.10793	1.09735
ZN-GBM-61	10.7	0	50	Male	W	Hypermethylated	1	1.54825	2.30211	1.81587	0.68642	0.627193	0.617034	0.741883	1.15502	0.937887	0.674357	0.672316	3.66865	0.954621	10.0505	0.808412	0.700116	5.1087	1.57592	1.10868	0.797936	1.26114	1.95418	2.13554	0.446831	0.047781	4.12913	6.82429	8.56846	1.58218	0.870905
ZN-GBM-62	10.5	0	44	Male	W	Hypermethylated	1	1.58688	2.35954	1.86117	0.703545	0.64284	0.632614	0.75607	1.18347	0.962355	0.691181	0.689136	3.76017	0.978437	12.3636	0.828581	0.717583	5.23615	1.61523	1.13634	0.817844	1.29261	1.75542	2.18882	0.058381	0.016524	4.28286	6.15788	5.68237	1.62165	0.892632
ZN-GBM-63	10.13	0	5	Male	W	Hypomethylated	1	1.4257	2.11989	1.67138	0.632087	0.577548	0.567859	0.681573	1.06356	0.872502	0.620979	0.619141	3.37826	0.879058	11.8921	0.744423	0.644698	4.70432	1.45118	1.02092	0.734776	1.16132	1.54639	1.9665	20.3374	0.089685	1.51603	1.05291	0.958612	1.45681	0.801969
ZN-GBM-64	9.87	0	53	Male	M	Hypomethylated	2	2.10557	2.43033	2.47038	0.933833	0.852887	0.839253	1.00824	1.56104	1.24521	0.917422	0.913288	1.59633	1.2987	0.114619	1.0998	0.952465	6.95007	2.14394	1.50829	1.08554	1.71571	1.94139	2.90527	0.035776	0.025706	1.82701	3.62446	4.15715	2.15245	1.18481
ZN-GBM-65	0.53	1	42	Female	M	Hypermethylated	2	1.79734	2.37019	2.12167	0.802019	0.732765	0.719836	0.866187	1.34949	1.07024	0.787925	0.785222	0.165946	1.11539	0.05067	0.944556	0.818022	5.96905	1.84132	1.29539	0.932316	1.47353	2.14133	2.49518	0.049191	0.018573	4.95407	8.07159	9.79475	1.84863	1.01757
ZN-GBM-66	9.53	0	58	Male	NA	NA	1	1.25619	1.86783	1.47331	0.556931	0.508877	0.500966	0.602153	0.937136	0.768761	0.547144	0.545414	2.97658	0.774538	10.4782	0.65591	0.568043	4.14497	1.27863	0.899531	0.647411	1.02324	1.53174	1.73268	17.9192	0.924331	2.97353	5.43685	5.56821	1.28371	0.706614
ZN-GBM-67	2.23	1	48	Male	NA	NA	2	1.75068	2.6031	2.05328	0.776165	0.709194	0.697451	0.839341	1.30604	1.04595	0.762524	0.760268	4.14727	1.07943	4.26716	0.914106	0.791651	5.77662	1.78196	1.25363	0.902261	1.42603	2.1124	2.41475	0.15151	0.088693	3.23378	3.28865	10.0723	1.78903	0.984769
ZN-GBM-68	7.43	1	40	Female	M	Hypomethylated	1	1.49183	2.21822	1.74969	0.661406	0.604293	0.5935	0.715285	1.11293	0.911312	0.649782	0.587732	3.53496	0.919833	12.4228	0.778952	0.674602	4.92253	1.51849	1.06827	0.768858	1.21518	1.8429	2.05772	1.33754	0.057379	4.08454	6.63154	8.59181	1.52452	0.839167
ZN-GBM-69	9.07	0	52	Male	W	Hypomethylated	2	1.61429	2.40029	1.89331	0.715695	0.653942	0.64335	0.770782	1.20414	0.984412	0.703118	0.700848	3.82511	0.995335	8.64546	0.84289	0.729975	5.32658	1.64313	1.15596	0.831967	1.31493	2.03649	2.22662	0.148936	0.137356	4.38198	7.22788	6.52949	1.64966	0.908048
ZN-GBM-70	8.97	0	50	Male	W	Hypermethylated	1	1.26279	1.87766	1.48106	0.559861	0.511554	0.502861	0.602287	0.941917	0.772805	0.550022	0.548394	2.99224	0.778612	10.5333	0.65936	0.571031	4.16678	1.28536	0.904263	0.650816	1.02862	1.60168	1.7418	18.0135	0.279087	2.10943	5.67444	6.36649	1.29046	0.710331
ZN-GBM-71	8.67	0	53	Male	M	Hypomethylated	1	1.30023	1.93332	1.52497	0.576458	0.526718	0.518682	0.623226	0.969992	0.795714	0.566327	0.564651	3.08094	0.801694	10.8455	0.678907	0.587959	4.2903	1.32346	0.931069	0.670109	1.05911	1.59611	1.79343	18.5475	0.179381	3.49767	5.78438	2.4432	1.32872	0.731388
ZN-GBM-72	8.5	0	81	Male	M	Hypermethylated	1	1.25425	1.86495	1.47104	0.556073	0.508092	0.500635	0.601371	0.935691	0.767576	0.5463	0.544684	2.97199	0.773344	10.462	0.654899	0.567168	4.13858	1.27438	0.898144	0.646413	1.02166	1.50517	1.73001	17.8916	0.922906	3.44026	3.44019	7.24665	1.28173	0.705525
ZN-GBM-73	8.17	0	51	Male	M	Hypermethylated	1	1.22706	1.82453	1.43916	0.544019	0.497079	0.4891	0.588192	0.915409	0.749141	0.534459	0.532877	2.90757	0.756581	10.2352	0.640703	0.554874	4.04887	1.24899	0.878676	0.632401	0.999513	1.56021	1.69251	17.5038	0.902793	3.3277	5.51855	7.05579	1.25395	0.690232
ZN-GBM-74	8.1	0	59	Male	M	Hypermethylated	1	1.22586	1.82274	1.43775	0.543487	0.496592	0.489303	0.587724	0.914513	0.750203	0.533936	0.532356	2.90473	0.75584	10.2252	0.640076	0.554331	4.04491	1.24777	0.877816	0.631782	0.998535	1.55872	1.69086	17.4867	0.902017	3.35342	5.51817	7.10598	1.25272	0.689556
ZN-GBM-75	7.8	0	69	Female	W	Hypermethylated	1	1.29386	1.92385	1.5175	0.573633	0.524137	0.515572	0.618997	0.965239	0.791815	0.563552	0.561808	3.06584	0.797765	10.7924	0.67558	0.585078	4.26928	1.31698	0.926506	0.666825	1.05392	1.57931	1.78464	18.1606	0.65231	3.55572	5.67872	2.75705	1.32221	0.727804
ZN-GBM-76	5.8	1	53	Female	M	Hypomethylated	1	1.56135	2.32158	1.83123	0.692226	0.632498	0.621567	0.748616	1.16479	0.937039	0.680061	0.622345	3.69963	0.962695	8.78408	0.81525	0.706038	5.15191	1.58925	1.11805	0.804685	1.27181	1.96788	2.1536	0.563303	0.128544	4.28397	7.00458	8.8504	1.59556	0.878271
ZN-GBM-77	7.3	0	59	NA	NA	NA	1	1.28322	1.90803	1.50502	0.568917	0.519829	0.511334	0.615112	0.957304	0.785306	0.558919	0.557265	3.04064	0.791207	10.7037	0.670026	0.580268	4.23418	1.30615	0.91889	0.661344	1.04526	1.61312	1.76997	18.3049	0.943923	2.75821	3.8662	5.44448	1.3113	0.721821
ZN-GBM-78	7.2	0	53	Male	M	Hypermethylated	1	1.22945	1.82808	1.44196	0.54508	0.498048	0.490486	0.589483	0.917194	0.752402	0.535501	0.533916	2.91324	0.758056	10.2552	0.641953	0.555956	4.05677	1.25142	0.880389	0.633634	1.00146	1.55817	1.69581	17.5379	0.89447	3.1462	5.53039	7.07459	1.25639	0.691577
ZN-GBM-79	5.03	1	59	Male	W	Hypermethylated	2	0.925112	0.079601	2.9166	1.10273	1.00729	0.98478	1.15067	1.85547	1.45105	1.08335	0.618116	0.026551	0.891744	0.014371	1.29871	1.12473	8.20711	2.53171	1.78108	1.28188	2.02602	2.27978	3.42673	0.016534	0.011655	1.28261	0.277643	1.34731	1.31998	1.39903
