# Supplementary material for: Clinical Significance and Molecular Annotation of Cellular Morphometric Subtypes in Lower Grade Gliomas discovered by Machine Learning: a retrospective multicentric study
Source: Research Square preprint supplement (doi:10.21203/rs.3.rs-770415/v2), 2021-08-16
Supplement: Supplementary file 34 [file fc6c4a57e6e92a06b1d2aa5e.xlsx]

## Sheet: Sheet1
Supplementary Table 12 Univariate Cox proportional hazards regression result on top 30 CMBs with largest variations, and CMB-low/high cut points (estimated via survminer package in R) for prognositic signficant CMB.
CMB_ID	coef	HR	LCI	UCI	P value	FDR	Survival Cut Point
CMB_168	-0.551621	0.576015	0.414559	0.800353	0.0010126	0.00524832	0.4889
CMB_89	-0.367702	0.692323	0.560111	0.855744	0.000672005	0.00524832	0.3945
CMB_166	0.632289	1.88191	1.31863	2.68581	0.000493811	0.00524832	2.0126
CMB_131	1.25235	3.49855	1.60374	7.63208	0.00165052	0.00524832	0.9642
CMB_116	1.37111	3.93972	1.67746	9.25291	0.00164743	0.00524832	0.881
CMB_2	1.40647	4.0815	1.69757	9.81326	0.00167641	0.00524832	0.8646
CMB_140	1.17222	3.22914	1.54051	6.76877	0.00190734	0.00529177	1.0021
CMB_197	0.800177	2.22593	1.34057	3.69603	0.00198265	0.00535076	1.3476
CMB_17	0.943453	2.56884	1.40877	4.68418	0.00208324	0.0055553	1.0078
CMB_43	1.32228	3.75198	1.56981	8.9676	0.00293631	0.00679402	0.9132
CMB_202	1.27659	3.58438	1.53626	8.36306	0.00314496	0.00697496	0.9381
CMB_210	-0.191068	0.826076	0.724384	0.942045	0.00436214	0.00913195	0.1122
CMB_83	-0.856026	0.424847	0.233681	0.7724	0.00500491	0.0101	0.756
CMB_23	-0.0514936	0.94981	0.916136	0.984721	0.00517445	0.0103489	0.03
CMB_162	0.986731	2.68245	1.32479	5.43146	0.00611879	0.0117146	1.0947
CMB_145	1.0285	2.79686	1.22625	6.37916	0.0144938	0.02319	0.7721
CMB_139	0.146141	1.15736	1.02659	1.30479	0.0168989	0.0261059	6.9175
CMB_115	0.448486	1.56594	1.0717	2.28811	0.0204578	0.030348	2.2258
CMB_208	0.676087	1.96617	1.10712	3.49178	0.0210417	0.0310088	1.2226
CMB_152	0.806532	2.24013	1.0937	4.58824	0.0274668	0.0375156	0.8799
CMB_147	0.510204	1.66563	1.01425	2.73534	0.0438133	0.0527644	NA
CMB_72	0.497372	1.64439	1.01251	2.67063	0.0444099	0.0531968	NA
CMB_6	0.301583	1.352	0.996166	1.83493	0.0529519	0.0621006	NA
CMB_196	-0.0216088	0.978623	0.956831	1.00091	0.0600099	0.0696488	NA
CMB_177	-0.35053	0.704315	0.450512	1.1011	0.124167	0.134364	NA
CMB_144	-0.0849969	0.918515	0.81318	1.0375	0.171415	0.182843	NA
CMB_223	-0.0427274	0.958173	0.893879	1.02709	0.227941	0.240796	NA
CMB_245	-0.0373631	0.963326	0.906435	1.02379	0.228971	0.240796	NA
CMB_30	0.217194	1.24258	0.858801	1.79787	0.249177	0.257215	NA
CMB_181	0.129281	1.13801	0.539445	2.40074	0.734283	0.737575	NA
Abbreviations: CMB, cellular morphometric biomaker; LCI, Lower confidence interval; UCI, upper confidence interval; FDR, false discovery rate.
